# Supplementary material for: Implementation of Recommendations on the Use of Corticosteroids in Severe COVID-19
Source: PubMed Central journal article supplement (PMC10751594; doi:10.1001/jamanetworkopen.2023.46502), 2023-12-26
Supplement: jamanetwopen-e2346502-s002.pdf [file jamanetwopen-e2346502-s002.pdf]

| <b>*Group Name(s): ISARIC Clinical Characterisation Group</b> |                   |                              |                         |                                                                                                       |                                                 |                                                                |                                                                                                   |
|---------------------------------------------------------------|-------------------|------------------------------|-------------------------|-------------------------------------------------------------------------------------------------------|-------------------------------------------------|----------------------------------------------------------------|---------------------------------------------------------------------------------------------------|
| <b>*First Name and Middle Initial(s)</b>                      | <b>*Last Name</b> | <b>*Suffix (eg, Jr, III)</b> | <b>Academic Degrees</b> | <b>Institution</b>                                                                                    | <b>Location (city, state/province, country)</b> | <b>Role or Contribution, eg, chair, principal investigator</b> | <b>Group (if more than 1 Group listed in the byline) and/or Subgroup (eg, Steering Committee)</b> |
| Sheryl Ann                                                    | Abdukahil         |                              |                         | King Abdulaziz Medical City, Riyadh, Saudi Arabia                                                     | Saudi Arabia                                    |                                                                |                                                                                                   |
| Nurul Najmee                                                  | Abdulkadir        |                              |                         | Tuanku Fauziah Hospital, Perlis, Malaysia                                                             | Malaysia                                        |                                                                |                                                                                                   |
| Ryuzo                                                         | Abe               |                              |                         | Chiba University Hospital, Chiba, Japan                                                               | Japan                                           |                                                                |                                                                                                   |
| Laurent                                                       | Abel              |                              |                         | INSERM, Paris, France                                                                                 | France                                          |                                                                |                                                                                                   |
| Amal                                                          | Abrous            |                              |                         | INSERM, Paris, France                                                                                 | France                                          |                                                                |                                                                                                   |
| Lara                                                          | Absil             |                              |                         | CUB-Hopital Erasme, Anderlecht, Belgium                                                               | Belgium                                         |                                                                |                                                                                                   |
| Kamal                                                         | Abu Jabal         |                              |                         | Ziv Medical Centre Safed, Israel                                                                      | Israel                                          |                                                                |                                                                                                   |
| Nashat                                                        | Abu Salah         |                              |                         | Ziv Medical Centre Safed, Israel                                                                      | Israel                                          |                                                                |                                                                                                   |
| Andrew                                                        | Acker             |                              |                         | Perelman School of Medicine at the University of Pennsylvania, Philadelphia, United States of America | United States of America                        |                                                                |                                                                                                   |
| Elisabeth                                                     | Adam              |                              |                         | Uniklinik University Hospital, Frankfurt, Germany                                                     | Germany                                         |                                                                |                                                                                                   |
| Diana                                                         | Adrião            |                              |                         | Centro Hospitalar Vila Nova de Gaia/Espinho, Espinho, Portugal                                        | Portugal                                        |                                                                |                                                                                                   |
| Saleh Al                                                      | Ageel             |                              |                         | King Faisal Hospital Research Center, Riyadh, Saudi Arabia                                            | Saudi Arabia                                    |                                                                |                                                                                                   |
| Shakeel                                                       | Ahmed             |                              |                         | University Hospital, Kerry, Ireland                                                                   | Ireland                                         |                                                                |                                                                                                   |
| Kate                                                          | Ainscough         |                              |                         | St Vincents University Hospital, Dublin, Ireland                                                      | Ireland                                         |                                                                |                                                                                                   |
| Eka                                                           | Airlangga         |                              |                         | Murni Teguh Memorial Hospital and Bunda Thamrin Hospital, North Sumatera, Indonesia                   | Indonesia                                       |                                                                |                                                                                                   |
| Tharwat                                                       | Aisa              |                              |                         | Our lady of Lourdes Drogheda, Drogheda, Ireland                                                       | Ireland                                         |                                                                |                                                                                                   |
| Ali                                                           | Ait Hssain        |                              |                         | Hamad General Hospital, Doha, Qatar                                                                   | Qatar                                           |                                                                |                                                                                                   |
| Younes                                                        | Ait Tamlihat      |                              |                         | Centre Hospitalier de Saintonge, Saintes, France                                                      | France                                          |                                                                |                                                                                                   |
| Takako                                                        | Akimoto           |                              |                         | Teine Keijinkai Hospital, Sapporo, Japan                                                              | Japan                                           |                                                                |                                                                                                   |
| Ernita                                                        | Akmal             |                              |                         | Persahabatan Hospital, Jakarta, Indonesia                                                             | Indonesia                                       |                                                                |                                                                                                   |
| Chika                                                         | Akwani            |                              |                         | University of Nebraska Medical Centre                                                                 | United States of America                        |                                                                |                                                                                                   |

| *First Name and Middle Initial(s) | *Last Name | *Suffix (eg, Jr, III) | Academic Degrees | Institution                                                                                       | Location (city, state/province, country) | Role or Contribution, eg, chair, principal investigator | Group (if more than 1 Group listed in the byline) and/or Subgroup (eg, Steering Committee) |
|-----------------------------------|------------|-----------------------|------------------|---------------------------------------------------------------------------------------------------|------------------------------------------|---------------------------------------------------------|--------------------------------------------------------------------------------------------|
| Eman                              | Al Qasim   |                       |                  | King Abdulaziz Medical City, Riyadh, Saudi Arabia                                                 | Saudi Arabia                             |                                                         |                                                                                            |
| Razi                              | Alalqam    |                       |                  | Beaumont Hospital, Dublin, Ireland                                                                | Ireland                                  |                                                         |                                                                                            |
| Aliya Mohammed                    | Alameen    |                       |                  | Al-Neelain university, Khartoum, Sudan                                                            | Sudan                                    |                                                         |                                                                                            |
| Angela                            | Alberti    |                       |                  | Northwell Health, New York, United States of America                                              | United States of America                 |                                                         |                                                                                            |
| Tala                              | Al-dabbous |                       |                  | Al-Adan Hospital, Hadiya, Kuwait                                                                  | Kuwait                                   |                                                         |                                                                                            |
| Senthilkumar                      | Alegesan   |                       |                  | Galway University Hospital, Galway, Ireland                                                       | Ireland                                  |                                                         |                                                                                            |
| Marta                             | Alessi     |                       |                  | University Hospital Policlinico Paolo Giaccone, Palermo, Italy                                    | Italy                                    |                                                         |                                                                                            |
| Beatrice                          | Alex       |                       |                  | School of Informatics, University of Edinburgh, Edinburgh, UK                                     | United Kingdom                           |                                                         |                                                                                            |
| Kévin                             | Alexandre  |                       |                  | Centre Hospitalier Universitaire Rouen (Center Hospitalier Universitaire de Rouen), Rouen, France | France                                   |                                                         |                                                                                            |
| Abdulrahman                       | Al-Fares   |                       |                  | Al-Amiri & Jaber Al-Ahmed Hospitals, Kuwait City, Kuwait                                          | Kuwait                                   |                                                         |                                                                                            |
| Huda                              | Alfoudri   |                       |                  | Al-Adan Hospital, Hadiya, Kuwait                                                                  | Kuwait                                   |                                                         |                                                                                            |
| Imran                             | Ali        |                       |                  | Sligo University Hospital (Saolta), Sligo, Ireland                                                | Ireland                                  |                                                         |                                                                                            |
| Adam                              | Ali        |                       |                  | St Bernard's Hospital, Gibraltar, Gibraltar                                                       | Gibraltar                                |                                                         |                                                                                            |
| Kazali Enagnon                    | Alidjnou   |                       |                  | Centre Hospitalier Universitaire de Lille, Lille, France                                          | France                                   |                                                         |                                                                                            |
| Qabas                             | Alkhafajee |                       |                  | University Hospital, Kerry, Ireland                                                               | Ireland                                  |                                                         |                                                                                            |
| Clotilde                          | Allavena   |                       |                  | Centre Hospitalier Universitaire de Nantes (Hôpital femme-enfant-adolescent), Nantes, France      | France                                   |                                                         |                                                                                            |
| Nathalie                          | Allou      |                       |                  | Centre Hospitalier Félix-Guyon, Saint-Denis, Réunion                                              | Réunion                                  |                                                         |                                                                                            |
| João                              | Alves      |                       |                  | Centro Hospital e Universitário de Coimbra, Coimbra, Portugal                                     | Portugal                                 |                                                         |                                                                                            |
| Rita                              | Alves      |                       |                  | Hospital Curry Cabral - Intensive Care Unit - UCIP7, Lisbon, Portugal                             | Portugal                                 |                                                         |                                                                                            |

| *First Name and Middle Initial(s) | *Last Name       | *Suffix (eg, Jr, III) | Academic Degrees | Institution                                                                                                 | Location (city, state/province, country) | Role or Contribution, eg, chair, principal investigator | Group (if more than 1 Group listed in the byline) and/or Subgroup (eg, Steering Committee) |
|-----------------------------------|------------------|-----------------------|------------------|-------------------------------------------------------------------------------------------------------------|------------------------------------------|---------------------------------------------------------|--------------------------------------------------------------------------------------------|
| João Melo                         | Alves            |                       |                  | Hospital de São José -U.U.M., Lisbon, Portugal                                                              | Portugal                                 |                                                         |                                                                                            |
| Joana                             | Alves Cabrita    |                       |                  | Hospital Curry Cabral - Intensive Care Unit - UCIP7, Lisbon, Portugal                                       | Portugal                                 |                                                         |                                                                                            |
| Maria                             | Amaral           |                       |                  | Hospital Curry Cabral - Intensive Care Unit - UCIP7, Lisbon, Portugal                                       | Portugal                                 |                                                         |                                                                                            |
| Nur                               | Amira            |                       |                  | Sungai Buloh Hospital, Selangor, Malaysia                                                                   | Malaysia                                 |                                                         |                                                                                            |
| Roberto                           | Andini           |                       |                  | University of Campania, Carseta, Italy                                                                      | Italy                                    |                                                         |                                                                                            |
| Claire                            | Andréjak         |                       |                  | Centre Hospitalier Universitaire Amiens-Picardie, Amiens, France                                            | France                                   |                                                         |                                                                                            |
| Andrea                            | Angheben         |                       |                  | Department of Infectious - Tropical Diseases and Microbiology - IRCCS Sacro Cuore Hospital - Negrar - Italy | Italy                                    |                                                         |                                                                                            |
| François                          | Angoulvant       |                       |                  | INSERM, Paris, France                                                                                       | France                                   |                                                         |                                                                                            |
| Séverine                          | Ansart           |                       |                  | Centre Hospitalier Universitaire de Brest, Brest, France                                                    | France                                   |                                                         |                                                                                            |
| Sivanesen                         | Anthonidass      |                       |                  | Kuala Lumpur Hospital, WPKL, Malaysia                                                                       | Malaysia                                 |                                                         |                                                                                            |
| Massimo                           | Antonelli        |                       |                  | Fondazione Policlinico Universitario Agostino Gemelli IRCCS, Rome, Italy                                    | Italy                                    |                                                         |                                                                                            |
| Carlos Alexandre                  | Antunes de Brito |                       |                  | Centro de Pesquisa Aggeu Magalhães, Fiocruz, Recife, Brazil                                                 | Brazil                                   |                                                         |                                                                                            |
| Ardiyana                          | Apriyana         |                       |                  | National Cardiovascular Center Harapan Kita Jakarta Indonesia, Jakarta, Indonesia                           | Indonesia                                |                                                         |                                                                                            |
| Yaseen                            | Arabi            |                       |                  | Intensive Care Department, Ministry of National Guard Health Affairs, Riyadh, Saudi Arabia                  | Saudi Arabia                             |                                                         |                                                                                            |
| Irene                             | Aragao           |                       |                  | Centro Hospitalar Universitário do Porto (CHUP), Porto, Portugal                                            | Portugal                                 |                                                         |                                                                                            |
| Francisco                         | Arancibia        |                       |                  | Instituto Nacional Del Tórax, Santiago, Chile                                                               | Chile                                    |                                                         |                                                                                            |
| Carolline                         | Araujo           |                       |                  | Centro de Pesquisa Aggeu Magalhães, Fiocruz, Recife, Brazil                                                 | Brazil                                   |                                                         |                                                                                            |
| Antonio                           | Arcadipane       |                       |                  | Istituto Mediterraneo per i Trapianti e Terapie ad Alta Specializzazione, Palermo, Italy                    | Italy                                    |                                                         |                                                                                            |

| *First Name and Middle Initial(s) | *Last Name    | *Suffix (eg, Jr, III) | Academic Degrees | Institution                                                                                       | Location (city, state/province, country) | Role or Contribution, eg, chair, principal investigator | Group (if more than 1 Group listed in the byline) and/or Subgroup (eg, Steering Committee) |
|-----------------------------------|---------------|-----------------------|------------------|---------------------------------------------------------------------------------------------------|------------------------------------------|---------------------------------------------------------|--------------------------------------------------------------------------------------------|
| Patrick                           | Archambault   |                       |                  | CISSS Chaudière-Appalaches, Canada                                                                | Canada                                   |                                                         |                                                                                            |
| Lukas                             | Arenz         |                       |                  | LMU Hospital Munich, Medical Department II, Campus Großhadern, Munich, Germany                    | Germany                                  |                                                         |                                                                                            |
| Jean-Benoît                       | Arlet         |                       |                  | Hôpital Européen Georges-Pompidou AP-HP, Paris, France                                            | France                                   |                                                         |                                                                                            |
| Christel                          | Arnold-Day    |                       |                  | Groote Schuur Hospital, Cape Town, South Africa                                                   | South Africa                             |                                                         |                                                                                            |
| Lovkesh                           | Arora         |                       |                  | University of Iowa, Iowa City, United States of America                                           | United States of America                 |                                                         |                                                                                            |
| Rakesh                            | Arora         |                       |                  | St. Boniface Hospital, Manitoba, Canada                                                           | Canada                                   |                                                         |                                                                                            |
| Elise                             | Artaud-Macari |                       |                  | Centre Hospitalier Universitaire Rouen (Center Hospitalier Universitaire de Rouen), Rouen, France | France                                   |                                                         |                                                                                            |
| Angel                             | Asensio       |                       |                  | Hospital Puerta de Hierro Majadahonda, Madrid, Spain                                              | Spain                                    |                                                         |                                                                                            |
| Elizabeth A.                      | Ashley        |                       |                  | Lao-Oxford-Mahosot Hospital-Wellcome Trust Research Unit, Vientiane, Laos                         | Laos                                     |                                                         |                                                                                            |
| Muhammad                          | Ashraf        |                       |                  | Sungai Buloh Hospital, Selangor, Malaysia                                                         | Malaysia                                 |                                                         |                                                                                            |
| Jean Baptiste                     | Assie         |                       |                  | Centre Hospitalier intercommunal de Créteil, Créteil, France                                      | France                                   |                                                         |                                                                                            |
| Amirul                            | Asyraf        |                       |                  | Sungai Buloh Hospital, Selangor, Malaysia                                                         | Malaysia                                 |                                                         |                                                                                            |
| Minahel                           | Atif          |                       |                  | Galway University Hospital, Galway, Ireland                                                       | Ireland                                  |                                                         |                                                                                            |
| Anika                             | Atique        |                       |                  | McGill University Health Centre, Montreal, Canada                                                 | Canada                                   |                                                         |                                                                                            |
| AM Udara Lakshan                  | Attanyake     |                       |                  | CCA Network                                                                                       | Unknown                                  |                                                         |                                                                                            |
| Johann                            | Auchabie      |                       |                  | Centre Hospitalier de Cholet, Cholet, France                                                      | France                                   |                                                         |                                                                                            |
| Hugues                            | Aumaitre      |                       |                  | Centre Hospitalier de Perpignan, Perpignan, France                                                | France                                   |                                                         |                                                                                            |
| Adrien                            | Auvet         |                       |                  | Hôpital Européen Georges-Pompidou AP-HP, Paris, France                                            | France                                   |                                                         |                                                                                            |
| Eyvind W.                         | Axelsen       |                       |                  | The Norwegian Corona Cohort, Oslo, Norway                                                         | Norway                                   |                                                         |                                                                                            |
| Laurène                           | Azemar        |                       |                  | Hôpital Lariboisière AP-HP, Paris, France                                                         | France                                   |                                                         |                                                                                            |

| *First Name and Middle Initial(s) | *Last Name   | *Suffix (eg, Jr, III) | Academic Degrees | Institution                                                                                 | Location (city, state/province, country) | Role or Contribution, eg, chair, principal investigator | Group (if more than 1 Group listed in the byline) and/or Subgroup (eg, Steering Committee) |
|-----------------------------------|--------------|-----------------------|------------------|---------------------------------------------------------------------------------------------|------------------------------------------|---------------------------------------------------------|--------------------------------------------------------------------------------------------|
| Cecile                            | Azoulay      |                       |                  | Hôpital Cochin AP-HP, Paris, France                                                         | France                                   |                                                         |                                                                                            |
| Hakeem                            | Babatunde    |                       |                  | Clinical Services Department Fajara, Gambia                                                 | Gambia                                   |                                                         |                                                                                            |
| Benjamin                          | Bach         |                       |                  | School of Informatics, University of Edinburgh, Edinburgh, UK                               | United Kingdom                           |                                                         |                                                                                            |
| Delphine                          | Bachelet     |                       |                  | INSERM, Paris, France                                                                       | France                                   |                                                         |                                                                                            |
| Claudine                          | Badr         |                       |                  | Centre Hospitalier Intercommunal Villeneuve-Saint-Georges, Villeneuve-Saint-Georges, France | France                                   |                                                         |                                                                                            |
| Roar                              | Bævre-Jensen |                       |                  | The Norwegian Corona Cohort, Oslo, Norway                                                   | Norway                                   |                                                         |                                                                                            |
| Nadia                             | Baig         |                       |                  | Grande Prairie Queen Elizabeth II, Grande Prairie, Canada                                   | Canada                                   |                                                         |                                                                                            |
| John Kenneth                      | Baillie      |                       |                  | Roslin Institute, University of Edinburgh, Edinburgh, UK                                    | United Kingdom                           |                                                         |                                                                                            |
| J Kevin                           | Baird        |                       |                  | Murni Teguh Memorial Hospital and Bunda Thamrin Hospital, North Sumatera, Indonesia         | Indonesia                                |                                                         |                                                                                            |
| Erica                             | Bak          |                       |                  | Rush University Medical Center, Chicago, United States of America                           | United States of America                 |                                                         |                                                                                            |
| Agamemnon                         | Bakakos      |                       |                  | Sotiria General Hospital, Athens, Greece                                                    | Greece                                   |                                                         |                                                                                            |
| Nazreen Abu                       | Bakar        |                       |                  | Tuanku Fauziah Hospital, Perlis, Malaysia                                                   | Malaysia                                 |                                                         |                                                                                            |
| Andriy                            | Bal          |                       |                  | Unidade Local de Saúde de Alto Minho, Viana Do Castelo, Portugal                            | Portugal                                 |                                                         |                                                                                            |
| Mohanaprasanth                    | Balakrishnan |                       |                  | Sungai Buloh Hospital, Selangor, Malaysia                                                   | Malaysia                                 |                                                         |                                                                                            |
| Firouzé                           | Bani-Sadr    |                       |                  | Centre Hospitalier Universitaire de Reims, Reims, France                                    | France                                   |                                                         |                                                                                            |
| Renata                            | Barbalho     |                       |                  | Instituto de Infectologia Emílio Ribas, Sao Paulo, Brazil                                   | Brazil                                   |                                                         |                                                                                            |
| Nicholas Yuri                     | Barbosa      |                       |                  | Caja Nacional De Salud, Trinidad, Bolivia                                                   | Bolivia                                  |                                                         |                                                                                            |
| Wendy S.                          | Barclay      |                       |                  | Section of Molecular Virology, Imperial College London, London, UK                          | United Kingdom                           |                                                         |                                                                                            |
| Saef Umar                         | Barnett      |                       |                  | Sungai Buloh Hospital, Selangor, Malaysia                                                   | Malaysia                                 |                                                         |                                                                                            |
| Michaela                          | Barnikel     |                       |                  | LMU Hospital Munich, Medical Department II, Campus Großhadern, Munich, Germany              | Germany                                  |                                                         |                                                                                            |
| Helena                            | Barrasa      |                       |                  | Hospital Universitario de Alava, Araba, Spain                                               | Spain                                    |                                                         |                                                                                            |

| *First Name and Middle Initial(s) | *Last Name      | *Suffix (eg, Jr, III) | Academic Degrees | Institution                                                                            | Location (city, state/province, country) | Role or Contribution, eg, chair, principal investigator | Group (if more than 1 Group listed in the byline) and/or Subgroup (eg, Steering Committee) |
|-----------------------------------|-----------------|-----------------------|------------------|----------------------------------------------------------------------------------------|------------------------------------------|---------------------------------------------------------|--------------------------------------------------------------------------------------------|
| Cleide                            | Barrigoto       |                       |                  | Hospital de São José -U.U.M., Lisbon, Portugal                                         | Portugal                                 |                                                         |                                                                                            |
| Marie                             | Bartoli         |                       |                  | INSERM, Paris, France                                                                  | France                                   |                                                         |                                                                                            |
| Joaquín                           | Baruch          |                       |                  | ISARIC, Pandemic Sciences Institute, University of Oxford, Oxford, UK                  | United Kingdom                           |                                                         |                                                                                            |
| Romain                            | Basmaci         |                       |                  | INSERM, Paris, France                                                                  | France                                   |                                                         |                                                                                            |
| Muhammad Fadhli Hassin            | Basri           |                       |                  | Sungai Buloh Hospital, Selangor, Malaysia                                              | Malaysia                                 |                                                         |                                                                                            |
| Denise                            | Battaglini      |                       |                  | San Martino Hospital, Genoa, Italy                                                     | Italy                                    |                                                         |                                                                                            |
| Jules                             | Bauer           |                       |                  | Centre Hospitalier Universitaire de Lille, Lille, France                               | France                                   |                                                         |                                                                                            |
| Diego Fernando                    | Bautista Rincon |                       |                  | Clinica Valle de Lilli, Valle del Cauca, Colombia                                      | Colombia                                 |                                                         |                                                                                            |
| Denisse                           | Bazan Dow       |                       |                  | University of Washington Medical Center - Northwest, Seattle, United States of America | United States of America                 |                                                         |                                                                                            |
| Abigail                           | Beane           |                       |                  | Critical Care Asia - Thailand                                                          | Unknown                                  |                                                         |                                                                                            |
| Alexandra                         | Bedossa         |                       |                  | Grand Hôpital de l'Est Francilien (Site de Marne-la-Vallée), Jossigny, France          | France                                   |                                                         |                                                                                            |
| Ker Hong                          | Bee             |                       |                  | Raja Permaisuri Bainun Hospital, Perak, Malaysia                                       | Malaysia                                 |                                                         |                                                                                            |
| Husna                             | Begum           |                       |                  | WHO-ISARIC Clinical Characterisation Protocol & SPRINT-SARI, United Kingdom            | United Kingdom                           |                                                         |                                                                                            |
| Sylvie                            | Behilill        |                       |                  | INSERM, Paris, France                                                                  | France                                   |                                                         |                                                                                            |
| Albertus                          | Beishuizen      |                       |                  | Medisch Spectrum Twente, Zutphen, Netherlands                                          | Netherlands                              |                                                         |                                                                                            |
| Aleksandr                         | Beljantsev      |                       |                  | Tartu University Hospital, Tartu, Estonia                                              | Estonia                                  |                                                         |                                                                                            |
| David                             | Bellemare       |                       |                  | Hôpital de l'Enfant-Jésus, Quebec, Canada                                              | Canada                                   |                                                         |                                                                                            |
| Anna                              | Beltrame        |                       |                  | Follow Up Study Working Group, United Kingdom                                          | United Kingdom                           |                                                         |                                                                                            |
| Beatriz Amorim                    | Beltrão         |                       |                  | Sao Camilo Cura D'ars, Fortaleza, Brazil                                               | Brazil                                   |                                                         |                                                                                            |
| Marine                            | Beluze          |                       |                  | INSERM, Paris, France                                                                  | France                                   |                                                         |                                                                                            |
| Nicolas                           | Benech          |                       |                  | Centre Hospitalier Universitaire de Lyon - HCL, Lyon, France                           | France                                   |                                                         |                                                                                            |
| Lionel Eric                       | Benjiman        |                       |                  | Sarawak General Hospital, Sarawak, Malaysia                                            | Malaysia                                 |                                                         |                                                                                            |

| *First Name and Middle Initial(s) | *Last Name     | *Suffix (eg, Jr, III) | Academic Degrees | Institution                                                                                                          | Location (city, state/province, country) | Role or Contribution, eg, chair, principal investigator | Group (if more than 1 Group listed in the byline) and/or Subgroup (eg, Steering Committee) |
|-----------------------------------|----------------|-----------------------|------------------|----------------------------------------------------------------------------------------------------------------------|------------------------------------------|---------------------------------------------------------|--------------------------------------------------------------------------------------------|
| Suzanne                           | Bennett        |                       |                  | University of Cincinnati, Cincinnati, United States of America                                                       | United States of America                 |                                                         |                                                                                            |
| Luís                              | Bento          |                       |                  | Hospital de São José -U.U.M., Lisbon, Portugal                                                                       | Portugal                                 |                                                         |                                                                                            |
| Jan-Erik                          | Berdal         |                       |                  | Akershus University Hospital, Nordbyhagen, Norway                                                                    | Norway                                   |                                                         |                                                                                            |
| Delphine                          | Bergeaud       |                       |                  | Centre Hospitalier de Saintonge, Saintes, France                                                                     | France                                   |                                                         |                                                                                            |
| Hazel                             | Bergin         |                       |                  | St Vincents University Hospital, Dublin, Ireland                                                                     | Ireland                                  |                                                         |                                                                                            |
| José Luis                         | Bernal Sobrino |                       |                  | Hospital 12 de Octubre, Madrid, Spain                                                                                | Spain                                    |                                                         |                                                                                            |
| Giulia                            | Bertoli        |                       |                  | Ospedale Sacro Cuore Don Calabria, Negrar Di Valpolicella, Italy                                                     | Italy                                    |                                                         |                                                                                            |
| Lorenzo                           | Bertolino      |                       |                  | University of Campania, Carseta, Italy                                                                               | Italy                                    |                                                         |                                                                                            |
| Simon                             | Bessis         |                       |                  | Hôpital Raymond-Poincaré, Garches, France                                                                            | France                                   |                                                         |                                                                                            |
| Sybille                           | Bevilacqua     |                       |                  | Centre Hospitalier Régional et Universitaire de Nancy - Hôpitaux de Brabois, Nancy, France                           | France                                   |                                                         |                                                                                            |
| Karine                            | Bezulier       |                       |                  | Hôpital de la Timone, Marseille, France                                                                              | France                                   |                                                         |                                                                                            |
| Amar                              | Bhatt          |                       |                  | Ohio State University, Columbus, United States of America                                                            | United States of America                 |                                                         |                                                                                            |
| Krishna                           | Bhavsar        |                       |                  | INSERM, Paris, France                                                                                                | France                                   |                                                         |                                                                                            |
| Claudia                           | Bianco         |                       |                  | Istituto Mediterraneo per i Trapianti e Terapie ad Alta Specializzazione, Palermo, Italy                             | Italy                                    |                                                         |                                                                                            |
| Farah Nadiah                      | Bidin          |                       |                  | Sungai Buloh Hospital, Selangor, Malaysia                                                                            | Malaysia                                 |                                                         |                                                                                            |
| Felwa                             | Bin Humaid     |                       |                  | King Abdulaziz Medical City, Riyadh, Saudi Arabia                                                                    | Saudi Arabia                             |                                                         |                                                                                            |
| Mohd Nazlin                       | Bin Kamarudin  |                       |                  | Sungai Buloh Hospital, Selangor, Malaysia                                                                            | Malaysia                                 |                                                         |                                                                                            |
| Zeno                              | Bisoffi        |                       |                  | Department of Infectious, Tropical Diseases and Microbiology, IRCCS Sacro Cuore Don Calabria Hospital, Negrar, Italy | Italy                                    |                                                         |                                                                                            |
| Patrick                           | Biston         |                       |                  | Civil Hospital Marie Curie, Charleroi, Belgium                                                                       | Belgium                                  |                                                         |                                                                                            |
| Laurent                           | Bitker         |                       |                  | Hôpital Lyon Sud - HCL, Lyon, France                                                                                 | France                                   |                                                         |                                                                                            |

| *First Name and Middle Initial(s) | *Last Name       | *Suffix (eg, Jr, III) | Academic Degrees | Institution                                                                                                                                 | Location (city, state/province, country) | Role or Contribution, eg, chair, principal investigator | Group (if more than 1 Group listed in the byline) and/or Subgroup (eg, Steering Committee) |
|-----------------------------------|------------------|-----------------------|------------------|---------------------------------------------------------------------------------------------------------------------------------------------|------------------------------------------|---------------------------------------------------------|--------------------------------------------------------------------------------------------|
| Mustapha                          | Bittaye          |                       |                  | Clinical Services Department Fajara, Gambia                                                                                                 | Gambia                                   |                                                         |                                                                                            |
| Jonathan                          | Bitton           |                       |                  | The Centre hospitalier universitaire Sainte-Justine, Montreal, Canada                                                                       | Canada                                   |                                                         |                                                                                            |
| Pablo                             | Blanco-Schweizer |                       |                  | Rio Hortega University Hospital, Valladolid, Spain                                                                                          | Spain                                    |                                                         |                                                                                            |
| Catherine                         | Blier            |                       |                  | Hôpital de l'Enfant-Jésus, Quebec, Canada                                                                                                   | Canada                                   |                                                         |                                                                                            |
| Frank                             | Bloos            |                       |                  | Jena University Hospital, Jena, Germany                                                                                                     | Germany                                  |                                                         |                                                                                            |
| Mathieu                           | Blot             |                       |                  | Centre Hospitalier Universitaire Mitterrand Dijon-Bourgogne, Dijon, France                                                                  | France                                   |                                                         |                                                                                            |
| Filomena                          | Boccia           |                       |                  | University of Campania, Carseta, Italy                                                                                                      | Italy                                    |                                                         |                                                                                            |
| Laetitia                          | Bodenes          |                       |                  | Centre Hospitalier Universitaire de Brest, Brest, France                                                                                    | France                                   |                                                         |                                                                                            |
| Debby                             | Bogaert          |                       |                  | Centre for Inflammation Research, The Queen's Medical Research Institute, University of Edinburgh, 47 Little France Crescent, Edinburgh, UK | United Kingdom                           |                                                         |                                                                                            |
| Anne-Hélène                       | Boivin           |                       |                  | Centre Hospitalier de Dax - Côte d'Argent, Dax, France                                                                                      | France                                   |                                                         |                                                                                            |
| Isabela                           | Bolaños          |                       |                  | Universidad del Cauca, Cauca, Colombia                                                                                                      | Colombia                                 |                                                         |                                                                                            |
| Pierre-Adrien                     | Bolze            |                       |                  | Hôpital Lyon Sud - HCL, Lyon, France                                                                                                        | France                                   |                                                         |                                                                                            |
| François                          | Bompart          |                       |                  | INSERM, Paris, France                                                                                                                       | France                                   |                                                         |                                                                                            |
| Aurelius                          | Bonfasius        |                       |                  | Pratama Rada Bolo Hospital, Karitas Hospital and Waikabubak Hospital, Sumba, Indonesia                                                      | Indonesia                                |                                                         |                                                                                            |
| Diogo                             | Borges           |                       |                  | Hospital Curry Cabral - Intensive Care Unit - UCIP7, Lisbon, Portugal                                                                       | Portugal                                 |                                                         |                                                                                            |
| Raphaël                           | Borie            |                       |                  | Hôpital Bichat Claude-Bernard AP-HP, Paris, France                                                                                          | France                                   |                                                         |                                                                                            |
| Hans Martin                       | Bosse            |                       |                  | University Hospital Dusseldorf, Dusseldorf, Germany                                                                                         | Germany                                  |                                                         |                                                                                            |
| Elisabeth                         | Botelho-Nevers   |                       |                  | Centre Hospitalier Universitaire de Saint-Étienne, Saint-Étienne, France                                                                    | France                                   |                                                         |                                                                                            |
| Lila                              | Bouadma          |                       |                  | INSERM, Paris, France                                                                                                                       | France                                   |                                                         |                                                                                            |
| Olivier                           | Bouchaud         |                       |                  | Hôpital Avicenne, Bobigny, France                                                                                                           | France                                   |                                                         |                                                                                            |



| *First Name and Middle Initial(s) | *Last Name     | *Suffix (eg, Jr, III) | Academic Degrees | Institution                                                                                                                                                                                     | Location (city, state/province, country) | Role or Contribution, eg, chair, principal investigator | Group (if more than 1 Group listed in the byline) and/or Subgroup (eg, Steering Committee) |
|-----------------------------------|----------------|-----------------------|------------------|-------------------------------------------------------------------------------------------------------------------------------------------------------------------------------------------------|------------------------------------------|---------------------------------------------------------|--------------------------------------------------------------------------------------------|
| Sabelline                         | Bouchez        |                       |                  | Centre Hospitalier Universitaire de Nantes (Hôpital femme-enfant-adolescent), Nantes, France                                                                                                    | France                                   |                                                         |                                                                                            |
| Dounia                            | Bouhmani       |                       |                  | Centre hospitalier de l'université de Montréal, Montreal, Canada                                                                                                                                | Canada                                   |                                                         |                                                                                            |
| Damien                            | Bouhour        |                       |                  | Centre Hospitalier de Bourg-en-Bresse, Bourg-en-Bresse, France                                                                                                                                  | France                                   |                                                         |                                                                                            |
| Kévin                             | Bouiller       |                       |                  | Centre Hospitalier Universitaire de Besançon, Besançon, France                                                                                                                                  | France                                   |                                                         |                                                                                            |
| Laurence                          | Bouillet       |                       |                  | Centre Hospitalier Universitaire Grenoble-Alpes, Grenoble, France                                                                                                                               | France                                   |                                                         |                                                                                            |
| Camile                            | Bouisse        |                       |                  | Centre Hospitalier de Bourg-en-Bresse, Bourg-en-Bresse, France                                                                                                                                  | France                                   |                                                         |                                                                                            |
| Latsaniphone                      | Bountthasavong |                       |                  | Xieng Khouang Provincial Hospital, Phonsavan, Laos                                                                                                                                              | Laos                                     |                                                         |                                                                                            |
| Anne-Sophie                       | Boureau        |                       |                  | Centre Hospitalier Universitaire de Nantes (Hôtel-Dieu), Nantes, France                                                                                                                         | France                                   |                                                         |                                                                                            |
| John                              | Bourke         |                       |                  | Galway University Hospital, Galway, Ireland                                                                                                                                                     | Ireland                                  |                                                         |                                                                                            |
| Maude                             | Bouscambert    |                       |                  | INSERM, Paris, France                                                                                                                                                                           | France                                   |                                                         |                                                                                            |
| Aurore                            | Bousquet       |                       |                  | Hôpital d'Instruction des Armées Bégin, Saint-Mandé, France                                                                                                                                     | France                                   |                                                         |                                                                                            |
| Jason                             | Bouziotis      |                       |                  | CUB-Hopital Erasme, Anderlecht, Belgium                                                                                                                                                         | Belgium                                  |                                                         |                                                                                            |
| Marielle                          | Boyer-Besseyre |                       |                  | Centre Hospitalier Universitaire de Lille, Lille, France                                                                                                                                        | France                                   |                                                         |                                                                                            |
| Maria                             | Boylan         |                       |                  | Galway University Hospital, Galway, Ireland                                                                                                                                                     | Ireland                                  |                                                         |                                                                                            |
| Fernando Augusto                  | Bozza          |                       |                  | National Institute of Infectious Disease Evandro Chagas, Oswaldo Cruz Foundation (INI-FIOCRUZ), Ministry of Health, and D'Or Institute of Research and Education (IDOR), Rio de Janeiro, Brazil | Brazil                                   |                                                         |                                                                                            |
| Axelle                            | Braconnier     |                       |                  | Centre Hospitalier de Mayotte, Mamoudzou, Mayotte                                                                                                                                               | Mayotte                                  |                                                         |                                                                                            |

| *First Name and Middle Initial(s) | *Last Name    | *Suffix (eg, Jr, III) | Academic Degrees | Institution                                                                | Location (city, state/province, country) | Role or Contribution, eg, chair, principal investigator | Group (if more than 1 Group listed in the byline) and/or Subgroup (eg, Steering Committee) |
|-----------------------------------|---------------|-----------------------|------------------|----------------------------------------------------------------------------|------------------------------------------|---------------------------------------------------------|--------------------------------------------------------------------------------------------|
| Cynthia                           | Braga         |                       |                  | Centro de Pesquisa Aggeu Magalhães, Fiocruz, Recife, Brazil                | Brazil                                   |                                                         |                                                                                            |
| Timo                              | Brandenburger |                       |                  | University Hospital Dusseldorf, Dusseldorf, Germany                        | Germany                                  |                                                         |                                                                                            |
| Filipa                            | Brás Monteiro |                       |                  | Hospital Egas Moniz, Lisboa, Portugal                                      | Portugal                                 |                                                         |                                                                                            |
| Luca                              | Brazzi        |                       |                  | Ospedale Molinette, Torino, Italy                                          | Italy                                    |                                                         |                                                                                            |
| Patrick                           | Breen         |                       |                  | Beacon Hospital, Dublin, Ireland                                           | Ireland                                  |                                                         |                                                                                            |
| Dorothy                           | Breen         |                       |                  | Cork University Hospital, Cork, Ireland                                    | Ireland                                  |                                                         |                                                                                            |
| David                             | Brewster      |                       |                  | Monash University, Melbourne, Australia                                    | Australia                                |                                                         |                                                                                            |
| Kathy                             | Brickell      |                       |                  | St Vincents University Hospital, Dublin, Ireland                           | Ireland                                  |                                                         |                                                                                            |
| Tessa                             | Broadley      |                       |                  | Monash University, Melbourne, Australia                                    | Australia                                |                                                         |                                                                                            |
| Helen                             | Brotherton    |                       |                  | Clinical Services Department Fajara, Gambia                                | Gambia                                   |                                                         |                                                                                            |
| Shaunagh                          | Browne        |                       |                  | Cork University Hospital, Cork, Ireland                                    | Ireland                                  |                                                         |                                                                                            |
| Alex                              | Browne        |                       |                  | Nelson Hospital, Nelson, New Zealand                                       | New Zealand                              |                                                         |                                                                                            |
| Nicolas                           | Brozzi        |                       |                  | Cleveland Clinic, Weston, United States of America                         | United States of America                 |                                                         |                                                                                            |
| Sonja Hjellegjerde                | Brunvoll      |                       |                  | The Norwegian Corona Cohort, Oslo, Norway                                  | Norway                                   |                                                         |                                                                                            |
| Marjolein                         | Brusse-Keizer |                       |                  | Medisch Spectrum Twente, Zutphen, Netherlands                              | Netherlands                              |                                                         |                                                                                            |
| Petra                             | Bryda         |                       |                  | Galway University Hospital, Galway, Ireland                                | Ireland                                  |                                                         |                                                                                            |
| Nina                              | Buchtele      |                       |                  | Medical University of Vienna, Vienna, Austria                              | Austria                                  |                                                         |                                                                                            |
| Polina                            | Bugaeva       |                       |                  | Sechenov University, Moscow, Russia                                        | Russia                                   |                                                         |                                                                                            |
| Marielle                          | Buisson       |                       |                  | Centre Hospitalier Universitaire Mitterrand Dijon-Bourgogne, Dijon, France | France                                   |                                                         |                                                                                            |
| Danilo                            | Buonsenso     |                       |                  | Follow Up Study Working Group, United Kingdom                              | United Kingdom                           |                                                         |                                                                                            |
| Erlina                            | Burhan        |                       |                  | Persahabatan Hospital, Jakarta, Indonesia                                  | Indonesia                                |                                                         |                                                                                            |
| Ingrid G.                         | Bustos        |                       |                  | Clinica Universidad de La Sabana, Chia, Colombia                           | Colombia                                 |                                                         |                                                                                            |
| Denis                             | Butnaru       |                       |                  | Sechenov University, Moscow, Russia                                        | Russia                                   |                                                         |                                                                                            |

| *First Name and Middle Initial(s) | *Last Name     | *Suffix (eg, Jr, III) | Academic Degrees | Institution                                                                                 | Location (city, state/province, country) | Role or Contribution, eg, chair, principal investigator | Group (if more than 1 Group listed in the byline) and/or Subgroup (eg, Steering Committee) |
|-----------------------------------|----------------|-----------------------|------------------|---------------------------------------------------------------------------------------------|------------------------------------------|---------------------------------------------------------|--------------------------------------------------------------------------------------------|
| André                             | Cabie          |                       |                  | Centre Hospitalier Universitaire de Martinique, Fort-de-France, Saint Martin (French)       | Saint Martin (French)                    |                                                         |                                                                                            |
| Susana                            | Cabral         |                       |                  | Centro Hospital e Universitário de Coimbra, Coimbra, Portugal                               | Portugal                                 |                                                         |                                                                                            |
| Joana                             | Cabrita        |                       |                  | Hospital Curry Cabral - Intensive Care Unit - UCIP7, Lisbon, Portugal                       | Portugal                                 |                                                         |                                                                                            |
| Eder                              | Caceres        |                       |                  | Clinica Universidad de La Sabana, Chia, Colombia                                            | Colombia                                 |                                                         |                                                                                            |
| Cyril                             | Cadoz          |                       |                  | Centre Hospitalier Régional Metz-Thionville, Metz, France                                   | France                                   |                                                         |                                                                                            |
| Rui                               | Caetano Garcês |                       |                  | Hospital Curry Cabral - Intensive Care Unit - UCIP7, Lisbon, Portugal                       | Portugal                                 |                                                         |                                                                                            |
| Kate                              | Calligy        |                       |                  | Johns Hopkins, Baltimore, United States of America                                          | United States of America                 |                                                         |                                                                                            |
| Jose Andres                       | Calvache       |                       |                  | Universidad del Cauca, Cauca, Colombia                                                      | Colombia                                 |                                                         |                                                                                            |
| João                              | Camões         |                       |                  | Comissão de Ética - Unidade Local de Saúde de Matosinhos, Porto, Portugal                   | Portugal                                 |                                                         |                                                                                            |
| Valentine                         | Campana        |                       |                  | Centre Hospitalier Universitaire de Martinique, Fort-de-France, Saint Martin (French)       | Saint Martin (French)                    |                                                         |                                                                                            |
| Paul                              | Campbell       |                       |                  | Presbyterian Hospital Services, Albuquerque, United States of America                       | United States of America                 |                                                         |                                                                                            |
| Josie                             | Campisi        |                       |                  | McGill University Health Centre, Montreal, Canada                                           | Canada                                   |                                                         |                                                                                            |
| Cecilia                           | Canepa         |                       |                  | Hospital del Mar, Barcelona, Spain                                                          | Spain                                    |                                                         |                                                                                            |
| Mireia                            | Cantero        |                       |                  | Hospital Puerta de Hierro Majadahonda, Madrid, Spain                                        | Spain                                    |                                                         |                                                                                            |
| Janice                            | Caoli          |                       |                  | Makati Medical Centre, Makati, Philippines                                                  | The Philippines                          |                                                         |                                                                                            |
| Pauline                           | Carau-Paz      |                       |                  | Centre Hospitalier Intercommunal Villeneuve-Saint-Georges, Villeneuve-Saint-Georges, France | France                                   |                                                         |                                                                                            |

| *First Name and Middle Initial(s) | *Last Name | *Suffix (eg, Jr, III) | Academic Degrees | Institution                                                                  | Location (city, state/province, country) | Role or Contribution, eg, chair, principal investigator | Group (if more than 1 Group listed in the byline) and/or Subgroup (eg, Steering Committee) |
|-----------------------------------|------------|-----------------------|------------------|------------------------------------------------------------------------------|------------------------------------------|---------------------------------------------------------|--------------------------------------------------------------------------------------------|
| Sheila                            | Cárcel     |                       |                  | Reina Sofia University Hospital, Cordoba, Spain                              | Spain                                    |                                                         |                                                                                            |
| Sofia                             | Cardoso    |                       |                  | Hospital Curry Cabral - Intensive Care Unit - UCIP7, Lisbon, Portugal        | Portugal                                 |                                                         |                                                                                            |
| Filipe                            | Cardoso    |                       |                  | Hospital Curry Cabral - Intensive Care Unit - UCIP7, Lisbon, Portugal        | Portugal                                 |                                                         |                                                                                            |
| Filipa                            | Cardoso    |                       |                  | Hospital Curry Cabral - Intensive Care Unit - UCIP7, Lisbon, Portugal        | Portugal                                 |                                                         |                                                                                            |
| Nelson                            | Cardoso    |                       |                  | Hospital Espírito Santo de Évora, Évora, Portugal                            | Portugal                                 |                                                         |                                                                                            |
| Simone                            | Carelli    |                       |                  | Fondazione Policlinico Universitario Agostino Gemelli IRCCS, Rome, Italy     | Italy                                    |                                                         |                                                                                            |
| Nicolas                           | Carlier    |                       |                  | Hôpital Cochin AP-HP, Paris, France                                          | France                                   |                                                         |                                                                                            |
| Thierry                           | Carmoi     |                       |                  | Hôpital Américain de Paris, Neuilly-sur-Seine, France                        | France                                   |                                                         |                                                                                            |
| Gayle                             | Carney     |                       |                  | Vancouver Island Health, Vancouver, Canada                                   | Canada                                   |                                                         |                                                                                            |
| Inês                              | Carqueja   |                       |                  | Comissão de Ética - Unidade Local de Saúde de Matosinhos, Porto, Portugal    | Portugal                                 |                                                         |                                                                                            |
| Marie-Christine                   | Carret     |                       |                  | Centre Hospitalier Métropole Savoie, Chambéry, France                        | France                                   |                                                         |                                                                                            |
| François Martin                   | Carrier    |                       |                  | Department of Anesthesiology, Centre hospitalier de l'Université de Montréal | Canada                                   |                                                         |                                                                                            |
| Ida                               | Carroll    |                       |                  | University Hospital - Limerick, Limerick, Ireland                            | Ireland                                  |                                                         |                                                                                            |
| Gail                              | Carson     |                       |                  | ISARIC, Pandemic Sciences Institute, University of Oxford, Oxford, UK        | United Kingdom                           |                                                         |                                                                                            |
| Maire-Laure                       | Casanova   |                       |                  | Centre Hospitalier de Béziers, Béziers, France                               | France                                   |                                                         |                                                                                            |
| Mariana                           | Cascão     |                       |                  | Hospital Curry Cabral - Intensive Care Unit - UCIP7, Lisbon, Portugal        | Portugal                                 |                                                         |                                                                                            |
| Siobhan                           | Casey      |                       |                  | Galway University Hospital, Galway, Ireland                                  | Ireland                                  |                                                         |                                                                                            |
| José                              | Casimiro   |                       |                  | Hospital Curry Cabral - Intensive Care Unit - UCIP7, Lisbon, Portugal        | Portugal                                 |                                                         |                                                                                            |

| *First Name and Middle Initial(s) | *Last Name         | *Suffix (eg, Jr, III) | Academic Degrees | Institution                                                                                            | Location (city, state/province, country) | Role or Contribution, eg, chair, principal investigator | Group (if more than 1 Group listed in the byline) and/or Subgroup (eg, Steering Committee) |
|-----------------------------------|--------------------|-----------------------|------------------|--------------------------------------------------------------------------------------------------------|------------------------------------------|---------------------------------------------------------|--------------------------------------------------------------------------------------------|
| Bailey                            | Cassandra          |                       |                  | University of Cincinnati, Cincinnati, United States of America                                         | United States of America                 |                                                         |                                                                                            |
| Silvia                            | Castañeda          |                       |                  | Hospital del Mar, Barcelona, Spain                                                                     | Spain                                    |                                                         |                                                                                            |
| Nidyanara                         | Castanheira        |                       |                  | Instituto de Infectologia Emílio Ribas, Sao Paulo, Brazil                                              | Brazil                                   |                                                         |                                                                                            |
| Guylaine                          | Castor-Alexandre   |                       |                  | Hôpital Lariboisière AP-HP, Paris, France                                                              | France                                   |                                                         |                                                                                            |
| Ivo                               | Castro             |                       |                  | Hospital São Francisco Xavier, Lisbon, Portugal                                                        | Portugal                                 |                                                         |                                                                                            |
| Ana                               | Catarino           |                       |                  | Centro Hospital e Universitário de Coimbra, Coimbra, Portugal                                          | Portugal                                 |                                                         |                                                                                            |
| François-Xavier                   | Catherine          |                       |                  | Centre Hospitalier Universitaire Mitterrand Dijon-Bourgogne, Dijon, France                             | France                                   |                                                         |                                                                                            |
| Paolo                             | Cattaneo           |                       |                  | Ospedale Sacro Cuore Don Calabria, Negrar Di Valpolicella, Italy                                       | Italy                                    |                                                         |                                                                                            |
| Roberta                           | Cavalin            |                       |                  | Instituto de Infectologia Emílio Ribas, Sao Paulo, Brazil                                              | Brazil                                   |                                                         |                                                                                            |
| Giulio Giovanni                   | Cavalli            |                       |                  | Policlinicodi Orsola Universitàdi Bologna, Bologna, Italy                                              | Italy                                    |                                                         |                                                                                            |
| Alexandros                        | Cavayas            |                       |                  | Hospital du Sacre Coeur, Montreal, Canada                                                              | Canada                                   |                                                         |                                                                                            |
| Adrian                            | Ceccato            |                       |                  | Hospital Universitari Sagrat Cor, Barcelona, Spain                                                     | Spain                                    |                                                         |                                                                                            |
| Masaneh                           | Ceesay             |                       |                  | Clinical Services Department Fajara, Gambia                                                            | Gambia                                   |                                                         |                                                                                            |
| Minerva                           | Cervantes-Gonzalez |                       |                  | INSERM, Paris, France                                                                                  | France                                   |                                                         |                                                                                            |
| Muge                              | Cevik              |                       |                  | Makati Medical Centre, Makati, Philippines                                                             | The Philippines                          |                                                         |                                                                                            |
| Anissa                            | Chair              |                       |                  | INSERM, Paris, France                                                                                  | France                                   |                                                         |                                                                                            |
| Catherine                         | Chakveatze         |                       |                  | Centre Hospitalier de Melun, Melun, France                                                             | France                                   |                                                         |                                                                                            |
| Adrienne                          | Chan               |                       |                  | Sunnybrook Health Sciences Centre, Toronto, Canada                                                     | Canada                                   |                                                         |                                                                                            |
| Meera                             | Chand              |                       |                  | Antimicrobial Resistance and Hospital Acquired Infection Department, Public Health England, London, UK | United Kingdom                           |                                                         |                                                                                            |

| *First Name and Middle Initial(s) | *Last Name     | *Suffix (eg, Jr, III) | Academic Degrees | Institution                                                                            | Location (city, state/province, country) | Role or Contribution, eg, chair, principal investigator | Group (if more than 1 Group listed in the byline) and/or Subgroup (eg, Steering Committee) |
|-----------------------------------|----------------|-----------------------|------------------|----------------------------------------------------------------------------------------|------------------------------------------|---------------------------------------------------------|--------------------------------------------------------------------------------------------|
| Jean-Marc                         | Chapplain      |                       |                  | Centre Hospitalier Universitaire Rennes (Hôpital Pontchaillou), Rennes, France         | France                                   |                                                         |                                                                                            |
| Charlotte                         | Charpentier    |                       |                  | Hôpital Bichat Claude-Bernard AP-HP, Paris, France                                     | France                                   |                                                         |                                                                                            |
| Julie                             | Chas           |                       |                  | Hôpital Tenon AP-HP, Paris, France                                                     | France                                   |                                                         |                                                                                            |
| Jonathan Samuel                   | Chávez Iñiguez |                       |                  | University of Guadalajara Health Sciences Center, Guadalajara, Mexico                  | Mexico                                   |                                                         |                                                                                            |
| Anjellica                         | Chen           |                       |                  | McGill University Health Centre, Montreal, Canada                                      | Canada                                   |                                                         |                                                                                            |
| Yih-Sharng                        | Chen           |                       |                  | National Taiwan University Hospital, Taipei City, Taiwan                               | Taiwan                                   |                                                         |                                                                                            |
| Léo                               | Chenard        |                       |                  | Hôpital Bichat Claude-Bernard AP-HP, Paris, France                                     | France                                   |                                                         |                                                                                            |
| Matthew Pellan                    | Cheng          |                       |                  | McGill University Health Centre, Montreal, Canada                                      | Canada                                   |                                                         |                                                                                            |
| Antoine                           | Cheret         |                       |                  | Hôpital Kremlin-Bicêtre, Le Kremlin-Bicêtre, France                                    | France                                   |                                                         |                                                                                            |
| Thibault                          | Chiarabini     |                       |                  | Hôpital Saint-Antoine AP-HP, Paris, France                                             | France                                   |                                                         |                                                                                            |
| Julian                            | Chica          |                       |                  | Clinica Valle de Lilli, Valle del Cauca, Colombia                                      | Colombia                                 |                                                         |                                                                                            |
| Suresh Kumar                      | Chidambaram    |                       |                  | National Institutes of Health (NIH), Ministry of Health Malaysia, Setia Alam, Malaysia | Malaysia                                 |                                                         |                                                                                            |
| Leong                             | Chin Tho       |                       |                  | Kuala Lumpur Hospital, WPKL, Malaysia                                                  | Malaysia                                 |                                                         |                                                                                            |
| Catherine                         | Chirouze       |                       |                  | Centre Hospitalier Universitaire de Besançon, Besançon, France                         | France                                   |                                                         |                                                                                            |
| Davide                            | Chiumello      |                       |                  | Ospedale San Paolo, Milan, Italy                                                       | Italy                                    |                                                         |                                                                                            |
| Sung-Min                          | Cho            |                       |                  | Johns Hopkins, Baltimore, United States of America                                     | United States of America                 |                                                         |                                                                                            |
| Bernard                           | Cholley        |                       |                  | Hôpital Européen Georges-Pompidou AP-HP, Paris, France                                 | France                                   |                                                         |                                                                                            |
| Danoy                             | Chommanam      |                       |                  | Salavan Provincial Hospital, Salavan, Laos                                             | Laos                                     |                                                         |                                                                                            |
| Marie-Charlotte                   | Chopin         |                       |                  | Centre Hospitalier Universitaire de Lille, Lille, France                               | France                                   |                                                         |                                                                                            |
| Ting Soo                          | Chow           |                       |                  | Pulau Pinang Hospital, Pulau Pinang, Malaysia                                          | Malaysia                                 |                                                         |                                                                                            |

| *First Name and Middle Initial(s) | *Last Name        | *Suffix (eg, Jr, III) | Academic Degrees | Institution                                                                                | Location (city, state/province, country) | Role or Contribution, eg, chair, principal investigator | Group (if more than 1 Group listed in the byline) and/or Subgroup (eg, Steering Committee) |
|-----------------------------------|-------------------|-----------------------|------------------|--------------------------------------------------------------------------------------------|------------------------------------------|---------------------------------------------------------|--------------------------------------------------------------------------------------------|
| Nathaniel                         | Christy           |                       |                  | Salavan Provincial Hospital, Salavan, Laos                                                 | Laos                                     |                                                         |                                                                                            |
| Hiu Jian                          | Chua              |                       |                  | National Institutes of Health (NIH), Ministry of Health Malaysia, Setia Alam, Malaysia     | Malaysia                                 |                                                         |                                                                                            |
| Jonathan                          | Chua              |                       |                  | Sungai Buloh Hospital, Selangor, Malaysia                                                  | Malaysia                                 |                                                         |                                                                                            |
| Jose Pedro                        | Cidade            |                       |                  | Hospital São Francisco Xavier, Lisbon, Portugal                                            | Portugal                                 |                                                         |                                                                                            |
| José Miguel                       | Cisneros Herreros |                       |                  | University Hospital Virgen del Rocío / Institute of Biomedicine of Seville, Seville, Spain | Spain                                    |                                                         |                                                                                            |
| Anna                              | Ciullo            |                       |                  | University of Utah, Salt Lake City, United States of America                               | United States of America                 |                                                         |                                                                                            |
| Jennifer                          | Clarke            |                       |                  | Beaumont Hospital, Dublin, Ireland                                                         | Ireland                                  |                                                         |                                                                                            |
| Rolando                           | Claire-Del Prado  |                       |                  | Caja Nacional De Salud, Trinidad, Bolivia                                                  | Bolivia                                  |                                                         |                                                                                            |
| Sara                              | Clohisey          |                       |                  | Oxford University (ISARIC4C), Oxford, United Kingdom                                       | United Kingdom                           |                                                         |                                                                                            |
| Cassidy                           | Codan             |                       |                  | Foothills Medical Centre, Calgary, Canada                                                  | Canada                                   |                                                         |                                                                                            |
| Caitriona                         | Cody              |                       |                  | Connolly Hospital Blanchardstown, Dublin, Ireland                                          | Ireland                                  |                                                         |                                                                                            |
| Jennifer                          | Coles             |                       |                  | Monash University, Melbourne, Australia                                                    | Australia                                |                                                         |                                                                                            |
| Gwenhaël                          | Colin             |                       |                  | Centre Hospitalier Départemental Vendée, La Roche-sur-Yon, France                          | France                                   |                                                         |                                                                                            |
| Michael                           | Collins           |                       |                  | Allegheny General Hospital, Pittsburgh, United States of America                           | United States of America                 |                                                         |                                                                                            |
| Pamela                            | Combs             |                       |                  | University of Chicago, Chicago, United States of America                                   | United States of America                 |                                                         |                                                                                            |
| Jennifer                          | Connolly          |                       |                  | Cork University Hospital, Cork, Ireland                                                    | Ireland                                  |                                                         |                                                                                            |
| Marie                             | Connor            |                       |                  | Oxford University (ISARIC4C), Oxford, United Kingdom                                       | United Kingdom                           |                                                         |                                                                                            |
| Anne                              | Conrad            |                       |                  | Centre Hospitalier Universitaire de Lyon - HCL, Lyon, France                               | France                                   |                                                         |                                                                                            |
| Elaine                            | Conway            |                       |                  | University Hospital - Limerick, Limerick, Ireland                                          | Ireland                                  |                                                         |                                                                                            |

| *First Name and Middle Initial(s) | *Last Name         | *Suffix (eg, Jr, III) | Academic Degrees | Institution                                                           | Location (city, state/province, country) | Role or Contribution, eg, chair, principal investigator | Group (if more than 1 Group listed in the byline) and/or Subgroup (eg, Steering Committee) |
|-----------------------------------|--------------------|-----------------------|------------------|-----------------------------------------------------------------------|------------------------------------------|---------------------------------------------------------|--------------------------------------------------------------------------------------------|
| Graham S.                         | Cooke              |                       |                  | Department of Infectious Disease, Imperial College London, London, UK | United Kingdom                           |                                                         |                                                                                            |
| Hugues                            | Cordel             |                       |                  | Hôpital Avicenne, Bobigny, France                                     | France                                   |                                                         |                                                                                            |
| Amanda                            | Corley             |                       |                  | University of Queensland, Brisbane, Australia                         | Australia                                |                                                         |                                                                                            |
| Sabine                            | Cornelis           |                       |                  | CUB-Hopital Erasme, Anderlecht, Belgium                               | Belgium                                  |                                                         |                                                                                            |
| Alexander Daniel                  | Cornet             |                       |                  | Medisch Spectrum Twente, Zutphen, Netherlands                         | Netherlands                              |                                                         |                                                                                            |
| Arianne Joy                       | Corpuz             |                       |                  | Al-Adan Hospital, Hadiya, Kuwait                                      | Kuwait                                   |                                                         |                                                                                            |
| Andrea                            | Cortegiani         |                       |                  | University Hospital Policlinico Paolo Giaccone, Palermo, Italy        | Italy                                    |                                                         |                                                                                            |
| Grégory                           | Corvaisier         |                       |                  | Centre Hospitalier Bretagne Atlantique, Vannes, France                | France                                   |                                                         |                                                                                            |
| Camille                           | Couffignal         |                       |                  | INSERM, Paris, France                                                 | France                                   |                                                         |                                                                                            |
| Sandrine                          | Couffin-Cadiergues |                       |                  | INSERM, Paris, France                                                 | France                                   |                                                         |                                                                                            |
| Roxane                            | Courtois           |                       |                  | Centre Hospitalier de Cholet, Cholet, France                          | France                                   |                                                         |                                                                                            |
| Stéphanie                         | Cousse             |                       |                  | Hôpital Jacques Monod, Le Havre, France                               | France                                   |                                                         |                                                                                            |
| Rachel                            | Cregan             |                       |                  | Children's Health Ireland, Dublin, Ireland                            | Ireland                                  |                                                         |                                                                                            |
| Cosimo                            | Cristella          |                       |                  | PREPARE and RECOVER EU Consortium, Belgium                            | Belgium                                  |                                                         |                                                                                            |
| Gloria                            | Crowl              |                       |                  | Michael Garron Hospital, Toronto, Canada                              | Canada                                   |                                                         |                                                                                            |
| Jonathan                          | Crump              |                       |                  | University of Utah, Salt Lake City, United States of America          | United States of America                 |                                                         |                                                                                            |
| Claudina                          | Cruz               |                       |                  | Hospital de Curry Cabral - Infectious Diseases, Lisbon, Portugal      | Portugal                                 |                                                         |                                                                                            |
| Juan Luis                         | Cruz Bermúdez      |                       |                  | Hospital 12 de Octubre, Madrid, Spain                                 | Spain                                    |                                                         |                                                                                            |
| Jaime                             | Cruz Rojo          |                       |                  | Hospital 12 de Octubre, Madrid, Spain                                 | Spain                                    |                                                         |                                                                                            |
| Marc                              | Csete              |                       |                  | Mount Sinai Medical Center, Miami, FL, United States of America       | United States of America                 |                                                         |                                                                                            |
| Ailbhe                            | Cullen             |                       |                  | Beaumont Hospital, Dublin, Ireland                                    | Ireland                                  |                                                         |                                                                                            |
| Matthew                           | Cummings           |                       |                  | Columbia University, New York, United States of America               | United States of America                 |                                                         |                                                                                            |
| Gerard                            | Curley             |                       |                  | Beaumont Hospital, Dublin, Ireland                                    | Ireland                                  |                                                         |                                                                                            |



| *First Name and Middle Initial(s) | *Last Name      | *Suffix (eg, Jr, III) | Academic Degrees | Institution                                                                         | Location (city, state/province, country) | Role or Contribution, eg, chair, principal investigator | Group (if more than 1 Group listed in the byline) and/or Subgroup (eg, Steering Committee) |
|-----------------------------------|-----------------|-----------------------|------------------|-------------------------------------------------------------------------------------|------------------------------------------|---------------------------------------------------------|--------------------------------------------------------------------------------------------|
| Elodie                            | Curlier         |                       |                  | Centre Hospitalier Universitaire de Guadeloupe, Pointe-à-Pitre, Guadeloupe          | Guadeloupe                               |                                                         |                                                                                            |
| Colleen                           | Curran          |                       |                  | Cork University Hospital, Cork, Ireland                                             | Ireland                                  |                                                         |                                                                                            |
| Paula                             | Custodio        |                       |                  | Instituto de Infectologia Emílio Ribas, Sao Paulo, Brazil                           | Brazil                                   |                                                         |                                                                                            |
| Ana                               | da Silva Filipe |                       |                  | MRC-University of Glasgow Centre for Virus Research, 464 Bearsden Road, Glasgow, UK | United Kingdom                           |                                                         |                                                                                            |
| Charlene                          | Da Silveira     |                       |                  | INSERM, Paris, France                                                               | France                                   |                                                         |                                                                                            |
| Al-Awwab                          | Dabaliz         |                       |                  | UH Cleveland Hospital, Cleveland, United States of America                          | United States of America                 |                                                         |                                                                                            |
| Andrew                            | Dagens          |                       |                  | ISARIC, Pandemic Sciences Institute, University of Oxford, Oxford, UK               | United Kingdom                           |                                                         |                                                                                            |
| John Arne                         | Dahl            |                       |                  | The Norwegian Corona Cohort, Oslo, Norway                                           | Norway                                   |                                                         |                                                                                            |
| Darren                            | Dahly           |                       |                  | University Hospital - Waterford, Waterford, Ireland                                 | Ireland                                  |                                                         |                                                                                            |
| Umberto                           | D'Alessandro    |                       |                  | Clinical Services Department Fajara, Gambia                                         | Gambia                                   |                                                         |                                                                                            |
| Peter                             | Daley           |                       |                  | Memorial University, St. John's, Newfoundland, St John's, Canada                    | Canada                                   |                                                         |                                                                                            |
| Jo                                | Dalton          |                       |                  | Oxford University (ISARIC4C), Oxford, United Kingdom                                | United Kingdom                           |                                                         |                                                                                            |
| Heidi                             | Dalton          |                       |                  | University of Queensland, Brisbane, Australia                                       | Australia                                |                                                         |                                                                                            |
| Seamus                            | Daly            |                       |                  | Galway University Hospital, Galway, Ireland                                         | Ireland                                  |                                                         |                                                                                            |
| Juliana                           | Damas           |                       |                  | Hospital Curry Cabral - Intensive Care Unit - UCIP7, Lisbon, Portugal               | Portugal                                 |                                                         |                                                                                            |
| Nick                              | Daneman         |                       |                  | Sunnybrook Health Sciences Centre, Toronto, Canada                                  | Canada                                   |                                                         |                                                                                            |
| Emmanuelle A                      | Dankwa          |                       |                  | Department of Statistics, University of Oxford, Oxford, UK                          | United Kingdom                           |                                                         |                                                                                            |
| Jorge                             | Dantas          |                       |                  | Hospital Curry Cabral - Intensive Care Unit - UCIP7, Lisbon, Portugal               | Portugal                                 |                                                         |                                                                                            |
| Frédéric                          | D'Aragon        |                       |                  | Centre hospitalier Universitaire de Sherbrooke, Sherbrooke, Canada                  | Canada                                   |                                                         |                                                                                            |

| *First Name and Middle Initial(s) | *Last Name         | *Suffix (eg, Jr, III) | Academic Degrees | Institution                                                                                                                                               | Location (city, state/province, country) | Role or Contribution, eg, chair, principal investigator | Group (if more than 1 Group listed in the byline) and/or Subgroup (eg, Steering Committee) |
|-----------------------------------|--------------------|-----------------------|------------------|-----------------------------------------------------------------------------------------------------------------------------------------------------------|------------------------------------------|---------------------------------------------------------|--------------------------------------------------------------------------------------------|
| Menno                             | de Jong            |                       |                  | PREPARE and RECOVER EU Consortium, Belgium                                                                                                                | Belgium                                  |                                                         |                                                                                            |
| Gillian                           | de Loughry         |                       |                  | University Hospital - Waterford, Waterford, Ireland                                                                                                       | Ireland                                  |                                                         |                                                                                            |
| Diego                             | de Mendoza         |                       |                  | Hospital Universitari Sagrat Cor, Barcelona, Spain                                                                                                        | Spain                                    |                                                         |                                                                                            |
| Etienne                           | De Montmollin      |                       |                  | Hôpital Bichat Claude-Bernard AP-HP, Paris, France                                                                                                        | France                                   |                                                         |                                                                                            |
| Rafael Freitas                    | de Oliveira França |                       |                  | Centro de Pesquisa Aggeu Magalhães, Fiocruz, Recife, Brazil                                                                                               | Brazil                                   |                                                         |                                                                                            |
| Ana Isabel                        | de Pinho Oliveira  |                       |                  | Centro Hospitalar de Tondela-Viseu, Viseu, Portugal                                                                                                       | Portugal                                 |                                                         |                                                                                            |
| Rosanna                           | De Rosa            |                       |                  | Monaldi Hospital, Napoli, Italy                                                                                                                           | Italy                                    |                                                         |                                                                                            |
| Cristina                          | De Rose            |                       |                  | Università Cattolica del Sacro Cuore, Rome, Italy                                                                                                         | Italy                                    |                                                         |                                                                                            |
| Thushan                           | de Silva           |                       |                  | The Florey Institute for Host-Pathogen Interactions, Department of Infection, Immunity and Cardiovascular Disease, University of Sheffield, Sheffield, UK | United Kingdom                           |                                                         |                                                                                            |
| Peter                             | de Vries           |                       |                  | Tergooi Hospital, Hilversum, Netherlands                                                                                                                  | Netherlands                              |                                                         |                                                                                            |
| Jillian                           | Deacon             |                       |                  | St Christopher's Hospital for Children, Philadelphia, United States of America                                                                            | United States of America                 |                                                         |                                                                                            |
| David                             | Dean               |                       |                  | Piedmont Atlanta Hospital, Atlanta, Georgia, United States of America                                                                                     | United States of America                 |                                                         |                                                                                            |
| Alexa                             | Debard             |                       |                  | Hôpital Purpan, Toulouse, France                                                                                                                          | France                                   |                                                         |                                                                                            |
| Bianca                            | DeBenedictis       |                       |                  | Beaumont Hospital, Dublin, Ireland                                                                                                                        | Ireland                                  |                                                         |                                                                                            |
| Marie-Pierre                      | Debray             |                       |                  | INSERM, Paris, France                                                                                                                                     | France                                   |                                                         |                                                                                            |
| Nathalie                          | DeCastro           |                       |                  | Hôpital Saint-Louis AP-HP, Paris, France                                                                                                                  | France                                   |                                                         |                                                                                            |
| William                           | Dechert            |                       |                  | Brantford General Hospital, Brantford, Canada                                                                                                             | Canada                                   |                                                         |                                                                                            |
| Romain                            | Decours            |                       |                  | Centre Hospitalier Départemental Vendée, La Roche-sur-Yon, France                                                                                         | France                                   |                                                         |                                                                                            |

| *First Name and Middle Initial(s) | *Last Name  | *Suffix (eg, Jr, III) | Academic Degrees | Institution                                                                       | Location (city, state/province, country) | Role or Contribution, eg, chair, principal investigator | Group (if more than 1 Group listed in the byline) and/or Subgroup (eg, Steering Committee) |
|-----------------------------------|-------------|-----------------------|------------------|-----------------------------------------------------------------------------------|------------------------------------------|---------------------------------------------------------|--------------------------------------------------------------------------------------------|
| Eve                               | Defous      |                       |                  | Centre Hospitalier Emile Roux, Le Puy-en-Velay, France                            | France                                   |                                                         |                                                                                            |
| Isabelle                          | Delacroix   |                       |                  | Centre Hospitalier intercommunal de Créteil, Créteil, France                      | France                                   |                                                         |                                                                                            |
| Eric                              | Delaveuve   |                       |                  | Hôpital Bel-Air, Thionville, France                                               | France                                   |                                                         |                                                                                            |
| Karen                             | Delavigne   |                       |                  | Centre Hospitalier Universitaire Toulouse (IUCT), Toulouse, France                | France                                   |                                                         |                                                                                            |
| Nathalie M.                       | Delfos      |                       |                  | Alrijne Hospital, Leiden, Netherlands                                             | Netherlands                              |                                                         |                                                                                            |
| Ionna                             | Deligiannis |                       |                  | Uniklinik University Hospital, Frankfurt, Germany                                 | Germany                                  |                                                         |                                                                                            |
| Andrea                            | Dell'Amore  |                       |                  | Policlinico of Padova, Padova, Italy                                              | Italy                                    |                                                         |                                                                                            |
| Christelle                        | Delmas      |                       |                  | INSERM, Paris, France                                                             | France                                   |                                                         |                                                                                            |
| Pierre                            | Delobel     |                       |                  | Hôpital Purpan, Toulouse, France                                                  | France                                   |                                                         |                                                                                            |
| Corine                            | Delsing     |                       |                  | Medisch Spectrum Twente, Zutphen, Netherlands                                     | Netherlands                              |                                                         |                                                                                            |
| Elisa                             | Demonchy    |                       |                  | Centre Hospitalier Universitaire de Nice (Hôpital Archet), Nice, France           | France                                   |                                                         |                                                                                            |
| Emmanuelle                        | Denis       |                       |                  | ISARIC Global Support Centre, Oxford, United Kingdom                              | United Kingdom                           |                                                         |                                                                                            |
| Dominique                         | Deplanque   |                       |                  | INSERM, Paris, France                                                             | France                                   |                                                         |                                                                                            |
| Pieter                            | Depuydt     |                       |                  | Universitair Ziekenhuis, Gent, Belgium                                            | Belgium                                  |                                                         |                                                                                            |
| Mehul                             | Desai       |                       |                  | INOVA Fairfax Medical Center, Fairfax, Virginia, United States of America         | United States of America                 |                                                         |                                                                                            |
| Diane                             | Descamps    |                       |                  | INSERM, Paris, France                                                             | France                                   |                                                         |                                                                                            |
| Mathilde                          | Desvallées  |                       |                  | INSERM, Paris, France                                                             | France                                   |                                                         |                                                                                            |
| Santi                             | Dewayanti   |                       |                  | National Cardiovascular Center Harapan Kita Jakarta Indonesia, Jakarta, Indonesia | Indonesia                                |                                                         |                                                                                            |
| Pathik                            | Dhangar     |                       |                  | All India Institute of Medical Sciences, Rishikesh, India                         | India                                    |                                                         |                                                                                            |
| Alpha                             | Diallo      |                       |                  | INSERM, Paris, France                                                             | France                                   |                                                         |                                                                                            |
| Sylvain                           | Diamantis   |                       |                  | Centre Hospitalier de Melun, Melun, France                                        | France                                   |                                                         |                                                                                            |
| André                             | Dias        |                       |                  | Hospital de Curry Cabral - Infectious Diseases, Lisbon, Portugal                  | Portugal                                 |                                                         |                                                                                            |

| *First Name and Middle Initial(s) | *Last Name    | *Suffix (eg, Jr, III) | Academic Degrees | Institution                                                                                 | Location (city, state/province, country) | Role or Contribution, eg, chair, principal investigator | Group (if more than 1 Group listed in the byline) and/or Subgroup (eg, Steering Committee) |
|-----------------------------------|---------------|-----------------------|------------------|---------------------------------------------------------------------------------------------|------------------------------------------|---------------------------------------------------------|--------------------------------------------------------------------------------------------|
| Fernanda                          | Dias Da Silva |                       |                  | INSERM, Paris, France                                                                       | France                                   |                                                         |                                                                                            |
| Juan Jose                         | Diaz          |                       |                  | Hospital Universitario Dr Negrín, Las Palmas, Spain                                         | Spain                                    |                                                         |                                                                                            |
| Rodrigo                           | Diaz          |                       |                  | Clinica Las Condes, Santiago, Chile                                                         | Chile                                    |                                                         |                                                                                            |
| Priscila                          | Diaz          |                       |                  | Hospital Professor Doutor Fernando Fonseca, Amadora, Portugal                               | Portugal                                 |                                                         |                                                                                            |
| Bakary K                          | Dibba         |                       |                  | Clinical Services Department Fajara, Gambia                                                 | Gambia                                   |                                                         |                                                                                            |
| Kévin                             | Didier        |                       |                  | Centre Hospitalier Universitaire de Reims, Reims, France                                    | France                                   |                                                         |                                                                                            |
| Jean-Luc                          | Diehl         |                       |                  | Hôpital Européen Georges-Pompidou AP-HP, Paris, France                                      | France                                   |                                                         |                                                                                            |
| Wim                               | Dieperink     |                       |                  | University Medical Center Groningen, Groningen, Netherlands                                 | Netherlands                              |                                                         |                                                                                            |
| Jérôme                            | Dimet         |                       |                  | Centre Hospitalier Mont-de-Marsan, Mont-de-Marsan, France                                   | France                                   |                                                         |                                                                                            |
| Vincent                           | Dinot         |                       |                  | Centre Hospitalier Régional Metz-Thionville, Metz, France                                   | France                                   |                                                         |                                                                                            |
| Fara                              | Diop          |                       |                  | Centre Hospitalier Intercommunal Villeneuve-Saint-Georges, Villeneuve-Saint-Georges, France | France                                   |                                                         |                                                                                            |
| Alphonsine                        | Diouf         |                       |                  | INSERM, Paris, France                                                                       | France                                   |                                                         |                                                                                            |
| Yael                              | Dishon        |                       |                  | Rambam Hospital, Haifa, Israel                                                              | Israel                                   |                                                         |                                                                                            |
| Félix                             | Djossou       |                       |                  | Centre Hospitalier Andrée Rosemon, Cayenne, French Guiana                                   | French Guiana                            |                                                         |                                                                                            |
| Annemarie B.                      | Docherty      |                       |                  | Centre for Medical Informatics, The Usher Institute, University of Edinburgh, Edinburgh, UK | United Kingdom                           |                                                         |                                                                                            |
| Helen                             | Doherty       |                       |                  | Beaumont Hospital, Dublin, Ireland                                                          | Ireland                                  |                                                         |                                                                                            |
| Arjen M                           | Dondorp       |                       |                  | CCA Network                                                                                 | Unknown                                  |                                                         |                                                                                            |
| Christl A.                        | Donnelly      |                       |                  | Department of Statistics, University of Oxford, Oxford, UK                                  | United Kingdom                           |                                                         |                                                                                            |
| Sean                              | Donohue       |                       |                  | Galway University Hospital, Galway, Ireland                                                 | Ireland                                  |                                                         |                                                                                            |
| Yoann                             | Donohue       |                       |                  | Galway University Hospital, Galway, Ireland                                                 | Ireland                                  |                                                         |                                                                                            |

| *First Name and Middle Initial(s) | *Last Name     | *Suffix (eg, Jr, III) | Academic Degrees | Institution                                                                    | Location (city, state/province, country) | Role or Contribution, eg, chair, principal investigator | Group (if more than 1 Group listed in the byline) and/or Subgroup (eg, Steering Committee) |
|-----------------------------------|----------------|-----------------------|------------------|--------------------------------------------------------------------------------|------------------------------------------|---------------------------------------------------------|--------------------------------------------------------------------------------------------|
| Peter                             | Doran          |                       |                  | St Vincents University Hospital, Dublin, Ireland                               | Ireland                                  |                                                         |                                                                                            |
| Céline                            | Dorival        |                       |                  | INSERM, Paris, France                                                          | France                                   |                                                         |                                                                                            |
| Eric                              | D'Ortenzio     |                       |                  | INSERM, Paris, France                                                          | France                                   |                                                         |                                                                                            |
| Yash                              | Doshi          |                       |                  | Long COVID India - Terna Specialty Hospital and Research Centre, Mumbai, India | India                                    |                                                         |                                                                                            |
| Phouvieng                         | Douangdala     |                       |                  | Luang Namtha Provincial Hospital, Luang Namtha, Laos                           | Laos                                     |                                                         |                                                                                            |
| James Joshua                      | Douglas        |                       |                  | Lions Gate Hospital, Vancouver, Canada                                         | Canada                                   |                                                         |                                                                                            |
| Renee                             | Douma          |                       |                  | Flevoziekenhuis, Almere, Netherlands                                           | Netherlands                              |                                                         |                                                                                            |
| Nathalie                          | Dournon        |                       |                  | Hôpital Avicenne, Bobigny, France                                              | France                                   |                                                         |                                                                                            |
| Joanne                            | Downey         |                       |                  | St Vincents University Hospital, Dublin, Ireland                               | Ireland                                  |                                                         |                                                                                            |
| Mark                              | Downing        |                       |                  | St Joseph's Health Center, Sherbrooke, Canada                                  | Canada                                   |                                                         |                                                                                            |
| Thomas                            | Drake          |                       |                  | Oxford University (ISARIC4C), Oxford, United Kingdom                           | United Kingdom                           |                                                         |                                                                                            |
| Aoife                             | Driscoll       |                       |                  | University Hospital - Limerick, Limerick, Ireland                              | Ireland                                  |                                                         |                                                                                            |
| Amiel A.                          | Dror           |                       |                  | Bar-Ilan University, Ramat Gan, Israel                                         | Israel                                   |                                                         |                                                                                            |
| Murray                            | Dryden         |                       |                  | National Institute for Communicable Diseases, Johannesburg, South Africa       | South Africa                             |                                                         |                                                                                            |
| Claudio                           | Duarte Fonseca |                       |                  | Centro de Pesquisa Aggeu Magalhães, Fiocruz, Recife, Brazil                    | Brazil                                   |                                                         |                                                                                            |
| Vincent                           | Dubee          |                       |                  | Centre Hospitalier Universitaire d'Angers, Angers, France                      | France                                   |                                                         |                                                                                            |
| François                          | Dubos          |                       |                  | INSERM, Paris, France                                                          | France                                   |                                                         |                                                                                            |
| Audrey                            | Dubot-Pérès    |                       |                  | Salavan Provincial Hospital, Salavan, Laos                                     | Laos                                     |                                                         |                                                                                            |
| Alexandre                         | Ducancelle     |                       |                  | Centre Hospitalier Universitaire d'Angers, Angers, France                      | France                                   |                                                         |                                                                                            |
| Toni                              | Duculan        |                       |                  | Houston Methodist Hospital, Texas, United States of America                    | United States of America                 |                                                         |                                                                                            |
| Susanne                           | Dudman         |                       |                  | Oslo University Hospital, Oslo, Norway                                         | Norway                                   |                                                         |                                                                                            |

| *First Name and Middle Initial(s) | *Last Name            | *Suffix (eg, Jr, III) | Academic Degrees | Institution                                                                  | Location (city, state/province, country) | Role or Contribution, eg, chair, principal investigator | Group (if more than 1 Group listed in the byline) and/or Subgroup (eg, Steering Committee) |
|-----------------------------------|-----------------------|-----------------------|------------------|------------------------------------------------------------------------------|------------------------------------------|---------------------------------------------------------|--------------------------------------------------------------------------------------------|
| Abhijit                           | Duggal                |                       |                  | Cleveland Clinic, Ohio, Ohio, OH, United States of America                   | United States of America                 |                                                         |                                                                                            |
| Paul                              | Dunand                |                       |                  | Hôpital Bel-Air, Thionville, France                                          | France                                   |                                                         |                                                                                            |
| Jake                              | Dunning               |                       |                  | ISARIC, Pandemic Sciences Institute, University of Oxford, Oxford, UK        | United Kingdom                           |                                                         |                                                                                            |
| Mathilde                          | Duplaix               |                       |                  | Hospital du Sacre Coeur, Montreal, Canada                                    | Canada                                   |                                                         |                                                                                            |
| Emanuele                          | Durante-Mangoni       |                       |                  | University of Campania, Carseta, Italy                                       | Italy                                    |                                                         |                                                                                            |
| Lucian                            | Durham III            |                       |                  | Medical College of Wisconsin, Wisconsin, United States of America            | United States of America                 |                                                         |                                                                                            |
| Bertrand                          | Dussol                |                       |                  | Hôpital de la Conception, Marseille, France                                  | France                                   |                                                         |                                                                                            |
| Juliette                          | Duthoit               |                       |                  | Centre Hospitalier de Tourcoing, Tourcoing, France                           | France                                   |                                                         |                                                                                            |
| Xavier                            | Duval                 |                       |                  | INSERM, Paris, France                                                        | France                                   |                                                         |                                                                                            |
| Anne Margarita                    | Dyrhol-Riise          |                       |                  | Oslo University Hospital, Oslo, Norway                                       | Norway                                   |                                                         |                                                                                            |
| Sim Choon                         | Ean                   |                       |                  | Pulau Pinang Hospital, Pulau Pinang, Malaysia                                | Malaysia                                 |                                                         |                                                                                            |
| Marco                             | Echeverria-Villalobos |                       |                  | Ohio State University, Columbus, United States of America                    | United States of America                 |                                                         |                                                                                            |
| Michael                           | Edelstein             |                       |                  | Follow Up Study Working Group, United Kingdom                                | United Kingdom                           |                                                         |                                                                                            |
| Siobhan                           | Egan                  |                       |                  | University Hospital - Limerick, Limerick, Ireland                            | Ireland                                  |                                                         |                                                                                            |
| Linn Margrete                     | Eggesbø               |                       |                  | The Norwegian Corona Cohort, Oslo, Norway                                    | Norway                                   |                                                         |                                                                                            |
| Carla                             | Eira                  |                       |                  | Centro Hospitalar de Tondela-Viseu, Viseu, Portugal                          | Portugal                                 |                                                         |                                                                                            |
| Mohammed                          | El Sanharawi          |                       |                  | Centre Hospitalier De Chateaudun, Route De Jallans, 28200 Chateaudun, France | France                                   |                                                         |                                                                                            |
| Subbarao                          | Elapavaluru           |                       |                  | Allegheny General Hospital, Pittsburgh, United States of America             | United States of America                 |                                                         |                                                                                            |
| Brigitte                          | Elharrar              |                       |                  | Centre Hospitalier intercommunal de Créteil, Créteil, France                 | France                                   |                                                         |                                                                                            |
| Jacobien                          | Ellerbroek            |                       |                  | Reinier de Graaf Gasthuis, Delft, Netherlands                                | Netherlands                              |                                                         |                                                                                            |
| Merete                            | Ellingjord-Dale       |                       |                  | The Norwegian Corona Cohort, Oslo, Norway                                    | Norway                                   |                                                         |                                                                                            |

| *First Name and Middle Initial(s) | *Last Name      | *Suffix (eg, Jr, III) | Academic Degrees | Institution                                                                            | Location (city, state/province, country) | Role or Contribution, eg, chair, principal investigator | Group (if more than 1 Group listed in the byline) and/or Subgroup (eg, Steering Committee) |
|-----------------------------------|-----------------|-----------------------|------------------|----------------------------------------------------------------------------------------|------------------------------------------|---------------------------------------------------------|--------------------------------------------------------------------------------------------|
| Loubna                            | Elotmani        |                       |                  | CHU Carémeau, Nimes, France                                                            | France                                   |                                                         |                                                                                            |
| Philippine                        | Eloy            |                       |                  | INSERM, Paris, France                                                                  | France                                   |                                                         |                                                                                            |
| Tarek                             | Elshazly        |                       |                  | UH Cleveland Hospital, Cleveland, United States of America                             | United States of America                 |                                                         |                                                                                            |
| Iqbal                             | Elyazar         |                       |                  | Pratama Rada Bolo Hospital, Karitas Hospital and Waikabubak Hospital, Sumba, Indonesia | Indonesia                                |                                                         |                                                                                            |
| Isabelle                          | Enderle         |                       |                  | Centre Hospitalier Universitaire Rennes (Hôpital Sud), Rennes, France                  | France                                   |                                                         |                                                                                            |
| Tomoyuki                          | Endo            |                       |                  | Tohoku Medical and Pharmaceutical University, Sendai, Japan                            | Japan                                    |                                                         |                                                                                            |
| Chan Chee                         | Eng             |                       |                  | Kuala Lumpur Hospital, WPKL, Malaysia                                                  | Malaysia                                 |                                                         |                                                                                            |
| Ilka                              | Engelmann       |                       |                  | Centre Hospitalier Universitaire de Lille, Lille, France                               | France                                   |                                                         |                                                                                            |
| Vincent                           | Enouf           |                       |                  | INSERM, Paris, France                                                                  | France                                   |                                                         |                                                                                            |
| Olivier                           | Epaulard        |                       |                  | Centre Hospitalier Universitaire Grenoble-Alpes, Grenoble, France                      | France                                   |                                                         |                                                                                            |
| Martina                           | Escher          |                       |                  | ISARIC, Pandemic Sciences Institute, University of Oxford, Oxford, UK                  | United Kingdom                           |                                                         |                                                                                            |
| Mariano                           | Esperatti       |                       |                  | Mar del Plata Medical Foundation Private Community Hospital, Mar Del Plata, Argentina  | Argentina                                |                                                         |                                                                                            |
| Hélène                            | Esperou         |                       |                  | INSERM, Paris, France                                                                  | France                                   |                                                         |                                                                                            |
| Catarina                          | Espírito Santo  |                       |                  | Hospital Curry Cabral - Intensive Care Unit - UCIP7, Lisbon, Portugal                  | Portugal                                 |                                                         |                                                                                            |
| Marina                            | Esposito-Farese |                       |                  | INSERM, Paris, France                                                                  | France                                   |                                                         |                                                                                            |
| João                              | Estevão         |                       |                  | Hospital Curry Cabral - Intensive Care Unit - UCIP7, Lisbon, Portugal                  | Portugal                                 |                                                         |                                                                                            |
| Manuel                            | Etienne         |                       |                  | INSERM, Paris, France                                                                  | France                                   |                                                         |                                                                                            |
| Anna Greti                        | Everding        |                       |                  | Hospitales Puerta de Hierro, Jalisco, Mexico                                           | Mexico                                   |                                                         |                                                                                            |
| Mirjam                            | Evers           |                       |                  | Canisius Wilhelmina Ziekenhuis, Nijmegen, Netherlands                                  | Netherlands                              |                                                         |                                                                                            |
| Marc                              | Fabre           |                       |                  | Centre Hospitalier Pierre Oudot, Bourgoin-Jallieu, France                              | France                                   |                                                         |                                                                                            |

| *First Name and Middle Initial(s) | *Last Name      | *Suffix (eg, Jr, III) | Academic Degrees | Institution                                                                                       | Location (city, state/province, country) | Role or Contribution, eg, chair, principal investigator | Group (if more than 1 Group listed in the byline) and/or Subgroup (eg, Steering Committee) |
|-----------------------------------|-----------------|-----------------------|------------------|---------------------------------------------------------------------------------------------------|------------------------------------------|---------------------------------------------------------|--------------------------------------------------------------------------------------------|
| Isabelle                          | Fabre           |                       |                  | Centre Hospitalier Universitaire de Guadeloupe, Pointe-à-Pitre, Guadeloupe                        | Guadeloupe                               |                                                         |                                                                                            |
| Ismaila                           | Fadera          |                       |                  | Clinical Services Department Fajara, Gambia                                                       | Gambia                                   |                                                         |                                                                                            |
| Amna                              | Faheem          |                       |                  | North York General Hospital, Toronto, Canada                                                      | Canada                                   |                                                         |                                                                                            |
| Arabella                          | Fahy            |                       |                  | Tallaght University Hospital, Dublin, Ireland                                                     | Ireland                                  |                                                         |                                                                                            |
| Cameron J.                        | Fairfield       |                       |                  | Oxford University (ISARIC4C), Oxford, United Kingdom                                              | United Kingdom                           |                                                         |                                                                                            |
| Pedro                             | Faria           |                       |                  | Hospital Curry Cabral - Intensive Care Unit - UCIP7, Lisbon, Portugal                             | Portugal                                 |                                                         |                                                                                            |
| Hanan                             | Fateena         |                       |                  | Sungai Buloh Hospital, Selangor, Malaysia                                                         | Malaysia                                 |                                                         |                                                                                            |
| Arie Zainul                       | Fatoni          |                       |                  | Adult ICU Saiful Anwar Hospital, Malang, Indonesia                                                | Indonesia                                |                                                         |                                                                                            |
| Karine                            | Faure           |                       |                  | Centre Hospitalier Universitaire de Lille, Lille, France                                          | France                                   |                                                         |                                                                                            |
| Raphaël                           | Favory          |                       |                  | Centre Hospitalier Universitaire de Lille, Lille, France                                          | France                                   |                                                         |                                                                                            |
| Mohamed                           | Fayed           |                       |                  | University of California San Francisco - Fresno, Fresno, United States of America                 | United States of America                 |                                                         |                                                                                            |
| Niamh                             | Feely           |                       |                  | University Hospital, Kerry, Ireland                                                               | Ireland                                  |                                                         |                                                                                            |
| Jorge                             | Fernandes       |                       |                  | Hospital Curry Cabral - Intensive Care Unit - UCIP7, Lisbon, Portugal                             | Portugal                                 |                                                         |                                                                                            |
| Marília Andreia                   | Fernandes       |                       |                  | Hospital Curry Cabral - Intensive Care Unit - UCIP7, Lisbon, Portugal                             | Portugal                                 |                                                         |                                                                                            |
| Susana                            | Fernandes       |                       |                  | Hospital Santa Maria, Centro Hospitalar Universitário Lisboa Norte, Amadora, Portugal             | Portugal                                 |                                                         |                                                                                            |
| François-Xavier                   | Ferrand         |                       |                  | Centre Hospitalier Techer, Calais, France                                                         | France                                   |                                                         |                                                                                            |
| Eglantine                         | Ferrand Devouge |                       |                  | Centre Hospitalier Universitaire Rouen (Center Hospitalier Universitaire de Rouen), Rouen, France | France                                   |                                                         |                                                                                            |
| Joana                             | Ferrão          |                       |                  | Hospital Curry Cabral - Intensive Care Unit - UCIP7, Lisbon, Portugal                             | Portugal                                 |                                                         |                                                                                            |



| *First Name and Middle Initial(s) | *Last Name       | *Suffix (eg, Jr, III) | Academic Degrees | Institution                                                               | Location (city, state/province, country) | Role or Contribution, eg, chair, principal investigator | Group (if more than 1 Group listed in the byline) and/or Subgroup (eg, Steering Committee) |
|-----------------------------------|------------------|-----------------------|------------------|---------------------------------------------------------------------------|------------------------------------------|---------------------------------------------------------|--------------------------------------------------------------------------------------------|
| Mário                             | Ferraz           |                       |                  | Hospital Curry Cabral - Intensive Care Unit - UCIP7, Lisbon, Portugal     | Portugal                                 |                                                         |                                                                                            |
| Sílvia                            | Ferreira         |                       |                  | Comissão de Ética - Unidade Local de Saúde de Matosinhos, Porto, Portugal | Portugal                                 |                                                         |                                                                                            |
| Bernardo                          | Ferreira         |                       |                  | Hospital Curry Cabral - Intensive Care Unit - UCIP7, Lisbon, Portugal     | Portugal                                 |                                                         |                                                                                            |
| Benigno                           | Ferreira         |                       |                  | Hospitales Puerta de Hierro, Jalisco, Mexico                              | Mexico                                   |                                                         |                                                                                            |
| Isabel                            | Ferreira         |                       |                  | Hospital Professor Doutor Fernando Fonseca, Amadora, Portugal             | Portugal                                 |                                                         |                                                                                            |
| Nicolas                           | Ferriere         |                       |                  | Centre Hospitalier Universitaire de Brest, Brest, France                  | France                                   |                                                         |                                                                                            |
| Céline                            | Ficko            |                       |                  | Hôpital d'Instruction des Armées Bégin, Saint-Mandé, France               | France                                   |                                                         |                                                                                            |
| Claudia                           | Figueiredo-Mello |                       |                  | Instituto de Infectologia Emílio Ribas, Brazil                            | Brazil                                   |                                                         |                                                                                            |
| William                           | Finlayson        |                       |                  | St Bernard's Hospital, Gibraltar, Gibraltar                               | Gibraltar                                |                                                         |                                                                                            |
| Thomas                            | Flament          |                       |                  | Centre Hospitalier Régional et Universitaire de Tours, Tours, France      | France                                   |                                                         |                                                                                            |
| Tom                               | Fletcher         |                       |                  | Liverpool School of Tropical Medicine, Liverpool, UK                      | United Kingdom                           |                                                         |                                                                                            |
| Aline-Marie                       | Florence         |                       |                  | Hôpital Bichat Claude-Bernard AP-HP, Paris, France                        | France                                   |                                                         |                                                                                            |
| Letizia Lucia                     | Florio           |                       |                  | University of Campania, Carseta, Italy                                    | Italy                                    |                                                         |                                                                                            |
| Deirdre                           | Flynn            |                       |                  | Cork University Hospital, Cork, Ireland                                   | Ireland                                  |                                                         |                                                                                            |
| Brigid                            | Flynn            |                       |                  | University of Kansas Medical Center, Kansas, United States of America     | United States of America                 |                                                         |                                                                                            |
| Jean                              | Foley            |                       |                  | Cork University Hospital, Cork, Ireland                                   | Ireland                                  |                                                         |                                                                                            |
| Victor                            | Fomin            |                       |                  | Sechenov University, Moscow, Russia                                       | Russia                                   |                                                         |                                                                                            |
| Tatiana                           | Fonseca          |                       |                  | Centro Hospitalar Vila Nova de Gaia/Espinho, Espinho, Portugal            | Portugal                                 |                                                         |                                                                                            |
| Patricia                          | Fontela          |                       |                  | The Montreal Children's Hospital, Montreal, Canada                        | Canada                                   |                                                         |                                                                                            |
| Karen                             | Forrest          |                       |                  | Clinical Services Department Fajara, Gambia                               | Gambia                                   |                                                         |                                                                                            |

| *First Name and Middle Initial(s) | *Last Name      | *Suffix (eg, Jr, III) | Academic Degrees | Institution                                                                           | Location (city, state/province, country) | Role or Contribution, eg, chair, principal investigator | Group (if more than 1 Group listed in the byline) and/or Subgroup (eg, Steering Committee) |
|-----------------------------------|-----------------|-----------------------|------------------|---------------------------------------------------------------------------------------|------------------------------------------|---------------------------------------------------------|--------------------------------------------------------------------------------------------|
| Simon                             | Forsyth         |                       |                  | University of Queensland, Brisbane, Australia                                         | Australia                                |                                                         |                                                                                            |
| Denise                            | Foster          |                       |                  | Vancouver General Hospital, Vancouver, Canada                                         | Canada                                   |                                                         |                                                                                            |
| Giuseppe                          | Foti            |                       |                  | Ospedale San Gerardo, Monza, Italy                                                    | Italy                                    |                                                         |                                                                                            |
| Erwan                             | Fourn           |                       |                  | Hôpital Foch, Suresnes, France                                                        | France                                   |                                                         |                                                                                            |
| Robert A.                         | Fowler          |                       |                  | University of Toronto, Toronto, Canada                                                | Canada                                   |                                                         |                                                                                            |
| Marianne                          | Fraher          |                       |                  | Bon Secours Hospital, Cork, Ireland                                                   | Ireland                                  |                                                         |                                                                                            |
| Diego                             | Franch-Llasat   |                       |                  | Hospital Verge de la Cinta, Tortosa, Spain                                            | Spain                                    |                                                         |                                                                                            |
| John F.                           | Fraser          |                       |                  | University of Queensland, Brisbane, Australia                                         | Australia                                |                                                         |                                                                                            |
| Christophe                        | Fraser          |                       |                  | ISARIC Global Support Centre, Oxford, United Kingdom                                  | United Kingdom                           |                                                         |                                                                                            |
| Marcela Vieira                    | Freire          |                       |                  | Centro de Pesquisa Aggeu Magalhães, Fiocruz, Recife, Brazil                           | Brazil                                   |                                                         |                                                                                            |
| Ana                               | Freitas Ribeiro |                       |                  | Instituto de Infectologia Emílio Ribas, Sao Paulo, Brazil                             | Brazil                                   |                                                         |                                                                                            |
| Caren                             | Friedrich       |                       |                  | Hospital Escola da Universidade Federal de Pelotas, Pelotas, Brazil                   | Brazil                                   |                                                         |                                                                                            |
| Ricardo                           | Fritz           |                       |                  | Instituto Nacional Del Tórax, Santiago, Chile                                         | Chile                                    |                                                         |                                                                                            |
| Stéphanie                         | Fry             |                       |                  | Hôpital Albert Calmette, Lille, France                                                | France                                   |                                                         |                                                                                            |
| Nora                              | Fuentes         |                       |                  | Mar del Plata Medical Foundation Private Community Hospital, Mar Del Plata, Argentina | Argentina                                |                                                         |                                                                                            |
| Masahiro                          | Fukuda          |                       |                  | Saiseikai Senri Hospital, Tochigi, Japan                                              | Japan                                    |                                                         |                                                                                            |
| Argin                             | G               |                       |                  | Manipal Hospital Whitefield, Bangalore, India                                         | India                                    |                                                         |                                                                                            |
| Valérie                           | Gaborieau       |                       |                  | Centre Hospitalier de Pau, Pau, France                                                | France                                   |                                                         |                                                                                            |
| Rostane                           | Gaci            |                       |                  | Centre Hospitalier Régional Metz-Thionville, Metz, France                             | France                                   |                                                         |                                                                                            |
| Massimo                           | Gagliardi       |                       |                  | University of Campania, Carseta, Italy                                                | Italy                                    |                                                         |                                                                                            |
| Jean-Charles                      | Gagnard         |                       |                  | Hôpital privé d'Antony, Antony, France                                                | France                                   |                                                         |                                                                                            |
| Amandine                          | Gagneux-Brunon  |                       |                  | Centre Hospitalier Universitaire de Saint-Étienne, Saint-Étienne, France              | France                                   |                                                         |                                                                                            |
| Abdou                             | Gai             |                       |                  | Clinical Services Department Fajara, Gambia                                           | Gambia                                   |                                                         |                                                                                            |
| Sérgio                            | Gaião           |                       |                  | São João Hospital Centre, Porto, Portugal                                             | Portugal                                 |                                                         |                                                                                            |
| Linda                             | Gail Skeie      |                       |                  | Oslo University Hospital, Oslo, Norway                                                | Norway                                   |                                                         |                                                                                            |

| *First Name and Middle Initial(s) | *Last Name      | *Suffix (eg, Jr, III) | Academic Degrees | Institution                                                                              | Location (city, state/province, country) | Role or Contribution, eg, chair, principal investigator | Group (if more than 1 Group listed in the byline) and/or Subgroup (eg, Steering Committee) |
|-----------------------------------|-----------------|-----------------------|------------------|------------------------------------------------------------------------------------------|------------------------------------------|---------------------------------------------------------|--------------------------------------------------------------------------------------------|
| Phil                              | Gallagher       |                       |                  | St Vincents University Hospital, Dublin, Ireland                                         | Ireland                                  |                                                         |                                                                                            |
| Carrol                            | Gamble          |                       |                  | Oxford University (ISARIC4C), Oxford, United Kingdom                                     | United Kingdom                           |                                                         |                                                                                            |
| Yasmin                            | Gani            |                       |                  | Sungai Buloh Hospital, Selangor, Malaysia                                                | Malaysia                                 |                                                         |                                                                                            |
| Arthur                            | Garan           |                       |                  | Beth Israel Deaconess Medical Center, Boston, United States of America                   | United States of America                 |                                                         |                                                                                            |
| Rebekha                           | Garcia          |                       |                  | University of California San Francisco - Fresno, Fresno, United States of America        | United States of America                 |                                                         |                                                                                            |
| Noelia                            | García Barrio   |                       |                  | Hospital 12 de Octubre, Madrid, Spain                                                    | Spain                                    |                                                         |                                                                                            |
| Julia                             | Garcia-Diaz     |                       |                  | Ochsner Clinic Foundation, New Orleans, United States of America                         | United States of America                 |                                                         |                                                                                            |
| Esteban                           | Garcia-Gallo    |                       |                  | Clinica Universidad de La Sabana, Chia, Colombia                                         | Colombia                                 |                                                         |                                                                                            |
| Navya                             | Garimella       |                       |                  | University of Washington Medical Center - Northwest, Seattle, United States of America   | United States of America                 |                                                         |                                                                                            |
| Denis                             | Garot           |                       |                  | Centre Hospitalier Régional et Universitaire de Tours, Tours, France                     | France                                   |                                                         |                                                                                            |
| Valérie                           | Garrait         |                       |                  | Centre Hospitalier intercommunal de Créteil, Créteil, France                             | France                                   |                                                         |                                                                                            |
| Anatoliy                          | Gavrylov        |                       |                  | Lugansk State Medical University - Department of Internal Medicine No2, Lugansk, Ukraine | Ukraine                                  |                                                         |                                                                                            |
| Alexandre                         | Gaymard         |                       |                  | INSERM, Paris, France                                                                    | France                                   |                                                         |                                                                                            |
| Johannes                          | Gebauer         |                       |                  | Klinikum Passau, Germant, Germany                                                        | Germany                                  |                                                         |                                                                                            |
| Eva                               | Geraud          |                       |                  | Centre Hospitalier Emile Roux, Le Puy-en-Velay, France                                   | France                                   |                                                         |                                                                                            |
| Louis                             | Gerbaud Morlaes |                       |                  | Centre Hospitalier Mont-de-Marsan, Mont-de-Marsan, France                                | France                                   |                                                         |                                                                                            |
| Nuno                              | Germano         |                       |                  | Hospital Curry Cabral - Intensive Care Unit - UCIP7, Lisbon, Portugal                    | Portugal                                 |                                                         |                                                                                            |
| Praveen Kumar                     | Ghisulal        |                       |                  | Cleveland Clinic Abu Dhabi, Abu Dhabi, United Arab Emirates                              | United Arab Emirates                     |                                                         |                                                                                            |

| <b>*First Name and Middle Initial(s)</b> | <b>*Last Name</b> | <b>*Suffix (eg, Jr, III)</b> | <b>Academic Degrees</b> | <b>Institution</b>                                                                             | <b>Location (city, state/province, country)</b> | <b>Role or Contribution, eg, chair, principal investigator</b> | <b>Group (if more than 1 Group listed in the byline) and/or Subgroup (eg, Steering Committee)</b> |
|------------------------------------------|-------------------|------------------------------|-------------------------|------------------------------------------------------------------------------------------------|-------------------------------------------------|----------------------------------------------------------------|---------------------------------------------------------------------------------------------------|
| Jade                                     | Ghosn             |                              |                         | INSERM, Paris, France                                                                          | France                                          |                                                                |                                                                                                   |
| Marco                                    | Giani             |                              |                         | Ospedale San Gerardo, Monza, Italy                                                             | Italy                                           |                                                                |                                                                                                   |
| Tristan                                  | Gigante           |                              |                         | INSERM, Paris, France                                                                          | France                                          |                                                                |                                                                                                   |
| Elaine                                   | Gilroy            |                              |                         | Mater Misericordiae University, Dublin, Ireland                                                | Ireland                                         |                                                                |                                                                                                   |
| Guillermo                                | Giordano          |                              |                         | Centre Hospitalier Henri Duffaut, Avignon, France                                              | France                                          |                                                                |                                                                                                   |
| Michelle                                 | Girvan            |                              |                         | Oxford University (ISARIC4C), Oxford, United Kingdom                                           | United Kingdom                                  |                                                                |                                                                                                   |
| Valérie                                  | Gissot            |                              |                         | Centre Hospitalier Régional et Universitaire de Tours, Tours, France                           | France                                          |                                                                |                                                                                                   |
| Daniel                                   | Glikman           |                              |                         | The Baruch Padeh Medical Center Poriya, Tiberias, Israel                                       | Israel                                          |                                                                |                                                                                                   |
| Petr                                     | Glybochko         |                              |                         | Sechenov University, Moscow, Russia                                                            | Russia                                          |                                                                |                                                                                                   |
| Eric                                     | Gnall             |                              |                         | Lankenau Institute of Medical Research, Wynnewood, United States of America                    | United States of America                        |                                                                |                                                                                                   |
| Geraldine                                | Goco              |                              |                         | The Hospital for Sick Children (SickKids), Toronto, Canada                                     | Canada                                          |                                                                |                                                                                                   |
| François                                 | Goehringer        |                              |                         | Centre Hospitalier Régional et Universitaire de Nancy - Hôpitaux de Brabois, Nancy, France     | France                                          |                                                                |                                                                                                   |
| Siri                                     | Goepel            |                              |                         | University Hospital of Tubingen, Tubingen, Germany                                             | Germany                                         |                                                                |                                                                                                   |
| Jean-Christophe                          | Goffard           |                              |                         | CUB-Hôpital Erasme, Bruxelles, Belgium                                                         | Belgium                                         |                                                                |                                                                                                   |
| Jin Yi                                   | Goh               |                              |                         | Permai Hospital, Johor, Malaysia                                                               | Malaysia                                        |                                                                |                                                                                                   |
| Jonathan                                 | Golob             |                              |                         | University of Michigan Schools of Medicine & Public Health, AnnArbor, United States of America | United States of America                        |                                                                |                                                                                                   |
| Rui                                      | Gomes             |                              |                         | Hospital Garcia de Orta, Almada, Portugal                                                      | Portugal                                        |                                                                |                                                                                                   |
| Kyle                                     | Gomez             |                              |                         | St Bernard's Hospital, Gibraltar, Gibraltar                                                    | Gibraltar                                       |                                                                |                                                                                                   |

| *First Name and Middle Initial(s) | *Last Name    | *Suffix (eg, Jr, III) | Academic Degrees | Institution                                                                                                                                                                                                                                                              | Location (city, state/province, country) | Role or Contribution, eg, chair, principal investigator | Group (if more than 1 Group listed in the byline) and/or Subgroup (eg, Steering Committee) |
|-----------------------------------|---------------|-----------------------|------------------|--------------------------------------------------------------------------------------------------------------------------------------------------------------------------------------------------------------------------------------------------------------------------|------------------------------------------|---------------------------------------------------------|--------------------------------------------------------------------------------------------|
| Joan                              | Gómez-Junyent |                       |                  | Department of Infectious Diseases, Hospital del Mar, Infectious Pathology and Antimicrobial Research Group (IPAR), Institut Hospital del Mar d'Investigacions Mèdiques (IMIM), Universitat Autònoma de Barcelona (UAB), CEXS-Universitat Pompeu Fabra, Barcelona, Spain. | Spain                                    |                                                         |                                                                                            |
| Marie                             | Gominet       |                       |                  | Hôpital d'Instruction des Armées Bégin, Saint-Mandé, France                                                                                                                                                                                                              | France                                   |                                                         |                                                                                            |
| Alicia                            | Gonzalez      |                       |                  | Ohio State University, Columbus, United States of America                                                                                                                                                                                                                | United States of America                 |                                                         |                                                                                            |
| Patricia                          | Gordon        |                       |                  | Wexford General Hospital, Wexford, Ireland                                                                                                                                                                                                                               | Ireland                                  |                                                         |                                                                                            |
| Yanay                             | Gorelik       |                       |                  | Bar-Ilan University, Ramat Gan, Israel                                                                                                                                                                                                                                   | Israel                                   |                                                         |                                                                                            |
| Isabelle                          | Gorenne       |                       |                  | INSERM, Paris, France                                                                                                                                                                                                                                                    | France                                   |                                                         |                                                                                            |
| Laure                             | Goubert       |                       |                  | Hôpital Jacques Monod, Le Havre, France                                                                                                                                                                                                                                  | France                                   |                                                         |                                                                                            |
| Cécile                            | Goujard       |                       |                  | Hôpital Kremlin-Bicêtre, Le Kremlin-Bicêtre, France                                                                                                                                                                                                                      | France                                   |                                                         |                                                                                            |
| Tiphaine                          | Goulenok      |                       |                  | Hôpital Bichat Claude-Bernard AP-HP, Paris, France                                                                                                                                                                                                                       | France                                   |                                                         |                                                                                            |
| Margarite                         | Grable        |                       |                  | Baylor Scott & White Health, Temple, United States of America                                                                                                                                                                                                            | United States of America                 |                                                         |                                                                                            |
| Jeronimo                          | Graf          |                       |                  | Clinica Alemana DeSantiago, Santiago, Chile                                                                                                                                                                                                                              | Chile                                    |                                                         |                                                                                            |
| Edward Wilson                     | Grandin       |                       |                  | Beth Israel Deaconess Medical Center, Boston, United States of America                                                                                                                                                                                                   | United States of America                 |                                                         |                                                                                            |
| Pascal                            | Granier       |                       |                  | Centre Hospitalier du Pays d'Aix, Aix-en-Provence, France                                                                                                                                                                                                                | France                                   |                                                         |                                                                                            |
| Giacomo                           | Grasselli     |                       |                  | Fondazione IRCCS Ca, Milan, Italy                                                                                                                                                                                                                                        | Italy                                    |                                                         |                                                                                            |
| Christopher A.                    | Green         |                       |                  | Institute of Microbiology and Infection, University of Birmingham, Birmingham, UK                                                                                                                                                                                        | United Kingdom                           |                                                         |                                                                                            |
| Courtney                          | Greene        |                       |                  | Children's Health Ireland, Dublin, Ireland                                                                                                                                                                                                                               | Ireland                                  |                                                         |                                                                                            |
| William                           | Greenhalf     |                       |                  | Oxford University (ISARIC4C), Oxford, United Kingdom                                                                                                                                                                                                                     | United Kingdom                           |                                                         |                                                                                            |

| *First Name and Middle Initial(s) | *Last Name          | *Suffix (eg, Jr, III) | Academic Degrees | Institution                                                                                  | Location (city, state/province, country) | Role or Contribution, eg, chair, principal investigator | Group (if more than 1 Group listed in the byline) and/or Subgroup (eg, Steering Committee) |
|-----------------------------------|---------------------|-----------------------|------------------|----------------------------------------------------------------------------------------------|------------------------------------------|---------------------------------------------------------|--------------------------------------------------------------------------------------------|
| Segolène                          | Greffe              |                       |                  | Centre Hospitalier Universitaire Ambroise-Paré, Boulogne-Billancourt, France                 | France                                   |                                                         |                                                                                            |
| Domenico Luca                     | Grieco              |                       |                  | Fondazione Policlinico Universitario Agostino Gemelli IRCCS, Rome, Italy                     | Italy                                    |                                                         |                                                                                            |
| Matthew                           | Griffee             |                       |                  | University of Utah, Salt Lake City, United States of America                                 | United States of America                 |                                                         |                                                                                            |
| Fiona                             | Griffiths           |                       |                  | Oxford University (ISARIC4C), Oxford, United Kingdom                                         | United Kingdom                           |                                                         |                                                                                            |
| Ioana                             | Grigoras            |                       |                  | Grigore T Popa University of Medicine and Pharmacy, Bucharest, Romania                       | Romania                                  |                                                         |                                                                                            |
| Albert                            | Groenendijk         |                       |                  | Erasmus Medical Centre, Rotterdam, Netherlands                                               | Netherlands                              |                                                         |                                                                                            |
| Heidi                             | Gruner              |                       |                  | Hospital de Curry Cabral - Internal Medicine, Lisbon, Portugal                               | Portugal                                 |                                                         |                                                                                            |
| Yusing                            | Gu                  |                       |                  | McGill University Health Centre, Montreal, Canada                                            | Canada                                   |                                                         |                                                                                            |
| Jérémie                           | Guedj               |                       |                  | INSERM, Paris, France                                                                        | France                                   |                                                         |                                                                                            |
| Martin                            | Guego               |                       |                  | Centre Hospitalier Techer, Calais, France                                                    | France                                   |                                                         |                                                                                            |
| Anne-Marie                        | Guerguerian         |                       |                  | The Hospital for Sick Children (SickKids), Toronto, Canada                                   | Canada                                   |                                                         |                                                                                            |
| Daniela                           | Guerreiro           |                       |                  | Hospital Curry Cabral - Intensive Care Unit - UCIP7, Lisbon, Portugal                        | Portugal                                 |                                                         |                                                                                            |
| Romain                            | Guery               |                       |                  | Centre Hospitalier Universitaire de Nantes (Hôpital femme-enfant-adolescent), Nantes, France | France                                   |                                                         |                                                                                            |
| Anne                              | Guillaumot          |                       |                  | Centre Hospitalier Régional et Universitaire de Nancy - Hôpitaux de Brabois, Nancy, France   | France                                   |                                                         |                                                                                            |
| Laurent                           | Guilleminault       |                       |                  | Centre Hospitalier Universitaire Toulouse (Larrey), Toulouse, France                         | France                                   |                                                         |                                                                                            |
| Maisa                             | Guimarães de Castro |                       |                  | Hospital de Amor, Sao Paulo, Brazil                                                          | Brazil                                   |                                                         |                                                                                            |

| *First Name and Middle Initial(s) | *Last Name  | *Suffix (eg, Jr, III) | Academic Degrees | Institution                                                                           | Location (city, state/province, country) | Role or Contribution, eg, chair, principal investigator | Group (if more than 1 Group listed in the byline) and/or Subgroup (eg, Steering Committee) |
|-----------------------------------|-------------|-----------------------|------------------|---------------------------------------------------------------------------------------|------------------------------------------|---------------------------------------------------------|--------------------------------------------------------------------------------------------|
| Thomas                            | Guimard     |                       |                  | Centre Hospitalier Départemental Vendée, La Roche-sur-Yon, France                     | France                                   |                                                         |                                                                                            |
| Marieke                           | Haalboom    |                       |                  | Medisch Spectrum Twente, Zutphen, Netherlands                                         | Netherlands                              |                                                         |                                                                                            |
| Daniel                            | Haber       |                       |                  | Rambam Hospital, Haifa, Israel                                                        | Israel                                   |                                                         |                                                                                            |
| Ali                               | Hachemi     |                       |                  | Centre Hospitalier de Soissons, Soissons, France                                      | France                                   |                                                         |                                                                                            |
| Nadir                             | Hadri       |                       |                  | Hôpital Kremlin-Bicêtre, Le Kremlin-Bicêtre, France                                   | France                                   |                                                         |                                                                                            |
| Sheeba                            | Hakak       |                       |                  | University Hospital - Waterford, Waterford, Ireland                                   | Ireland                                  |                                                         |                                                                                            |
| Adam                              | Hall        |                       |                  | Red Deer Regional Hospital, Red Deer, Canada                                          | Canada                                   |                                                         |                                                                                            |
| Matthew                           | Hall        |                       |                  | Big Data Institute, Nuffield Department of Medicine, University of Oxford, Oxford, UK | United Kingdom                           |                                                         |                                                                                            |
| Sophie                            | Halpin      |                       |                  | Oxford University (ISARIC4C), Oxford, United Kingdom                                  | United Kingdom                           |                                                         |                                                                                            |
| Ansley                            | Hamer       |                       |                  | McLeod Healthcare System, Florence, United States of America                          | United States of America                 |                                                         |                                                                                            |
| Raph L.                           | Hamers      |                       |                  | Murni Teguh Memorial Hospital and Bunda Thamrin Hospital, North Sumatera, Indonesia   | Indonesia                                |                                                         |                                                                                            |
| Rebecca                           | Hamidfar    |                       |                  | Centre Hospitalier Universitaire Grenoble-Alpes, Grenoble, France                     | France                                   |                                                         |                                                                                            |
| Bato                              | Hammarström |                       |                  | The Norwegian Corona Cohort, Oslo, Norway                                             | Norway                                   |                                                         |                                                                                            |
| Terese                            | Hammond     |                       |                  | Providence Saint John's Health Centre, Santa Monica, United States of America         | United States of America                 |                                                         |                                                                                            |
| Naomi                             | Hammond     |                       |                  | Monash University, Melbourne, Australia                                               | Australia                                |                                                         |                                                                                            |
| Lim Yuen                          | Han         |                       |                  | Kluang Hospital, Johor, Malaysia                                                      | Malaysia                                 |                                                         |                                                                                            |
| Rashan                            | Haniffa     |                       |                  | CCA Network                                                                           | Unknown                                  |                                                         |                                                                                            |
| Kok Wei                           | Hao         |                       |                  | Kluang Hospital, Johor, Malaysia                                                      | Malaysia                                 |                                                         |                                                                                            |
| Hayley                            | Hardwick    |                       |                  | Oxford University (ISARIC4C), Oxford, United Kingdom                                  | United Kingdom                           |                                                         |                                                                                            |

| *First Name and Middle Initial(s) | *Last Name         | *Suffix (eg, Jr, III) | Academic Degrees | Institution                                                                                 | Location (city, state/province, country) | Role or Contribution, eg, chair, principal investigator | Group (if more than 1 Group listed in the byline) and/or Subgroup (eg, Steering Committee) |
|-----------------------------------|--------------------|-----------------------|------------------|---------------------------------------------------------------------------------------------|------------------------------------------|---------------------------------------------------------|--------------------------------------------------------------------------------------------|
| Ewen M.                           | Harrison           |                       |                  | Centre for Medical Informatics, The Usher Institute, University of Edinburgh, Edinburgh, UK | United Kingdom                           |                                                         |                                                                                            |
| Janet                             | Harrison           |                       |                  | Oxford University (ISARIC4C), Oxford, United Kingdom                                        | United Kingdom                           |                                                         |                                                                                            |
| Samuel Bernard Ekow               | Harrison           |                       |                  | Kintampo Health Research Centre, Kintampo, Ghana                                            | Ghana                                    |                                                         |                                                                                            |
| Alan                              | Hartman            |                       |                  | Northwell Health, New York, United States of America                                        | United States of America                 |                                                         |                                                                                            |
| Junaid                            | Hashmi             |                       |                  | Our lady of Lourdes Drogheda, Drogheda, Ireland                                             | Ireland                                  |                                                         |                                                                                            |
| Ailbhe                            | Hayes              |                       |                  | Sligo University Hospital (Saoita), Sligo, Ireland                                          | Ireland                                  |                                                         |                                                                                            |
| Leanne                            | Hays               |                       |                  | St Vincents University Hospital, Dublin, Ireland                                            | Ireland                                  |                                                         |                                                                                            |
| Jan                               | Heerman            |                       |                  | AZ Maria Middelaes, Gent, Belgium                                                           | Belgium                                  |                                                         |                                                                                            |
| Lars                              | Heggelund          |                       |                  | Drammen Hospital, Drammen, Norway                                                           | Norway                                   |                                                         |                                                                                            |
| Ross                              | Hendry             |                       |                  | Oxford University (ISARIC4C), Oxford, United Kingdom                                        | United Kingdom                           |                                                         |                                                                                            |
| Martina                           | Hennessy           |                       |                  | St James's Hospital, Dublin, Ireland                                                        | Ireland                                  |                                                         |                                                                                            |
| Aquiles Rodrigo                   | Henriquez-Trujillo |                       |                  | Universidad de Las Américas, Quito, Ecuador                                                 | Ecuador                                  |                                                         |                                                                                            |
| Maxime                            | Hentzien           |                       |                  | Centre Hospitalier Universitaire de Reims, Reims, France                                    | France                                   |                                                         |                                                                                            |
| Diana                             | Hernandez          |                       |                  | Universidad del Cauca, Cauca, Colombia                                                      | Colombia                                 |                                                         |                                                                                            |
| Daniel                            | Herr               |                       |                  | University of Maryland, Baltimore, United States of America                                 | United States of America                 |                                                         |                                                                                            |
| Andrew                            | Hershey            |                       |                  | Lancaster General Health, Pennsylvania, United States of America                            | United States of America                 |                                                         |                                                                                            |
| Liv                               | Hesstvedt          |                       |                  | Oslo University Hospital, Oslo, Norway                                                      | Norway                                   |                                                         |                                                                                            |
| Astarini                          | Hidayah            |                       |                  | PICU Saiful Anwar Hospital, Malang, Indonesia                                               | Indonesia                                |                                                         |                                                                                            |
| Eibhlin                           | Higgins            |                       |                  | Galway University Hospital, Galway, Ireland                                                 | Ireland                                  |                                                         |                                                                                            |



| <b>*First Name and Middle Initial(s)</b> | <b>*Last Name</b> | <b>*Suffix (eg, Jr, III)</b> | <b>Academic Degrees</b> | <b>Institution</b>                                                                       | <b>Location (city, state/province, country)</b> | <b>Role or Contribution, eg, chair, principal investigator</b> | <b>Group (if more than 1 Group listed in the byline) and/or Subgroup (eg, Steering Committee)</b> |
|------------------------------------------|-------------------|------------------------------|-------------------------|------------------------------------------------------------------------------------------|-------------------------------------------------|----------------------------------------------------------------|---------------------------------------------------------------------------------------------------|
| Rupert                                   | Higgins           |                              |                         | ISARIC Global Support Centre, Oxford, United Kingdom                                     | United Kingdom                                  |                                                                |                                                                                                   |
| Samuel                                   | Hinton            |                              |                         | University of Queensland, Brisbane, Australia                                            | Australia                                       |                                                                |                                                                                                   |
| Hiroaki                                  | Hiraiwa           |                              |                         | Nagoya University Hospital, Nagoya, Japan                                                | Japan                                           |                                                                |                                                                                                   |
| Haider                                   | Hirkani           |                              |                         | Long COVID India - Terna Specialty Hospital and Research Centre, Mumbai, India           | India                                           |                                                                |                                                                                                   |
| Hikombo                                  | Hitoto            |                              |                         | Centre Hospitalier Le Mans, Le Mans, France                                              | France                                          |                                                                |                                                                                                   |
| Antonia                                  | Ho                |                              |                         | Medical Research Council-University of Glasgow Centre for Virus Research, Glasgow, UK    | United Kingdom                                  |                                                                |                                                                                                   |
| Yi Bin                                   | Ho                |                              |                         | Sultanah Bahiyah Hospital, Kedah, Malaysia                                               | Malaysia                                        |                                                                |                                                                                                   |
| Alexandre                                | Hoctin            |                              |                         | INSERM, Paris, France                                                                    | France                                          |                                                                |                                                                                                   |
| Isabelle                                 | Hoffmann          |                              |                         | INSERM, Paris, France                                                                    | France                                          |                                                                |                                                                                                   |
| Wei Han                                  | Hoh               |                              |                         | Tuanku Ja'afar, Negeri Sembilan, Malaysia                                                | Malaysia                                        |                                                                |                                                                                                   |
| Oscar                                    | Hoiting           |                              |                         | Canisius Wilhelmina Ziekenhuis, Nijmegen, Netherlands                                    | Netherlands                                     |                                                                |                                                                                                   |
| Rebecca                                  | Holt              |                              |                         | University of Alabama at Birmingham Hospital, Birmingham, United States of America       | United States of America                        |                                                                |                                                                                                   |
| Jan Cato                                 | Holter            |                              |                         | Oslo University Hospital, Oslo, Norway                                                   | Norway                                          |                                                                |                                                                                                   |
| Peter                                    | Horby             |                              |                         | ISARIC, Pandemic Sciences Institute, University of Oxford, Oxford, UK                    | United Kingdom                                  |                                                                |                                                                                                   |
| Juan Pablo                               | Horcajada         |                              |                         | Hospital del Mar, Barcelona, Spain                                                       | Spain                                           |                                                                |                                                                                                   |
| Ikram                                    | Houas             |                              |                         | INSERM, Paris, France                                                                    | France                                          |                                                                |                                                                                                   |
| Catherine L.                             | Hough             |                              |                         | US NHLBI PETAL Network, Boston, United States of America                                 | United States of America                        |                                                                |                                                                                                   |
| Stuart                                   | Houltham          |                              |                         | Cleveland Clinic, Ohio, Ohio, OH, United States of America                               | United States of America                        |                                                                |                                                                                                   |
| Jimmy Ming-Yang                          | Hsu               |                              |                         | McGill University Health Centre, Montreal, Canada                                        | Canada                                          |                                                                |                                                                                                   |
| Jean-Sébastien                           | Hulot             |                              |                         | INSERM, Paris, France                                                                    | France                                          |                                                                |                                                                                                   |
| Stella                                   | Huo               |                              |                         | University of California - San Francisco (UCSF), San Francisco, United States of America | United States of America                        |                                                                |                                                                                                   |

| *First Name and Middle Initial(s) | *Last Name        | *Suffix (eg, Jr, III) | Academic Degrees | Institution                                                                                                                | Location (city, state/province, country) | Role or Contribution, eg, chair, principal investigator | Group (if more than 1 Group listed in the byline) and/or Subgroup (eg, Steering Committee) |
|-----------------------------------|-------------------|-----------------------|------------------|----------------------------------------------------------------------------------------------------------------------------|------------------------------------------|---------------------------------------------------------|--------------------------------------------------------------------------------------------|
| Abby                              | Hurd              |                       |                  | St. Joseph's Healthcare Hamilton, Hamilton, Canada                                                                         | Canada                                   |                                                         |                                                                                            |
| Samreen                           | Ijaz              |                       |                  | Virology Reference Department, National Infection Service, Public Health England, Colindale Avenue, London, United Kingdom | United Kingdom                           |                                                         |                                                                                            |
| M. Arfan                          | Ikram             |                       |                  | Erasmus Medical Centre, Rotterdam, Netherlands                                                                             | Netherlands                              |                                                         |                                                                                            |
| Carlos Cañada                     | Illana            |                       |                  | La Paz Hospital, Madrid, Spain                                                                                             | Spain                                    |                                                         |                                                                                            |
| Patrick                           | Imbert            |                       |                  | Centre Hospitalier Annecy Genevois, Annecy, France                                                                         | France                                   |                                                         |                                                                                            |
| Hugo                              | Inácio            |                       |                  | Hospital Curry Cabral - Intensive Care Unit - UCIP7, Lisbon, Portugal                                                      | Portugal                                 |                                                         |                                                                                            |
| Carmen                            | Infante Dominguez |                       |                  | University Hospital Virgen del Rocío / Institute of Biomedicine of Seville, Seville, Spain                                 | Spain                                    |                                                         |                                                                                            |
| Yun Sii                           | Ing               |                       |                  | Sungai Buloh Hospital, Selangor, Malaysia                                                                                  | Malaysia                                 |                                                         |                                                                                            |
| Elias                             | Iosifidis         |                       |                  | Hippokration Hospital, Thessaloniki, Greece                                                                                | Greece                                   |                                                         |                                                                                            |
| Mariachiara                       | Ippolito          |                       |                  | University Hospital Policlinico Paolo Giaccone, Palermo, Italy                                                             | Italy                                    |                                                         |                                                                                            |
| Sarah                             | Isgett            |                       |                  | McLeod Healthcare System, Florence, United States of America                                                               | United States of America                 |                                                         |                                                                                            |
| Tiago                             | Isidoro           |                       |                  | Hospital Curry Cabral - Intensive Care Unit - UCIP7, Lisbon, Portugal                                                      | Portugal                                 |                                                         |                                                                                            |
| Nadiyah                           | Ismail            |                       |                  | Kuala Lumpur Hospital, WPKL, Malaysia                                                                                      | Malaysia                                 |                                                         |                                                                                            |
| Margaux                           | Isnard            |                       |                  | Centre Hospitalier Métropole Savoie, Chambéry, France                                                                      | France                                   |                                                         |                                                                                            |
| Mette Stausland                   | Istre             |                       |                  | The Norwegian Corona Cohort, Oslo, Norway                                                                                  | Norway                                   |                                                         |                                                                                            |
| Junji                             | Itai              |                       |                  | Hiroshima University, Hiroshima, Japan                                                                                     | Japan                                    |                                                         |                                                                                            |
| Daniel                            | Ivulich           |                       |                  | Hospital Aleman, Buenos Aires, Argentina                                                                                   | Argentina                                |                                                         |                                                                                            |
| Danielle                          | Jaafar            |                       |                  | Centre Hospitalier Intercommunal Villeneuve-Saint-Georges, Villeneuve-Saint-Georges, France                                | France                                   |                                                         |                                                                                            |
| Salma                             | Jaafoura          |                       |                  | INSERM, Paris, France                                                                                                      | France                                   |                                                         |                                                                                            |

| *First Name and Middle Initial(s) | *Last Name      | *Suffix (eg, Jr, III) | Academic Degrees | Institution                                                                    | Location (city, state/province, country) | Role or Contribution, eg, chair, principal investigator | Group (if more than 1 Group listed in the byline) and/or Subgroup (eg, Steering Committee) |
|-----------------------------------|-----------------|-----------------------|------------------|--------------------------------------------------------------------------------|------------------------------------------|---------------------------------------------------------|--------------------------------------------------------------------------------------------|
| Julien                            | Jabot           |                       |                  | Centre Hospitalier Félix-Guyon, Saint-Denis, Réunion                           | Réunion                                  |                                                         |                                                                                            |
| Clare                             | Jackson         |                       |                  | Oxford University (ISARIC4C), Oxford, United Kingdom                           | United Kingdom                           |                                                         |                                                                                            |
| Abubacarr                         | Jagne           |                       |                  | Clinical Services Department Fajara, Gambia                                    | Gambia                                   |                                                         |                                                                                            |
| Victoria                          | Janes           |                       |                  | PREPARE and RECOVER EU Consortium, Belgium                                     | Belgium                                  |                                                         |                                                                                            |
| Stéphane                          | Jaureguiberry   |                       |                  | Hôpital Kremlin-Bicêtre, Le Kremlin-Bicêtre, France                            | France                                   |                                                         |                                                                                            |
| Denise                            | Jaworsky        |                       |                  | Mills Memorial Hospital, Terrace, Canada                                       | Canada                                   |                                                         |                                                                                            |
| Florence                          | Jego            |                       |                  | Centre Hospitalier Métropole Savoie, Chambéry, France                          | France                                   |                                                         |                                                                                            |
| Anilawati Mat                     | Jelani          |                       |                  | Raja Perempuan Zainab II Hospital, Kelantan, Malaysia                          | Malaysia                                 |                                                         |                                                                                            |
| Synne                             | Jenum           |                       |                  | Oslo University Hospital, Oslo, Norway                                         | Norway                                   |                                                         |                                                                                            |
| Ruth                              | Jimbo-Sotomayor |                       |                  | Universidad de Las Américas, Quito, Ecuador                                    | Ecuador                                  |                                                         |                                                                                            |
| Ong Yiaw                          | Joe             |                       |                  | Kuala Lumpur Hospital, WPKL, Malaysia                                          | Malaysia                                 |                                                         |                                                                                            |
| Ruth Noemí                        | Jorge García    |                       |                  | Hospital Nuestra Señora de Gracia, Zaragoza, Spain                             | Spain                                    |                                                         |                                                                                            |
| Silje Bakken                      | Jørgensen       |                       |                  | The Norwegian Corona Cohort, Oslo, Norway                                      | Norway                                   |                                                         |                                                                                            |
| Mark                              | Joseph          |                       |                  | Carilion Clinic, Roanoke, United States of America                             | United States of America                 |                                                         |                                                                                            |
| Cédric                            | Joseph          |                       |                  | Centre Hospitalier Universitaire Amiens-Picardie, Amiens, France               | France                                   |                                                         |                                                                                            |
| Swosti                            | Joshi           |                       |                  | St Christopher's Hospital for Children, Philadelphia, United States of America | United States of America                 |                                                         |                                                                                            |
| Mercé                             | Jourdain        |                       |                  | Centre Hospitalier Universitaire de Lille, Lille, France                       | France                                   |                                                         |                                                                                            |
| Philippe                          | Jouvet          |                       |                  | The Centre hospitalier universitaire Sainte-Justine, Montreal, Canada          | Canada                                   |                                                         |                                                                                            |
| Anna                              | Jung            |                       |                  | Providence Saint John's Health Centre, Santa Monica, United States of America  | United States of America                 |                                                         |                                                                                            |

| *First Name and Middle Initial(s) | *Last Name | *Suffix (eg, Jr, III) | Academic Degrees | Institution                                                                                                                                                                    | Location (city, state/province, country) | Role or Contribution, eg, chair, principal investigator | Group (if more than 1 Group listed in the byline) and/or Subgroup (eg, Steering Committee) |
|-----------------------------------|------------|-----------------------|------------------|--------------------------------------------------------------------------------------------------------------------------------------------------------------------------------|------------------------------------------|---------------------------------------------------------|--------------------------------------------------------------------------------------------|
| Hanna                             | Jung       |                       |                  | Kyungpook National University Hospital, Daegu, South Korea                                                                                                                     | South Korea                              |                                                         |                                                                                            |
| Dafsah                            | Juzar      |                       |                  | National Cardiovascular Center Harapan Kita Jakarta Indonesia, Jakarta, Indonesia                                                                                              | Indonesia                                |                                                         |                                                                                            |
| Ouifiya                           | Kafif      |                       |                  | INSERM, Paris, France                                                                                                                                                          | France                                   |                                                         |                                                                                            |
| Florentia                         | Kaguelidou |                       |                  | INSERM, Paris, France                                                                                                                                                          | France                                   |                                                         |                                                                                            |
| Neerusha                          | Kaisbain   |                       |                  | Permai Hospital, Johor, Malaysia                                                                                                                                               | Malaysia                                 |                                                         |                                                                                            |
| Thavamany                         | Kaleesvran |                       |                  | Tuanku Fauziah Hospital, Perlis, Malaysia                                                                                                                                      | Malaysia                                 |                                                         |                                                                                            |
| Sabina                            | Kali       |                       |                  | INSERM, Paris, France                                                                                                                                                          | France                                   |                                                         |                                                                                            |
| Alina                             | Kalicinska |                       |                  | Consortium IMGEN, Piaseczno, Poland                                                                                                                                            | Poland                                   |                                                         |                                                                                            |
| Karl Trygve                       | Kalleberg  |                       |                  | The Norwegian Corona Cohort, Oslo, Norway                                                                                                                                      | Norway                                   |                                                         |                                                                                            |
| Smaragdi                          | Kalomoiri  |                       |                  | Sotiria General Hospital, Athens, Greece                                                                                                                                       | Greece                                   |                                                         |                                                                                            |
| Muhammad Aisar Ayadi              | Kamaluddin |                       |                  | Sungai Buloh Hospital, Selangor, Malaysia                                                                                                                                      | Malaysia                                 |                                                         |                                                                                            |
| Zul Amali Che                     | Kamaruddin |                       |                  | Tawau Hospital, Sabah, Malaysia                                                                                                                                                | Malaysia                                 |                                                         |                                                                                            |
| Nadiah                            | Kamarudin  |                       |                  | Melaka Hospital, Melaka, Malaysia                                                                                                                                              | Malaysia                                 |                                                         |                                                                                            |
| Darshana Hewa                     | Kandamby   |                       |                  | Princess Margaret Hospital, Kwai Hung, China                                                                                                                                   | China                                    |                                                         |                                                                                            |
| Kong Yeow                         | Kang       |                       |                  | Pulau Pinang Hospital, Pulau Pinang, Malaysia                                                                                                                                  | Malaysia                                 |                                                         |                                                                                            |
| Dyah                              | Kanyawati  |                       |                  | Sanglah General Hospital (Paediatric), Bali, Indonesia                                                                                                                         | Indonesia                                |                                                         |                                                                                            |
| Pratap                            | Karpayah   |                       |                  | Sungai Buloh Hospital, Selangor, Malaysia                                                                                                                                      | Malaysia                                 |                                                         |                                                                                            |
| Christiana                        | Kartsonaki |                       |                  | MRC Population Health Research Unit, Clinical Trials Service Unit and Epidemiological Studies Unit, Nuffield Department of Population Health, University of Oxford, Oxford, UK | United Kingdom                           |                                                         |                                                                                            |
| Daisuke                           | Kasugai    |                       |                  | Nagoya University Hospital, Nagoya, Japan                                                                                                                                      | Japan                                    |                                                         |                                                                                            |
| Kevin                             | Katz       |                       |                  | North York General Hospital, Toronto, Canada                                                                                                                                   | Canada                                   |                                                         |                                                                                            |
| Christy                           | Kay        |                       |                  | Washington University in St. Louis, St Louis, Missouri, United States of America                                                                                               | United States of America                 |                                                         |                                                                                            |
| Lamees                            | Kayyali    |                       |                  | Galway University Hospital, Galway, Ireland                                                                                                                                    | Ireland                                  |                                                         |                                                                                            |

| *First Name and Middle Initial(s) | *Last Name | *Suffix (eg, Jr, III) | Academic Degrees | Institution                                                                    | Location (city, state/province, country) | Role or Contribution, eg, chair, principal investigator | Group (if more than 1 Group listed in the byline) and/or Subgroup (eg, Steering Committee) |
|-----------------------------------|------------|-----------------------|------------------|--------------------------------------------------------------------------------|------------------------------------------|---------------------------------------------------------|--------------------------------------------------------------------------------------------|
| Seán                              | Keating    |                       |                  | Oxford University (ISARIC4C), Oxford, United Kingdom                           | United Kingdom                           |                                                         |                                                                                            |
| Pulak                             | Kedia      |                       |                  | Long COVID India - Terna Specialty Hospital and Research Centre, Mumbai, India | India                                    |                                                         |                                                                                            |
| Claire                            | Kelly      |                       |                  | Galway University Hospital, Galway, Ireland                                    | Ireland                                  |                                                         |                                                                                            |
| Yvelynne                          | Kelly      |                       |                  | Tallaght University Hospital, Dublin, Ireland                                  | Ireland                                  |                                                         |                                                                                            |
| Andrea                            | Kelly      |                       |                  | St James's Hospital, Dublin, Ireland                                           | Ireland                                  |                                                         |                                                                                            |
| Niamh                             | Kelly      |                       |                  | Cork University Hospital, Cork, Ireland                                        | Ireland                                  |                                                         |                                                                                            |
| Aoife                             | Kelly      |                       |                  | Mater Misericordiae University, Dublin, Ireland                                | Ireland                                  |                                                         |                                                                                            |
| Sadie                             | Kelly      |                       |                  | ISARIC Global Support Centre, Oxford, United Kingdom                           | United Kingdom                           |                                                         |                                                                                            |
| Maeve                             | Kelsey     |                       |                  | Cork University Hospital, Cork, Ireland                                        | Ireland                                  |                                                         |                                                                                            |
| Kalynn                            | Kenyon     |                       |                  | ISARIC Global Support Centre, Oxford, United Kingdom                           | United Kingdom                           |                                                         |                                                                                            |
| Sommay                            | Keomany    |                       |                  | Salavan Provincial Hospital, Salavan, Laos                                     | Laos                                     |                                                         |                                                                                            |
| Maeve                             | Kernan     |                       |                  | Galway University Hospital, Galway, Ireland                                    | Ireland                                  |                                                         |                                                                                            |
| Younes                            | Kerroumi   |                       |                  | Groupe Hospitalier Diaconesses Croix Saint-Simon, Paris, France                | France                                   |                                                         |                                                                                            |
| Sharma                            | Keshav     |                       |                  | Wexford General Hospital, Wexford, Ireland                                     | Ireland                                  |                                                         |                                                                                            |
| Imrana                            | Khalid     |                       |                  | Unity Health Toronto, Toronto, Canada                                          | Canada                                   |                                                         |                                                                                            |
| Antoine                           | Khalil     |                       |                  | INSERM, Paris, France                                                          | France                                   |                                                         |                                                                                            |
| Irfan                             | Khan       |                       |                  | Presbyterian Hospital Services, Albuquerque, United States of America          | United States of America                 |                                                         |                                                                                            |
| Krish                             | Kherajani  |                       |                  | Long COVID India - Terna Specialty Hospital and Research Centre, Mumbai, India | India                                    |                                                         |                                                                                            |
| Michelle E.                       | Kho        |                       |                  | McMaster University, Hamilton, Canada                                          | Canada                                   |                                                         |                                                                                            |
| Saye                              | Khoo       |                       |                  | Department of Pharmacology, University of Liverpool, Liverpool, UK             | United Kingdom                           |                                                         |                                                                                            |
| Ryan                              | Khoo       |                       |                  | Lahad Datu Hospital, Sabah, Malaysia                                           | Malaysia                                 |                                                         |                                                                                            |
| Denisa                            | Khoo       |                       |                  | Sungai Buloh Hospital, Selangor, Malaysia                                      | Malaysia                                 |                                                         |                                                                                            |
| Khor How                          | Kiat       |                       |                  | Kluang Hospital, Johor, Malaysia                                               | Malaysia                                 |                                                         |                                                                                            |

| *First Name and Middle Initial(s) | *Last Name        | *Suffix (eg, Jr, III) | Academic Degrees | Institution                                                                                             | Location (city, state/province, country) | Role or Contribution, eg, chair, principal investigator | Group (if more than 1 Group listed in the byline) and/or Subgroup (eg, Steering Committee) |
|-----------------------------------|-------------------|-----------------------|------------------|---------------------------------------------------------------------------------------------------------|------------------------------------------|---------------------------------------------------------|--------------------------------------------------------------------------------------------|
| Yuri                              | Kida              |                       |                  | University of Utah, Salt Lake City, United States of America                                            | United States of America                 |                                                         |                                                                                            |
| Peter                             | Kiiza             |                       |                  | Sunnybrook Health Sciences Centre, Toronto, Canada                                                      | Canada                                   |                                                         |                                                                                            |
| Beathe                            | Kiland Granerud   |                       |                  | Oslo University Hospital, Oslo, Norway                                                                  | Norway                                   |                                                         |                                                                                            |
| Anders Benjamin                   | Kildal            |                       |                  | University Hospital of North Norway, Tromso, Norway                                                     | Norway                                   |                                                         |                                                                                            |
| Jae Burm                          | Kim               |                       |                  | Keimyung University Dong San Hospital, Daegu, South Korea                                               | South Korea                              |                                                         |                                                                                            |
| Antoine                           | Kimoun            |                       |                  | Centre Hospitalier Régional et Universitaire de Nancy - Hôpitaux de Brabois, Nancy, France              | France                                   |                                                         |                                                                                            |
| Detlef                            | Kindgen-Milles    |                       |                  | University Hospital Dusseldorf, Dusseldorf, Germany                                                     | Germany                                  |                                                         |                                                                                            |
| Nobuya                            | Kitamura          |                       |                  | Kimitsu Chuo Hospital, Chiba, Japan                                                                     | Japan                                    |                                                         |                                                                                            |
| Eyrun Floerecke Kjetland          | Kjetland          |                       |                  | The Norwegian Corona Cohort, Oslo, Norway                                                               | Norway                                   |                                                         |                                                                                            |
| Paul                              | Klenerman         |                       |                  | Nuffield Department of Medicine, Peter Medawar Building for Pathogen Research, University of Oxford, UK | United Kingdom                           |                                                         |                                                                                            |
| Rob                               | Klont             |                       |                  | Medisch Spectrum Twente, Zutphen, Netherlands                                                           | Netherlands                              |                                                         |                                                                                            |
| Gry                               | Kloumann Bekken   |                       |                  | Drammen Hospital, Drammen, Norway                                                                       | Norway                                   |                                                         |                                                                                            |
| Stephen R                         | Knight            |                       |                  | Oxford University (ISARIC4C), Oxford, United Kingdom                                                    | United Kingdom                           |                                                         |                                                                                            |
| Robin                             | Kobbe             |                       |                  | University Children's Hospital, University Medical Center Hamburg-Eppendorf, Hamburg, Germany           | Germany                                  |                                                         |                                                                                            |
| Chamira                           | Kodippily         |                       |                  | CCA Network                                                                                             | Unknown                                  |                                                         |                                                                                            |
| Malte                             | Kohns Vasconcelos |                       |                  | University Hospital Dusseldorf, Dusseldorf, Germany                                                     | Germany                                  |                                                         |                                                                                            |

| *First Name and Middle Initial(s) | *Last Name   | *Suffix (eg, Jr, III) | Academic Degrees | Institution                                                                              | Location (city, state/province, country) | Role or Contribution, eg, chair, principal investigator | Group (if more than 1 Group listed in the byline) and/or Subgroup (eg, Steering Committee) |
|-----------------------------------|--------------|-----------------------|------------------|------------------------------------------------------------------------------------------|------------------------------------------|---------------------------------------------------------|--------------------------------------------------------------------------------------------|
| Mamoru                            | Komatsu      |                       |                  | Obihiro-Kosei General Hospital, Obihiro, Japan                                           | Japan                                    |                                                         |                                                                                            |
| Volkan                            | Korten       |                       |                  | Marmara University Hospital, Istanbul, Turkey                                            | Turkey                                   |                                                         |                                                                                            |
| Arsène                            | Kpangon      |                       |                  | Centre Hospitalier Andrée Rosemon, Cayenne, French Guiana                                | French Guiana                            |                                                         |                                                                                            |
| Karolina                          | Krawczyk     |                       |                  | St Vincents University Hospital, Dublin, Ireland                                         | Ireland                                  |                                                         |                                                                                            |
| Sudhir                            | Krishnan     |                       |                  | Cleveland Clinic, Ohio, OH, United States of America                                     | United States of America                 |                                                         |                                                                                            |
| Vinothini                         | Krishnan     |                       |                  | Sungai Buloh Hospital, Selangor, Malaysia                                                | Malaysia                                 |                                                         |                                                                                            |
| Oksana                            | Kruglova     |                       |                  | Lugansk State Medical University - Department of Internal Medicine No2, Lugansk, Ukraine | Ukraine                                  |                                                         |                                                                                            |
| Pei Xuan                          | Kuan         |                       |                  | Sungai Buloh Hospital, Selangor, Malaysia                                                | Malaysia                                 |                                                         |                                                                                            |
| Deepali                           | Kumar        |                       |                  | University Health Network, Toronto, Canada                                               | Canada                                   |                                                         |                                                                                            |
| Ganesh                            | Kumar        |                       |                  | Kuala Lumpur Hospital, WPKL, Malaysia                                                    | Malaysia                                 |                                                         |                                                                                            |
| Dinesh                            | Kuriakose    |                       |                  | Our lady of Lourdes Drogheda, Drogheda, Ireland                                          | Ireland                                  |                                                         |                                                                                            |
| Ethan                             | Kurtzman     |                       |                  | Hartford HealthCare, Hartford, United States of America                                  | United States of America                 |                                                         |                                                                                            |
| Neurinda Permata                  | Kusumastuti  |                       |                  | University Airlangga Hospital (Paediatric), Surabaya, Indonesia                          | Indonesia                                |                                                         |                                                                                            |
| Demetrios                         | Kutsogiannis |                       |                  | Royal Alexandra Hospital, Edmonton, Canada                                               | Canada                                   |                                                         |                                                                                            |
| Galyna                            | Kutsyna      |                       |                  | Lugansk State Medical University - Department of Internal Medicine No2, Lugansk, Ukraine | Ukraine                                  |                                                         |                                                                                            |
| Konstantinos                      | Kyriakoulis  |                       |                  | Sotiria General Hospital, Athens, Greece                                                 | Greece                                   |                                                         |                                                                                            |
| Marie                             | Lachatre     |                       |                  | Hôpital Cochin AP-HP, Paris, France                                                      | France                                   |                                                         |                                                                                            |
| Marie                             | Lacoste      |                       |                  | Centre Hospitalier Alpes-Leman, Contamine-sur-Arve, France                               | France                                   |                                                         |                                                                                            |
| John G.                           | Laffey       |                       |                  | Galway University Hospital, Galway, Ireland                                              | Ireland                                  |                                                         |                                                                                            |
| Nadhem                            | Lafhej       |                       |                  | Hôpital Bichat Claude-Bernard AP-HP, Paris, France                                       | France                                   |                                                         |                                                                                            |

| *First Name and Middle Initial(s) | *Last Name       | *Suffix (eg, Jr, III) | Academic Degrees | Institution                                                                    | Location (city, state/province, country) | Role or Contribution, eg, chair, principal investigator | Group (if more than 1 Group listed in the byline) and/or Subgroup (eg, Steering Committee) |
|-----------------------------------|------------------|-----------------------|------------------|--------------------------------------------------------------------------------|------------------------------------------|---------------------------------------------------------|--------------------------------------------------------------------------------------------|
| Marie                             | Lagrange         |                       |                  | Centre Hospitalier Félix-Guyon, Saint-Denis, Réunion                           | Réunion                                  |                                                         |                                                                                            |
| Fabrice                           | Laine            |                       |                  | Centre Hospitalier Universitaire Rennes (Hôpital Pontchaillou), Rennes, France | France                                   |                                                         |                                                                                            |
| Olivier                           | Lairez           |                       |                  | Centre Hospitalier Universitaire Toulouse (Rangueil), Toulouse, France         | France                                   |                                                         |                                                                                            |
| Antonio                           | Lalueza          |                       |                  | Hospital 12 de Octubre, Madrid, Spain                                          | Spain                                    |                                                         |                                                                                            |
| Marc                              | Lambert          |                       |                  | Hôpital Albert Calmette, Lille, France                                         | France                                   |                                                         |                                                                                            |
| Marie                             | Langelot-Richard |                       |                  | Centre Hospitalier Bretagne Atlantique, Vannes, France                         | France                                   |                                                         |                                                                                            |
| Vincent                           | Langlois         |                       |                  | Hôpital Jacques Monod, Le Havre, France                                        | France                                   |                                                         |                                                                                            |
| Eka Yudha                         | Lantang          |                       |                  | Prof Dr R. D. Kandou Central Hospital (Adult), Manado, Indonesia               | Indonesia                                |                                                         |                                                                                            |
| Marina                            | Lanza            |                       |                  | Instituto de Infectologia Emílio Ribas, Sao Paulo, Brazil                      | Brazil                                   |                                                         |                                                                                            |
| Cédric                            | Laouénan         |                       |                  | Université de Paris, France                                                    | France                                   |                                                         |                                                                                            |
| Samira                            | Laribi           |                       |                  | INSERM, Paris, France                                                          | France                                   |                                                         |                                                                                            |
| Delphine                          | Lariviere        |                       |                  | Centre Hospitalier Bretagne Atlantique, Vannes, France                         | France                                   |                                                         |                                                                                            |
| Stéphane                          | Lasry            |                       |                  | Hôpital Américain de Paris, Neuilly-sur-Seine, France                          | France                                   |                                                         |                                                                                            |
| Sakshi                            | Lath             |                       |                  | Long COVID India - Terna Specialty Hospital and Research Centre, Mumbai, India | India                                    |                                                         |                                                                                            |
| Odile                             | Launay           |                       |                  | Hôpital Cochin AP-HP, Paris, France                                            | France                                   |                                                         |                                                                                            |
| Didier                            | Laureillard      |                       |                  | Centre Hospitalier Universitaire de Nîmes, Nîmes, France                       | France                                   |                                                         |                                                                                            |
| Yoan                              | Lavie-Badie      |                       |                  | Centre Hospitalier Universitaire Toulouse (Rangueil), Toulouse, France         | France                                   |                                                         |                                                                                            |
| Andy                              | Law              |                       |                  | The Roslin Institute, University of Edinburgh, Edinburgh, UK                   | United Kingdom                           |                                                         |                                                                                            |
| Teresa                            | Lawrence         |                       |                  | University of Alberta Adult ICU, Edmonton, Canada                              | Canada                                   |                                                         |                                                                                            |



| *First Name and Middle Initial(s) | *Last Name  | *Suffix (eg, Jr, III) | Academic Degrees | Institution                                                          | Location (city, state/province, country) | Role or Contribution, eg, chair, principal investigator | Group (if more than 1 Group listed in the byline) and/or Subgroup (eg, Steering Committee) |
|-----------------------------------|-------------|-----------------------|------------------|----------------------------------------------------------------------|------------------------------------------|---------------------------------------------------------|--------------------------------------------------------------------------------------------|
| Cassie                            | Lawrence    |                       |                  | Wellington Regional Hospital, Wellington, New Zealand                | New Zealand                              |                                                         |                                                                                            |
| Minh                              | Le          |                       |                  | INSERM, Paris, France                                                | France                                   |                                                         |                                                                                            |
| Clément                           | Le Bihan    |                       |                  | Centre Hospitalier Universitaire de Montpellier, Montpellier, France | France                                   |                                                         |                                                                                            |
| Cyril                             | Le Bris     |                       |                  | Centre Hospitalier de Béziers, Béziers, France                       | France                                   |                                                         |                                                                                            |
| Georges                           | Le Falher   |                       |                  | Centre Hospitalier de Béziers, Béziers, France                       | France                                   |                                                         |                                                                                            |
| Lucie                             | Le Fevre    |                       |                  | Hôpital Bichat Claude-Bernard AP-HP, Paris, France                   | France                                   |                                                         |                                                                                            |
| Quentin                           | Le Hingrat  |                       |                  | INSERM, Paris, France                                                | France                                   |                                                         |                                                                                            |
| Marion                            | Le Maréchal |                       |                  | Centre Hospitalier Universitaire Grenoble-Alpes, Grenoble, France    | France                                   |                                                         |                                                                                            |
| Soizic                            | Le Mestre   |                       |                  | INSERM, Paris, France                                                | France                                   |                                                         |                                                                                            |
| Gwenaël                           | Le Moal     |                       |                  | Centre Hospitalier Universitaire de Poitiers, Poitiers, France       | France                                   |                                                         |                                                                                            |
| Vincent                           | Le Moing    |                       |                  | Centre Hospitalier Universitaire de Montpellier, Montpellier, France | France                                   |                                                         |                                                                                            |
| Hervé                             | Le Nagard   |                       |                  | INSERM, Paris, France                                                | France                                   |                                                         |                                                                                            |
| Ema                               | Leal        |                       |                  | Hospital de Curry Cabral - Infectious Diseases, Lisbon, Portugal     | Portugal                                 |                                                         |                                                                                            |
| Marta                             | Leal Santos |                       |                  | Hospital de Curry Cabral - Infectious Diseases, Lisbon, Portugal     | Portugal                                 |                                                         |                                                                                            |
| Todd C.                           | Lee         |                       |                  | McGill University Health Centre, Montreal, Canada                    | Canada                                   |                                                         |                                                                                            |
| Su Hwan                           | Lee         |                       |                  | Severance Hospital, Seoul, South Korea                               | South Korea                              |                                                         |                                                                                            |
| James                             | Lee         |                       |                  | ISARIC Global Support Centre, Oxford, United Kingdom                 | United Kingdom                           |                                                         |                                                                                            |
| Heng Gee                          | Lee         |                       |                  | Queen Elizabeth Hospital, Sabah, Malaysia                            | Malaysia                                 |                                                         |                                                                                            |
| Biing Horng                       | Lee         |                       |                  | Raja Permaisuri Bainun Hospital, Perak, Malaysia                     | Malaysia                                 |                                                         |                                                                                            |
| Yi Lin                            | Lee         |                       |                  | Sungai Buloh Hospital, Selangor, Malaysia                            | Malaysia                                 |                                                         |                                                                                            |
| Jennifer                          | Lee         |                       |                  | ISARIC Global Support Centre, Oxford, United Kingdom                 | United Kingdom                           |                                                         |                                                                                            |

| *First Name and Middle Initial(s) | *Last Name | *Suffix (eg, Jr, III) | Academic Degrees | Institution                                                                                       | Location (city, state/province, country) | Role or Contribution, eg, chair, principal investigator | Group (if more than 1 Group listed in the byline) and/or Subgroup (eg, Steering Committee) |
|-----------------------------------|------------|-----------------------|------------------|---------------------------------------------------------------------------------------------------|------------------------------------------|---------------------------------------------------------|--------------------------------------------------------------------------------------------|
| Gary                              | Leeming    |                       |                  | Oxford University (ISARIC4C), Oxford, United Kingdom                                              | United Kingdom                           |                                                         |                                                                                            |
| Laurent                           | Lefebvre   |                       |                  | Centre Hospitalier du Pays d'Aix, Aix-en-Provence, France                                         | France                                   |                                                         |                                                                                            |
| Bénédicte                         | Lefebvre   |                       |                  | Hôpital Saint-Antoine AP-HP, Paris, France                                                        | France                                   |                                                         |                                                                                            |
| Benjamin                          | Lefèvre    |                       |                  | Centre Hospitalier Régional et Universitaire de Nancy - Hôpitaux de Brabois, Nancy, France        | France                                   |                                                         |                                                                                            |
| Sylvie                            | LeGac      |                       |                  | Hôpital Bichat Claude-Bernard AP-HP, Paris, France                                                | France                                   |                                                         |                                                                                            |
| Jean-Daniel                       | Lelievre   |                       |                  | Hôpital Henri-Mondor, Créteil, France                                                             | France                                   |                                                         |                                                                                            |
| François                          | Lellouche  |                       |                  | University Institute of Cardiology and Respiriology, Quebec, Canada                               | Canada                                   |                                                         |                                                                                            |
| Adrien                            | Lemaigen   |                       |                  | Centre Hospitalier Régional et Universitaire de Tours, Tours, France                              | France                                   |                                                         |                                                                                            |
| Véronique                         | Lemee      |                       |                  | Centre Hospitalier Universitaire Rouen (Center Hospitalier Universitaire de Rouen), Rouen, France | France                                   |                                                         |                                                                                            |
| Anthony                           | Lemeur     |                       |                  | Centre Hospitalier de Cholet, Cholet, France                                                      | France                                   |                                                         |                                                                                            |
| Gretchen                          | Lemmink    |                       |                  | University of Cincinnati, Cincinnati, United States of America                                    | United States of America                 |                                                         |                                                                                            |
| Ha Sha                            | Lene       |                       |                  | Sultanah Nur Zahirah Hospital, Terengganu, Malaysia                                               | Malaysia                                 |                                                         |                                                                                            |
| Jenny                             | Lennon     |                       |                  | Children's Health Ireland, Dublin, Ireland                                                        | Ireland                                  |                                                         |                                                                                            |
| Rafael                            | León       |                       |                  | Reina Sofia University Hospital, Cordoba, Spain                                                   | Spain                                    |                                                         |                                                                                            |
| Marc                              | Leone      |                       |                  | Hôpital de la Timone, Marseille, France                                                           | France                                   |                                                         |                                                                                            |
| Quentin                           | Lepiller   |                       |                  | Centre Hospitalier Universitaire de Besançon, Besançon, France                                    | France                                   |                                                         |                                                                                            |
| François-Xavier                   | Lescure    |                       |                  | INSERM, Paris, France                                                                             | France                                   |                                                         |                                                                                            |
| Olivier                           | Lesens     |                       |                  | Centre Hospitalier Universitaire Gabriel Montpied, Clermont-Ferrand, France                       | France                                   |                                                         |                                                                                            |

| *First Name and Middle Initial(s) | *Last Name   | *Suffix (eg, Jr, III) | Academic Degrees | Institution                                                                                | Location (city, state/province, country) | Role or Contribution, eg, chair, principal investigator | Group (if more than 1 Group listed in the byline) and/or Subgroup (eg, Steering Committee) |
|-----------------------------------|--------------|-----------------------|------------------|--------------------------------------------------------------------------------------------|------------------------------------------|---------------------------------------------------------|--------------------------------------------------------------------------------------------|
| Mathieu                           | Lesouhaitier |                       |                  | Centre Hospitalier Universitaire Rennes (Hôpital Pontchaillou), Rennes, France             | France                                   |                                                         |                                                                                            |
| Amy                               | Lester-Grant |                       |                  | St Vincents University Hospital, Dublin, Ireland                                           | Ireland                                  |                                                         |                                                                                            |
| Andrew                            | Letizia      |                       |                  | Salavan Provincial Hospital, Salavan, Laos                                                 | Laos                                     |                                                         |                                                                                            |
| Sophie                            | Letrou       |                       |                  | Hôpital Bichat Claude-Bernard AP-HP, Paris, France                                         | France                                   |                                                         |                                                                                            |
| Yves                              | Levy         |                       |                  | INSERM, Paris, France                                                                      | France                                   |                                                         |                                                                                            |
| Bruno                             | Levy         |                       |                  | Centre Hospitalier Régional et Universitaire de Nancy - Hôpitaux de Brabois, Nancy, France | France                                   |                                                         |                                                                                            |
| Claire                            | Levy-Marchal |                       |                  | INSERM, Paris, France                                                                      | France                                   |                                                         |                                                                                            |
| Katarzyna                         | Lewandowska  |                       |                  | Institute of TB and Lung Diseases, Warsaw, Poland                                          | Poland                                   |                                                         |                                                                                            |
| Erwan                             | L'Her        |                       |                  | Centre Hospitalier Universitaire de Brest, Brest, France                                   | France                                   |                                                         |                                                                                            |
| Gianluigi                         | Li Bassi     |                       |                  | University of Queensland, Brisbane, Australia                                              | Australia                                |                                                         |                                                                                            |
| Janet                             | Liang        |                       |                  | Waitemata District Health Board, Auckland, New Zealand                                     | New Zealand                              |                                                         |                                                                                            |
| Geoffrey                          | Liegeon      |                       |                  | Hôpital Saint-Louis AP-HP, Paris, France                                                   | France                                   |                                                         |                                                                                            |
| Wei Shen                          | Lim          |                       |                  | Nottingham University Hospitals NHS Trust, Nottingham, United Kingdom                      | United Kingdom                           |                                                         |                                                                                            |
| Kah Chuan                         | Lim          |                       |                  | Sungai Buloh Hospital, Selangor, Malaysia                                                  | Malaysia                                 |                                                         |                                                                                            |
| Chantre                           | Lima         |                       |                  | Hospital Espírito Santo de Évora, Évora, Portugal                                          | Portugal                                 |                                                         |                                                                                            |
| Lim                               | Lina         |                       |                  | Melaka Hospital, Melaka, Malaysia                                                          | Malaysia                                 |                                                         |                                                                                            |
| Bruno                             | Lina         |                       |                  | INSERM, Paris, France                                                                      | France                                   |                                                         |                                                                                            |
| Andreas                           | Lind         |                       |                  | Oslo University Hospital, Oslo, Norway                                                     | Norway                                   |                                                         |                                                                                            |
| Maja Katherine                    | Lingad       |                       |                  | Angeles University Foundation Medical Center, Angeles, Philippines                         | The Philippines                          |                                                         |                                                                                            |
| Guillaume                         | Lingas       |                       |                  | INSERM, Paris, France                                                                      | France                                   |                                                         |                                                                                            |
| Sylvie                            | Lion-Daolio  |                       |                  | Centre Hospitalier Universitaire Amiens-Picardie, Amiens, France                           | France                                   |                                                         |                                                                                            |

| *First Name and Middle Initial(s) | *Last Name     | *Suffix (eg, Jr, III) | Academic Degrees | Institution                                                                            | Location (city, state/province, country) | Role or Contribution, eg, chair, principal investigator | Group (if more than 1 Group listed in the byline) and/or Subgroup (eg, Steering Committee) |
|-----------------------------------|----------------|-----------------------|------------------|----------------------------------------------------------------------------------------|------------------------------------------|---------------------------------------------------------|--------------------------------------------------------------------------------------------|
| Samantha                          | Lissauer       |                       |                  | Malawi-Liverpool Wellcome Trust, Blantyre, Malawi                                      | Malawi                                   |                                                         |                                                                                            |
| Keibun                            | Liu            |                       |                  | Saiseikai Utsunomiya Hospital, Tochigi, Japan                                          | Japan                                    |                                                         |                                                                                            |
| Marine                            | Livrozet       |                       |                  | Hôpital Européen Georges-Pompidou AP-HP, Paris, France                                 | France                                   |                                                         |                                                                                            |
| Patricia                          | Lizotte        |                       |                  | University Institute of Cardiology and Respirology, Quebec, Canada                     | Canada                                   |                                                         |                                                                                            |
| Antonio                           | Loforte        |                       |                  | Policlinicodi Orsola Universitàdi Bologna, Bologna, Italy                              | Italy                                    |                                                         |                                                                                            |
| Navy                              | Lolong         |                       |                  | Persahabatan Hospital, Jakarta, Indonesia                                              | Indonesia                                |                                                         |                                                                                            |
| Leong Chee                        | Loon           |                       |                  | Kuala Lumpur Hospital, WPKL, Malaysia                                                  | Malaysia                                 |                                                         |                                                                                            |
| Diogo                             | Lopes          |                       |                  | Hospital Curry Cabral - Intensive Care Unit - UCIP7, Lisbon, Portugal                  | Portugal                                 |                                                         |                                                                                            |
| Dalia                             | Lopez-Colon    |                       |                  | University of Florida, Gainesville, United States of America                           | United States of America                 |                                                         |                                                                                            |
| Jose W.                           | Lopez-Revilla  |                       |                  | Instituto Nacional del Niño San Borja, Lima, Peru                                      | Peru                                     |                                                         |                                                                                            |
| Anthony L.                        | Loschner       |                       |                  | Carilion Clinic, Roanoke, United States of America                                     | United States of America                 |                                                         |                                                                                            |
| Paul                              | Loubet         |                       |                  | Centre Hospitalier Universitaire de Nîmes, Nîmes, France                               | France                                   |                                                         |                                                                                            |
| Bouchra                           | Loufti         |                       |                  | Centre Hospitalier Mont-de-Marsan, Mont-de-Marsan, France                              | France                                   |                                                         |                                                                                            |
| Guillame                          | Louis          |                       |                  | Centre Hospitalier Régional Metz-Thionville, Metz, France                              | France                                   |                                                         |                                                                                            |
| Silvia                            | Lourenco       |                       |                  | Hospital Espírito Santo de Évora, Évora, Portugal                                      | Portugal                                 |                                                         |                                                                                            |
| Lara                              | Lovelace-Macon |                       |                  | University of Washington Medical Center - Northwest, Seattle, United States of America | United States of America                 |                                                         |                                                                                            |
| Lee Lee                           | Low            |                       |                  | Sultanah Bahiyah Hospital, Kedah, Malaysia                                             | Malaysia                                 |                                                         |                                                                                            |
| Marije                            | Lowik          |                       |                  | Medisch Spectrum Twente, Zutphen, Netherlands                                          | Netherlands                              |                                                         |                                                                                            |
| Jia Shyi                          | Loy            |                       |                  | Melaka Hospital, Melaka, Malaysia                                                      | Malaysia                                 |                                                         |                                                                                            |

| *First Name and Middle Initial(s) | *Last Name          | *Suffix (eg, Jr, III) | Academic Degrees | Institution                                                                                | Location (city, state/province, country) | Role or Contribution, eg, chair, principal investigator | Group (if more than 1 Group listed in the byline) and/or Subgroup (eg, Steering Committee) |
|-----------------------------------|---------------------|-----------------------|------------------|--------------------------------------------------------------------------------------------|------------------------------------------|---------------------------------------------------------|--------------------------------------------------------------------------------------------|
| Jean Christophe                   | Lucet               |                       |                  | INSERM, Paris, France                                                                      | France                                   |                                                         |                                                                                            |
| Carlos                            | Lumbreras Bermejo   |                       |                  | Hospital 12 de Octubre, Madrid, Spain                                                      | Spain                                    |                                                         |                                                                                            |
| Carlos M.                         | Luna                |                       |                  | Hospital de Clínicas, Buenos Aires, Argentina                                              | Argentina                                |                                                         |                                                                                            |
| Olguta                            | Lungu               |                       |                  | Grigore T Popa University of Medicine and Pharmacy, Bucharest, Romania                     | Romania                                  |                                                         |                                                                                            |
| Miles                             | Lunn                |                       |                  | ISARIC, Pandemic Sciences Institute, University of Oxford, Oxford, UK                      | United Kingdom                           |                                                         |                                                                                            |
| Liem                              | Luong               |                       |                  | Hôpital Cochin AP-HP, Paris, France                                                        | France                                   |                                                         |                                                                                            |
| Nestor                            | Luque               |                       |                  | Hospital Emergencia Ate Vitarte, Lima, Peru                                                | Peru                                     |                                                         |                                                                                            |
| Dominique                         | Luton               |                       |                  | Hôpital Bichat Claude-Bernard AP-HP, Paris, France                                         | France                                   |                                                         |                                                                                            |
| Olavi                             | Maasikas            |                       |                  | Tartu University Hospital, Tartu, Estonia                                                  | Estonia                                  |                                                         |                                                                                            |
| Sara                              | Machado             |                       |                  | Hospital Curry Cabral - Intensive Care Unit - UCIP7, Lisbon, Portugal                      | Portugal                                 |                                                         |                                                                                            |
| Moïse                             | Machado             |                       |                  | Grand Hôpital de l'Est Francilien (Site de Marne-la-Vallée), Jossigny, France              | France                                   |                                                         |                                                                                            |
| Gabriel                           | Macheda             |                       |                  | Centre Hospitalier Annecy Genevois, Annecy, France                                         | France                                   |                                                         |                                                                                            |
| Guillermo                         | Maestro de la Calle |                       |                  | Hospital 12 de Octubre, Madrid, Spain                                                      | Spain                                    |                                                         |                                                                                            |
| Rafael                            | Mahieu              |                       |                  | Centre Hospitalier Universitaire d'Angers, Angers, France                                  | France                                   |                                                         |                                                                                            |
| Sophie                            | Mahy                |                       |                  | Centre Hospitalier Universitaire Mitterrand Dijon-Bourgogne, Dijon, France                 | France                                   |                                                         |                                                                                            |
| Ana Raquel                        | Maia                |                       |                  | Hospital Professor Doutor Fernando Fonseca, Amadora, Portugal                              | Portugal                                 |                                                         |                                                                                            |
| Lars S.                           | Maier               |                       |                  | Klinik und Poliklinik für Innere Medizin II, University Hospital Regensburg, Kiel, Germany | Germany                                  |                                                         |                                                                                            |
| Mylène                            | Maillet             |                       |                  | Centre Hospitalier Annecy Genevois, Annecy, France                                         | France                                   |                                                         |                                                                                            |

| *First Name and Middle Initial(s) | *Last Name             | *Suffix (eg, Jr, III) | Academic Degrees | Institution                                                                                | Location (city, state/province, country) | Role or Contribution, eg, chair, principal investigator | Group (if more than 1 Group listed in the byline) and/or Subgroup (eg, Steering Committee) |
|-----------------------------------|------------------------|-----------------------|------------------|--------------------------------------------------------------------------------------------|------------------------------------------|---------------------------------------------------------|--------------------------------------------------------------------------------------------|
| Thomas                            | Maitre                 |                       |                  | Centre Hospitalier intercommunal de Créteil, Créteil, France                               | France                                   |                                                         |                                                                                            |
| Maximilian                        | Malferttheiner         |                       |                  | Klinik und Poliklinik für Innere Medizin II, University Hospital Regensburg, Kiel, Germany | Germany                                  |                                                         |                                                                                            |
| Nadia                             | Malik                  |                       |                  | William Osler Health Sciences System - Etobicoke General Hospital, Toronto, Canada         | Canada                                   |                                                         |                                                                                            |
| Paddy                             | Mallon                 |                       |                  | St Vincents University Hospital, Dublin, Ireland                                           | Ireland                                  |                                                         |                                                                                            |
| Fernando                          | Maltez                 |                       |                  | Hospital de Curry Cabral - Infectious Diseases, Lisbon, Portugal                           | Portugal                                 |                                                         |                                                                                            |
| Denis                             | Malvy                  |                       |                  | INSERM, Paris, France                                                                      | France                                   |                                                         |                                                                                            |
| Victoria                          | Manda                  |                       |                  | Hôpital Lariboisière AP-HP, Paris, France                                                  | France                                   |                                                         |                                                                                            |
| Jose M.                           | Mandei                 |                       |                  | Prof Dr R. D. Kandou Central Hospital (Paediatric), Manado, Indonesia                      | Indonesia                                |                                                         |                                                                                            |
| Laurent                           | Mandelbrot             |                       |                  | Hôpital Louis-Mourier, Colombes, France                                                    | France                                   |                                                         |                                                                                            |
| Frank                             | Manetta                |                       |                  | Northwell Health, New York, United States of America                                       | United States of America                 |                                                         |                                                                                            |
| Julie                             | Mankikian              |                       |                  | Centre Hospitalier Régional et Universitaire de Tours, Tours, France                       | France                                   |                                                         |                                                                                            |
| Edmund                            | Manning                |                       |                  | Cork University Hospital, Cork, Ireland                                                    | Ireland                                  |                                                         |                                                                                            |
| Aldric                            | Manuel                 |                       |                  | Centre Hospitalier Annecy Genevois, Annecy, France                                         | France                                   |                                                         |                                                                                            |
| Ceila                             | Maria Sant`Ana Malaque |                       |                  | Instituto de Infectologia Emílio Ribas, Sao Paulo, Brazil                                  | Brazil                                   |                                                         |                                                                                            |
| Flávio                            | Marino                 |                       |                  | Hospital Vila Franca de Xira, Lisbon, Portugal                                             | Portugal                                 |                                                         |                                                                                            |
| Samuel                            | Markowicz              |                       |                  | Centre Hospitalier Universitaire de Guadeloupe, Pointe-à-Pitre, Guadeloupe                 | Guadeloupe                               |                                                         |                                                                                            |
| Ana                               | Marques                |                       |                  | Centro Hospital e Universitário de Coimbra, Coimbra, Portugal                              | Portugal                                 |                                                         |                                                                                            |
| Catherine                         | Marquis                |                       |                  | Centre hospitalier Universitaire de Sherbrooke, Sherbrooke, Canada                         | Canada                                   |                                                         |                                                                                            |

| *First Name and Middle Initial(s) | *Last Name     | *Suffix (eg, Jr, III) | Academic Degrees | Institution                                                                                    | Location (city, state/province, country) | Role or Contribution, eg, chair, principal investigator | Group (if more than 1 Group listed in the byline) and/or Subgroup (eg, Steering Committee) |
|-----------------------------------|----------------|-----------------------|------------------|------------------------------------------------------------------------------------------------|------------------------------------------|---------------------------------------------------------|--------------------------------------------------------------------------------------------|
| Brian                             | Marsh          |                       |                  | Mater Misericordiae University, Dublin, Ireland                                                | Ireland                                  |                                                         |                                                                                            |
| Megan                             | Marshal        |                       |                  | Connolly Hospital Blanchardstown, Dublin, Ireland                                              | Ireland                                  |                                                         |                                                                                            |
| John                              | Marshall       |                       |                  | Unity Health Toronto, Toronto, Canada                                                          | Canada                                   |                                                         |                                                                                            |
| Celina Turchi                     | Martelli       |                       |                  | Centro de Pesquisa Aggeu Magalhães, Fiocruz, Recife, Brazil                                    | Brazil                                   |                                                         |                                                                                            |
| Dori-Ann                          | Martin         |                       |                  | Alberta Children's Hospital, Calgary, Canada                                                   | Canada                                   |                                                         |                                                                                            |
| Emily                             | Martin         |                       |                  | University of Michigan Schools of Medicine & Public Health, AnnArbor, United States of America | United States of America                 |                                                         |                                                                                            |
| Guillaume                         | Martin-Blondel |                       |                  | Hôpital Purpan, Toulouse, France                                                               | France                                   |                                                         |                                                                                            |
| F. Eduardo                        | Martinez       |                       |                  | Monash University, Melbourne, Australia                                                        | Australia                                |                                                         |                                                                                            |
| Martin                            | Martinot       |                       |                  | Centre Hospitalier de Colmar, Colmar, France                                                   | France                                   |                                                         |                                                                                            |
| Alejandro                         | Martín-Quiros  |                       |                  | Emergency Department. Hospital Universitario La Paz - IdiPAZ                                   | Spain                                    |                                                         |                                                                                            |
| João                              | Martins        |                       |                  | Centro Hospital e Universitário de Coimbra, Coimbra, Portugal                                  | Portugal                                 |                                                         |                                                                                            |
| Ana                               | Martins        |                       |                  | Hospital Curry Cabral - Intensive Care Unit - UCIP7, Lisbon, Portugal                          | Portugal                                 |                                                         |                                                                                            |
| Nuno                              | Martins        |                       |                  | Hospital Professor Doutor Fernando Fonseca, Amadora, Portugal                                  | Portugal                                 |                                                         |                                                                                            |
| Caroline                          | Martins Rego   |                       |                  | Instituto de Infectologia Emílio Ribas, Sao Paulo, Brazil                                      | Brazil                                   |                                                         |                                                                                            |
| Gennaro                           | Martucci       |                       |                  | Istituto Mediterraneo per i Trapianti e Terapie ad Alta Specializzazione, Palermo, Italy       | Italy                                    |                                                         |                                                                                            |
| Olga                              | Martynenko     |                       |                  | Lugansk State Medical University - Department of Internal Medicine No2, Lugansk, Ukraine       | Ukraine                                  |                                                         |                                                                                            |
| Eva Miranda                       | Marwali        |                       |                  | National Cardiovascular Center Harapan Kita Jakarta Indonesia, Jakarta, Indonesia              | Indonesia                                |                                                         |                                                                                            |
| Marsilla                          | Marzukie       |                       |                  | Tawau Hospital, Sabah, Malaysia                                                                | Malaysia                                 |                                                         |                                                                                            |

| *First Name and Middle Initial(s) | *Last Name       | *Suffix (eg, Jr, III) | Academic Degrees | Institution                                                                                | Location (city, state/province, country) | Role or Contribution, eg, chair, principal investigator | Group (if more than 1 Group listed in the byline) and/or Subgroup (eg, Steering Committee) |
|-----------------------------------|------------------|-----------------------|------------------|--------------------------------------------------------------------------------------------|------------------------------------------|---------------------------------------------------------|--------------------------------------------------------------------------------------------|
| David                             | Maslove          |                       |                  | Kingston Health Sciences Centre, Kingston, Canada                                          | Canada                                   |                                                         |                                                                                            |
| Sabina                            | Mason            |                       |                  | Tallaght University Hospital, Dublin, Ireland                                              | Ireland                                  |                                                         |                                                                                            |
| Moshe                             | Matan            |                       |                  | The Baruch Padeh Medical Center Poriya, Tiberias, Israel                                   | Israel                                   |                                                         |                                                                                            |
| Henrique                          | Mateus Fernandes |                       |                  | Hospital Sirio-Libanes, Sao Paulo, Brazil                                                  | Brazil                                   |                                                         |                                                                                            |
| Mathieu                           | Mattei           |                       |                  | Centre Hospitalier Régional et Universitaire de Nancy - Hôpitaux de Brabois, Nancy, France | France                                   |                                                         |                                                                                            |
| Laurence                          | Maulin           |                       |                  | Centre Hospitalier du Pays d'Aix, Aix-en-Provence, France                                  | France                                   |                                                         |                                                                                            |
| Javier                            | Maynar           |                       |                  | Hospital Universitario de Alava, Araba, Spain                                              | Spain                                    |                                                         |                                                                                            |
| Mayfong                           | Mayxay           |                       |                  | Salavan Provincial Hospital, Salavan, Laos                                                 | Laos                                     |                                                         |                                                                                            |
| Thierry                           | Mazzoni          |                       |                  | Centre Hospitalier de Cholet, Cholet, France                                               | France                                   |                                                         |                                                                                            |
| Lisa                              | Mc Sweeney       |                       |                  | Cork University Hospital, Cork, Ireland                                                    | Ireland                                  |                                                         |                                                                                            |
| Colin                             | McArthur         |                       |                  | Waikato Hospital, Hamilton, New Zealand                                                    | New Zealand                              |                                                         |                                                                                            |
| Naina                             | McCann           |                       |                  | Clinical Services Department Fajara, Gambia                                                | Gambia                                   |                                                         |                                                                                            |
| Peter                             | McCanny          |                       |                  | Monash University, Melbourne, Australia                                                    | Australia                                |                                                         |                                                                                            |
| Anne                              | McCarthy         |                       |                  | The Ottawa Hospital, Ottawa, Canada                                                        | Canada                                   |                                                         |                                                                                            |
| Aine                              | McCarthy         |                       |                  | Galway University Hospital, Galway, Ireland                                                | Ireland                                  |                                                         |                                                                                            |
| Colin                             | McCloskey        |                       |                  | UH Cleveland Hospital, Cleveland, United States of America                                 | United States of America                 |                                                         |                                                                                            |
| Rachael                           | McConnochie      |                       |                  | Auckland City Hospital (DCCM 82), Auckland, New Zealand                                    | New Zealand                              |                                                         |                                                                                            |
| Sherry                            | McDermott        |                       |                  | Lankenau Institute of Medical Research, Wynnewood, United States of America                | United States of America                 |                                                         |                                                                                            |
| Sarah E.                          | McDonald         |                       |                  | Oxford University (ISARIC4C), Oxford, United Kingdom                                       | United Kingdom                           |                                                         |                                                                                            |
| Aine                              | McElroy          |                       |                  | Mater Misericordiae University, Dublin, Ireland                                            | Ireland                                  |                                                         |                                                                                            |



| *First Name and Middle Initial(s) | *Last Name   | *Suffix (eg, Jr, III) | Academic Degrees | Institution                                                                                  | Location (city, state/province, country) | Role or Contribution, eg, chair, principal investigator | Group (if more than 1 Group listed in the byline) and/or Subgroup (eg, Steering Committee) |
|-----------------------------------|--------------|-----------------------|------------------|----------------------------------------------------------------------------------------------|------------------------------------------|---------------------------------------------------------|--------------------------------------------------------------------------------------------|
| Samuel                            | McElwee      |                       |                  | University of Alabama at Birmingham Hospital, Birmingham, United States of America           | United States of America                 |                                                         |                                                                                            |
| Natalie                           | McEvoy       |                       |                  | Beaumont Hospital, Dublin, Ireland                                                           | Ireland                                  |                                                         |                                                                                            |
| Allison                           | McGeer       |                       |                  | Mount Sinai Hospital, Toronto, Canada                                                        | Canada                                   |                                                         |                                                                                            |
| Kenneth A.                        | McLean       |                       |                  | Oxford University (ISARIC4C), Oxford, United Kingdom                                         | United Kingdom                           |                                                         |                                                                                            |
| Paul                              | McNally      |                       |                  | Children's Health Ireland, Dublin, Ireland                                                   | Ireland                                  |                                                         |                                                                                            |
| Bairbre                           | McNicholas   |                       |                  | Galway University Hospital, Galway, Ireland                                                  | Ireland                                  |                                                         |                                                                                            |
| Edel                              | Meaney       |                       |                  | St Vincents University Hospital, Dublin, Ireland                                             | Ireland                                  |                                                         |                                                                                            |
| Cécile                            | Mear-Passard |                       |                  | Centre Hospitalier Universitaire de Nantes (Hôpital femme-enfant-adolescent), Nantes, France | France                                   |                                                         |                                                                                            |
| Maggie                            | Mechlin      |                       |                  | University of Cincinnati, Cincinnati, United States of America                               | United States of America                 |                                                         |                                                                                            |
| Omar                              | Mehkri       |                       |                  | Cleveland Clinic, Ohio, Ohio, OH, United States of America                                   | United States of America                 |                                                         |                                                                                            |
| Ferruccio                         | Mele         |                       |                  | University of Campania, Carseta, Italy                                                       | Italy                                    |                                                         |                                                                                            |
| Luis                              | Melo         |                       |                  | Hospital Professor Doutor Fernando Fonseca, Amadora, Portugal                                | Portugal                                 |                                                         |                                                                                            |
| João João                         | Mendes       |                       |                  | Hospital Professor Doutor Fernando Fonseca, Amadora, Portugal                                | Portugal                                 |                                                         |                                                                                            |
| Ogechukwu                         | Menkiti      |                       |                  | St Christopher's Hospital for Children, Philadelphia, United States of America               | United States of America                 |                                                         |                                                                                            |
| Kusum                             | Menon        |                       |                  | Children's Hospital of Eastern Ontario, Ottawa, Canada                                       | Canada                                   |                                                         |                                                                                            |
| France                            | Mentré       |                       |                  | Université de Paris, France                                                                  | France                                   |                                                         |                                                                                            |
| Alexander J.                      | Mentzer      |                       |                  | Wellcome Centre for Human Genetics, University of Oxford, Oxford, UK                         | United Kingdom                           |                                                         |                                                                                            |
| Noémie                            | Mercier      |                       |                  | INSERM, Paris, France                                                                        | France                                   |                                                         |                                                                                            |
| Emmanuelle                        | Mercier      |                       |                  | Centre Hospitalier Régional et Universitaire de Tours, Tours, France                         | France                                   |                                                         |                                                                                            |

| *First Name and Middle Initial(s) | *Last Name        | *Suffix (eg, Jr, III) | Academic Degrees | Institution                                                                                                       | Location (city, state/province, country) | Role or Contribution, eg, chair, principal investigator | Group (if more than 1 Group listed in the byline) and/or Subgroup (eg, Steering Committee) |
|-----------------------------------|-------------------|-----------------------|------------------|-------------------------------------------------------------------------------------------------------------------|------------------------------------------|---------------------------------------------------------|--------------------------------------------------------------------------------------------|
| Antoine                           | Merckx            |                       |                  | Centre Hospitalier de Cahors, Cahors, France                                                                      | France                                   |                                                         |                                                                                            |
| Mayka                             | Mergeay-Fabre     |                       |                  | Centre Hospitalier Andrée Rosemon, Cayenne, French Guiana                                                         | French Guiana                            |                                                         |                                                                                            |
| Blake                             | Mergler           |                       |                  | Perelman School of Medicine at the University of Pennsylvania, Philadelphia, United States of America             | United States of America                 |                                                         |                                                                                            |
| António                           | Mesquita          |                       |                  | Hospital Curry Cabral - Intensive Care Unit - UCIP7, Lisbon, Portugal                                             | Portugal                                 |                                                         |                                                                                            |
| Roberta                           | Meta              |                       |                  | St Bernard's Hospital, Gibraltar, Gibraltar                                                                       | Gibraltar                                |                                                         |                                                                                            |
| Osama                             | Metwally          |                       |                  | Galway University Hospital, Galway, Ireland                                                                       | Ireland                                  |                                                         |                                                                                            |
| Agnès                             | Meybeck           |                       |                  | Centre Hospitalier de Tourcoing, Tourcoing, France                                                                | France                                   |                                                         |                                                                                            |
| Dan                               | Meyer             |                       |                  | Baylor Scott & White Health, Temple, United States of America                                                     | United States of America                 |                                                         |                                                                                            |
| Alison M.                         | Meynert           |                       |                  | MRC Human Genetics Unit, MRC Institute of Genetics and Molecular Medicine, University of Edinburgh, Edinburgh, UK | United Kingdom                           |                                                         |                                                                                            |
| Vanina                            | Meysonnier        |                       |                  | Groupe Hospitalier Diaconesses Croix Saint-Simon, Paris, France                                                   | France                                   |                                                         |                                                                                            |
| Mehdi                             | Mezidi            |                       |                  | Hôpital Lyon Sud - HCL, Lyon, France                                                                              | France                                   |                                                         |                                                                                            |
| Céline                            | Michelanglei      |                       |                  | Centre Hospitalier Universitaire de Nice (Hôpital Archet), Nice, France                                           | France                                   |                                                         |                                                                                            |
| Isabelle                          | Michelet          |                       |                  | Centre Hospitalier Universitaire Rouen (Hôpital Charles Nicolle), Rouen, France                                   | France                                   |                                                         |                                                                                            |
| Efstathia                         | Mihelis           |                       |                  | Northwell Health, New York, United States of America                                                              | United States of America                 |                                                         |                                                                                            |
| Vladislav                         | Mihnovit          |                       |                  | Tartu University Hospital, Tartu, Estonia                                                                         | Estonia                                  |                                                         |                                                                                            |
| Jennene                           | Miller            |                       |                  | Monash University, Melbourne, Australia                                                                           | Australia                                |                                                         |                                                                                            |
| Hugo                              | Miranda-Maldonado |                       |                  | Universidad de Las Américas, Quito, Ecuador                                                                       | Ecuador                                  |                                                         |                                                                                            |
| Nor Arisah                        | Misnan            |                       |                  | Sungai Buloh Hospital, Selangor, Malaysia                                                                         | Malaysia                                 |                                                         |                                                                                            |
| Tahira Jamal                      | Mohamed           |                       |                  | Kuala Lumpur Hospital, WPKL, Malaysia                                                                             | Malaysia                                 |                                                         |                                                                                            |
| Nik Nur Eliza                     | Mohamed           |                       |                  | Kuala Lumpur Hospital, WPKL, Malaysia                                                                             | Malaysia                                 |                                                         |                                                                                            |

| *First Name and Middle Initial(s) | *Last Name    | *Suffix (eg, Jr, III) | Academic Degrees | Institution                                                                                        | Location (city, state/province, country) | Role or Contribution, eg, chair, principal investigator | Group (if more than 1 Group listed in the byline) and/or Subgroup (eg, Steering Committee) |
|-----------------------------------|---------------|-----------------------|------------------|----------------------------------------------------------------------------------------------------|------------------------------------------|---------------------------------------------------------|--------------------------------------------------------------------------------------------|
| Asma                              | Moin          |                       |                  | William Osler Health Sciences System - Etobicoke General Hospital, Toronto, Canada                 | Canada                                   |                                                         |                                                                                            |
| Elena                             | Molinos       |                       |                  | Comissão de Ética - Unidade Local de Saúde de Matosinhos, Porto, Portugal                          | Portugal                                 |                                                         |                                                                                            |
| Brenda                            | Molloy        |                       |                  | St Vincents University Hospital, Dublin, Ireland                                                   | Ireland                                  |                                                         |                                                                                            |
| Mary                              | Mone          |                       |                  | University of Utah, Salt Lake City, United States of America                                       | United States of America                 |                                                         |                                                                                            |
| Agostinho                         | Monteiro      |                       |                  | Hospital Curry Cabral - Intensive Care Unit - UCIP7, Lisbon, Portugal                              | Portugal                                 |                                                         |                                                                                            |
| Claudia                           | Montes        |                       |                  | Clinica Valle de Lilli, Valle del Cauca, Colombia                                                  | Colombia                                 |                                                         |                                                                                            |
| Giorgia                           | Montrucchio   |                       |                  | Ospedale Molinette, Torino, Italy                                                                  | Italy                                    |                                                         |                                                                                            |
| Shona C.                          | Moore         |                       |                  | Institute of Infection, Veterinary and Ecological Sciences, University of Liverpool, Liverpool, UK | United Kingdom                           |                                                         |                                                                                            |
| Sarah                             | Moore         |                       |                  | ISARIC Global Support Centre, Oxford, United Kingdom                                               | United Kingdom                           |                                                         |                                                                                            |
| Lina                              | Morales Cely  |                       |                  | Clinica Universidad de La Sabana, Chia, Colombia                                                   | Colombia                                 |                                                         |                                                                                            |
| Lucia                             | Moro          |                       |                  | Ospedale Sacro Cuore Don Calabria, Negrar Di Valpolicella, Italy                                   | Italy                                    |                                                         |                                                                                            |
| Ben                               | Morton        |                       |                  | Liverpool School of Tropical Medicine, Liverpool, UK                                               | Malawi                                   |                                                         |                                                                                            |
| Catherine                         | Motherway     |                       |                  | University Hospital - Limerick, Limerick, Ireland                                                  | Ireland                                  |                                                         |                                                                                            |
| Ana                               | Motos         |                       |                  | Hospital Clinic, Barcelona, Spain                                                                  | Spain                                    |                                                         |                                                                                            |
| Hugo                              | Mouquet       |                       |                  | INSERM, Paris, France                                                                              | France                                   |                                                         |                                                                                            |
| Clara                             | Mouton Perrot |                       |                  | Centre Hospitalier Henri Duffaut, Avignon, France                                                  | France                                   |                                                         |                                                                                            |
| Julien                            | Moyet         |                       |                  | Centre Hospitalier Universitaire Amiens-Picardie, Amiens, France                                   | France                                   |                                                         |                                                                                            |
| Caroline                          | Mudara        |                       |                  | National Institute for Communicable Diseases, Johannesburg, South Africa                           | South Africa                             |                                                         |                                                                                            |

| *First Name and Middle Initial(s) | *Last Name        | *Suffix (eg, Jr, III) | Academic Degrees | Institution                                                                                                                                                   | Location (city, state/province, country) | Role or Contribution, eg, chair, principal investigator | Group (if more than 1 Group listed in the byline) and/or Subgroup (eg, Steering Committee) |
|-----------------------------------|-------------------|-----------------------|------------------|---------------------------------------------------------------------------------------------------------------------------------------------------------------|------------------------------------------|---------------------------------------------------------|--------------------------------------------------------------------------------------------|
| Ng Yong                           | Muh               |                       |                  | Kuala Lumpur Hospital, WPKL, Malaysia                                                                                                                         | Malaysia                                 |                                                         |                                                                                            |
| Dzawani                           | Muhamad           |                       |                  | Tengku Ampuan Afzan Hospital, Pahang, Malaysia                                                                                                                | Malaysia                                 |                                                         |                                                                                            |
| Jimmy                             | Mullaert          |                       |                  | INSERM, Paris, France                                                                                                                                         | France                                   |                                                         |                                                                                            |
| Fredrik                           | Müller            |                       |                  | Oslo University Hospital, Oslo, Norway                                                                                                                        | Norway                                   |                                                         |                                                                                            |
| Karl Erik                         | Müller            |                       |                  | Drammen Hospital, Drammen, Norway                                                                                                                             | Norway                                   |                                                         |                                                                                            |
| Daniel                            | Munblit           |                       |                  | Care for Long Term Conditions Division, Florence Nightingale Faculty of Nursing, Midwifery and Palliative Care, King's College London, London, United Kingdom | Russia                                   |                                                         |                                                                                            |
| Laveena                           | Munshi            |                       |                  | Sinai Health Systems, Toronto, Canada                                                                                                                         | Canada                                   |                                                         |                                                                                            |
| Aisling                           | Murphy            |                       |                  | University Hospital - Waterford, Waterford, Ireland                                                                                                           | Ireland                                  |                                                         |                                                                                            |
| Patrick                           | Murray            |                       |                  | St Vincents University Hospital, Dublin, Ireland                                                                                                              | Ireland                                  |                                                         |                                                                                            |
| Marlène                           | Murris            |                       |                  | Centre Hospitalier Universitaire Toulouse (Larrey), Toulouse, France                                                                                          | France                                   |                                                         |                                                                                            |
| Srinivas                          | Murthy            |                       |                  | Faculty of Medicine, University of British Columbia, Vancouver, Canada                                                                                        | United Kingdom                           |                                                         |                                                                                            |
| Himed                             | Musaab            |                       |                  | Wexford General Hospital, Wexford, Ireland                                                                                                                    | Ireland                                  |                                                         |                                                                                            |
| Himasha                           | Muvindi           |                       |                  | CCA Network                                                                                                                                                   | Unknown                                  |                                                         |                                                                                            |
| Dimitra Melia                     | Myrodia           |                       |                  | Sotiria General Hospital, Athens, Greece                                                                                                                      | Greece                                   |                                                         |                                                                                            |
| Behzad                            | Nadjm             |                       |                  | Clinical Services Department Fajara, Gambia                                                                                                                   | Gambia                                   |                                                         |                                                                                            |
| Dave                              | Nagpal            |                       |                  | London Health Sciences Centre, London, Canada                                                                                                                 | Canada                                   |                                                         |                                                                                            |
| Alex                              | Nagrebetsky       |                       |                  | Baystate MC, Springfield, United States of America                                                                                                            | United States of America                 |                                                         |                                                                                            |
| Mangala                           | Narasimhan        |                       |                  | Northwell Health, New York, United States of America                                                                                                          | United States of America                 |                                                         |                                                                                            |
| Nageswaran                        | Narayanan         |                       |                  | Our lady of Lourdes Drogheda, Drogheda, Ireland                                                                                                               | Ireland                                  |                                                         |                                                                                            |
| Alasdair                          | Nazerali-Maitland |                       |                  | University Hospital Northern British Columbia, Prince George, Canada                                                                                          | Canada                                   |                                                         |                                                                                            |

| *First Name and Middle Initial(s) | *Last Name      | *Suffix (eg, Jr, III) | Academic Degrees | Institution                                                                            | Location (city, state/province, country) | Role or Contribution, eg, chair, principal investigator | Group (if more than 1 Group listed in the byline) and/or Subgroup (eg, Steering Committee) |
|-----------------------------------|-----------------|-----------------------|------------------|----------------------------------------------------------------------------------------|------------------------------------------|---------------------------------------------------------|--------------------------------------------------------------------------------------------|
| Nadège                            | Neant           |                       |                  | INSERM, Paris, France                                                                  | France                                   |                                                         |                                                                                            |
| Holger                            | Neb             |                       |                  | Uniklinik University Hospital, Frankfurt, Germany                                      | Germany                                  |                                                         |                                                                                            |
| Nikita                            | Nekliudov       |                       |                  | Sechenov University, Moscow, Russia                                                    | Russia                                   |                                                         |                                                                                            |
| Matthew                           | Nelder          |                       |                  | Memorial University, St. John's, Newfoundland, St John's, Canada                       | Canada                                   |                                                         |                                                                                            |
| Erni                              | Nelwan          |                       |                  | Pratama Rada Bolo Hospital, Karitas Hospital and Waikabubak Hospital, Sumba, Indonesia | Indonesia                                |                                                         |                                                                                            |
| Raul                              | Neto            |                       |                  | Centro Hospitalar Vila Nova de Gaia/Espinho, Espinho, Portugal                         | Portugal                                 |                                                         |                                                                                            |
| Emily                             | Neumann         |                       |                  | Medical College of Wisconsin, Wisconsin, United States of America                      | United States of America                 |                                                         |                                                                                            |
| Pauline Yeung                     | Ng              |                       |                  | Queen Mary Hospital, Pok Fu Lam, China                                                 | China                                    |                                                         |                                                                                            |
| Wing Yiu                          | Ng              |                       |                  | Queen Elizabeth Hospital, Yau Ma Tei, China                                            | China                                    |                                                         |                                                                                            |
| Anthony                           | Nghi            |                       |                  | Centre Hospitalier Techer, Calais, France                                              | France                                   |                                                         |                                                                                            |
| Duc                               | Nguyen          |                       |                  | Hôpital Pellegrin, Bordeaux, France                                                    | France                                   |                                                         |                                                                                            |
| Orna                              | Ni Choileain    |                       |                  | Beaumont Hospital, Dublin, Ireland                                                     | Ireland                                  |                                                         |                                                                                            |
| Niamh                             | Ni Leathlobhair |                       |                  | Galway University Hospital, Galway, Ireland                                            | Ireland                                  |                                                         |                                                                                            |
| Alistair D                        | Nichol          |                       |                  | Irish Critical Care Critical Clinical Trials Network, Dublin, Ireland, UK              | Ireland                                  |                                                         |                                                                                            |
| Prompak                           | Nitayavardhana  |                       |                  | Siriraj Piyamaharajkarun Hospital (SiPH), Bangkok, Thailand                            | Thailand                                 |                                                         |                                                                                            |
| Stephanie                         | Nonas           |                       |                  | Oregon Health & Science University, Portland, United States of America                 | United States of America                 |                                                         |                                                                                            |
| Nurul Amani Mohd                  | Noordin         |                       |                  | Melaka Hospital, Melaka, Malaysia                                                      | Malaysia                                 |                                                         |                                                                                            |
| Nurul Faten Izzati                | Norharizam      |                       |                  | Sungai Buloh Hospital, Selangor, Malaysia                                              | Malaysia                                 |                                                         |                                                                                            |
| Alessandra                        | Notari          |                       |                  | Hospital Escola da Universidade Federal de Pelotas, Pelotas, Brazil                    | Brazil                                   |                                                         |                                                                                            |
| Mahdad                            | Noursadeghi     |                       |                  | Division of Infection and Immunity, University College London, UK                      | United Kingdom                           |                                                         |                                                                                            |
| Adam                              | Nowinski        |                       |                  | Institute of TB and Lung Diseases, Warsaw, Poland                                      | Poland                                   |                                                         |                                                                                            |

| *First Name and Middle Initial(s) | *Last Name   | *Suffix (eg, Jr, III) | Academic Degrees | Institution                                                                                                       | Location (city, state/province, country) | Role or Contribution, eg, chair, principal investigator | Group (if more than 1 Group listed in the byline) and/or Subgroup (eg, Steering Committee) |
|-----------------------------------|--------------|-----------------------|------------------|-------------------------------------------------------------------------------------------------------------------|------------------------------------------|---------------------------------------------------------|--------------------------------------------------------------------------------------------|
| Saad                              | Nseir        |                       |                  | Centre Hospitalier Universitaire de Lille, Lille, France                                                          | France                                   |                                                         |                                                                                            |
| Nurnaningsih                      | Nurnaningsih |                       |                  | Dr Sardjito Government Hospital (Paediatric), Yogyakarta, Indonesia                                               | Indonesia                                |                                                         |                                                                                            |
| Dwi Utomo                         | Nusantara    |                       |                  | RSUD Pasar Minggu, South Jakarta, Indonesia                                                                       | Indonesia                                |                                                         |                                                                                            |
| Elsa                              | Nyamankolly  |                       |                  | Centre Hospitalier de Dax - Côte d'Argent, Dax, France                                                            | France                                   |                                                         |                                                                                            |
| Anders Benteson                   | Nygaard      |                       |                  | The Norwegian Corona Cohort, Oslo, Norway                                                                         | Norway                                   |                                                         |                                                                                            |
| Fionnuala                         | O'Brien      |                       |                  | Cork University Hospital, Cork, Ireland                                                                           | Ireland                                  |                                                         |                                                                                            |
| Annamarie                         | O'Callaghan  |                       |                  | Cork University Hospital, Cork, Ireland                                                                           | Ireland                                  |                                                         |                                                                                            |
| Giovanna                          | Occhipinti   |                       |                  | Istituto Mediterraneo per i Trapianti e Terapie ad Alta Specializzazione, Palermo, Italy                          | Italy                                    |                                                         |                                                                                            |
| Derbrenn                          | O'Connor     |                       |                  | Bon Secours Hospital, Cork, Ireland                                                                               | Ireland                                  |                                                         |                                                                                            |
| Max                               | O'Donnell    |                       |                  | Columbia University, New York, United States of America                                                           | United States of America                 |                                                         |                                                                                            |
| Tawnya                            | Ogston       |                       |                  | Legacy Emanuel Medical Center, Portland, United States of America                                                 | United States of America                 |                                                         |                                                                                            |
| Takayuki                          | Ogura        |                       |                  | Saiseikai Utsunomiya Hospital, Tochigi, Japan                                                                     | Japan                                    |                                                         |                                                                                            |
| Tak-Hyuk                          | Oh           |                       |                  | Kyung Pook National University Chilgok Hospital, Daegu, South Korea                                               | South Korea                              |                                                         |                                                                                            |
| Sophie                            | O'Halloran   |                       |                  | Connolly Hospital Blanchardstown, Dublin, Ireland                                                                 | Ireland                                  |                                                         |                                                                                            |
| Katie                             | O'Hearn      |                       |                  | Children's Hospital of Eastern Ontario, Ottawa, Canada                                                            | Canada                                   |                                                         |                                                                                            |
| Agnieszka                         | Oldakowska   |                       |                  | Department of Children's Infectious Diseases, Warsaw, Poland                                                      | Poland                                   |                                                         |                                                                                            |
| João                              | Oliveira     |                       |                  | Hospital de São José -U.U.M., Lisbon, Portugal                                                                    | Portugal                                 |                                                         |                                                                                            |
| Piero L.                          | Olliaro      |                       |                  | ISARIC, Pandemic Sciences Institute, University of Oxford, Oxford, UK                                             | United Kingdom                           |                                                         |                                                                                            |
| David S. Y.                       | Ong          |                       |                  | Department of Medical Microbiology and Infection Control, Franciscus Gasthuis & Vlietland, Rotterdam, Netherlands | Netherlands                              |                                                         |                                                                                            |

| *First Name and Middle Initial(s) | *Last Name      | *Suffix (eg, Jr, III) | Academic Degrees | Institution                                                                              | Location (city, state/province, country) | Role or Contribution, eg, chair, principal investigator | Group (if more than 1 Group listed in the byline) and/or Subgroup (eg, Steering Committee) |
|-----------------------------------|-----------------|-----------------------|------------------|------------------------------------------------------------------------------------------|------------------------------------------|---------------------------------------------------------|--------------------------------------------------------------------------------------------|
| Jee Yan                           | Ong             |                       |                  | Sarawak General Hospital, Sarawak, Malaysia                                              | Malaysia                                 |                                                         |                                                                                            |
| Wilna                             | Oosthuyzen      |                       |                  | Oxford University (ISARIC4C), Oxford, United Kingdom                                     | United Kingdom                           |                                                         |                                                                                            |
| Anne                              | Opavsky         |                       |                  | Joseph Brant Hospital, Burlington, Canada                                                | Canada                                   |                                                         |                                                                                            |
| Peter                             | Openshaw        |                       |                  | National Heart and Lung Institute, Imperial College London, London, UK                   | United Kingdom                           |                                                         |                                                                                            |
| Claudia Milena                    | Orozco-Chamorro |                       |                  | Universidad del Cauca, Cauca, Colombia                                                   | Colombia                                 |                                                         |                                                                                            |
| Jamel                             | Ortoleva        |                       |                  | Tufts Medical Centre, Boston, United States of America                                   | United States of America                 |                                                         |                                                                                            |
| Javier                            | Osatnik         |                       |                  | Hospital Aleman, Buenos Aires, Argentina                                                 | Argentina                                |                                                         |                                                                                            |
| Linda                             | O'Shea          |                       |                  | Wexford General Hospital, Wexford, Ireland                                               | Ireland                                  |                                                         |                                                                                            |
| Miriam                            | O'Sullivan      |                       |                  | Sligo University Hospital (Saoita), Sligo, Ireland                                       | Ireland                                  |                                                         |                                                                                            |
| Siti Zubaidah                     | Othman          |                       |                  | Kuala Lumpur Hospital, WPKL, Malaysia                                                    | Malaysia                                 |                                                         |                                                                                            |
| Paul                              | Otiku           |                       |                  | Bar-Ilan University, Ramat Gan, Israel                                                   | Israel                                   |                                                         |                                                                                            |
| Nadia                             | Ouamara         |                       |                  | Centre Hospitalier Régional Metz-Thionville, Metz, France                                | France                                   |                                                         |                                                                                            |
| Rachida                           | Ouissa          |                       |                  | Centre Hospitalier Universitaire de Guadeloupe, Pointe-à-Pitre, Guadeloupe               | Guadeloupe                               |                                                         |                                                                                            |
| Eric                              | Oziol           |                       |                  | Centre Hospitalier de Béziers, Béziers, France                                           | France                                   |                                                         |                                                                                            |
| Maïder                            | Pagadoy         |                       |                  | Centre Hospitalier Universitaire de Besançon, Besançon, France                           | France                                   |                                                         |                                                                                            |
| Justine                           | Pages           |                       |                  | INSERM, Paris, France                                                                    | France                                   |                                                         |                                                                                            |
| Massimo                           | Palmarini       |                       |                  | MRC-University of Glasgow Centre for Virus Research, 464 Bearsden Road, Glasgow, UK      | United Kingdom                           |                                                         |                                                                                            |
| Giovanna                          | Panarello       |                       |                  | Istituto Mediterraneo per i Trapianti e Terapie ad Alta Specializzazione, Palermo, Italy | Italy                                    |                                                         |                                                                                            |
| Prasan Kumar                      | Panda           |                       |                  | All India Institute of Medical Sciences (AIIMS), Rishikesh, India                        | India                                    |                                                         |                                                                                            |
| Lai Hui                           | Pang            |                       |                  | Sungai Buloh Hospital, Selangor, Malaysia                                                | Malaysia                                 |                                                         |                                                                                            |
| Mauro                             | Panigada        |                       |                  | Fondazione IRCCS Ca, Milan, Italy                                                        | Italy                                    |                                                         |                                                                                            |

| *First Name and Middle Initial(s) | *Last Name       | *Suffix (eg, Jr, III) | Academic Degrees | Institution                                                                                        | Location (city, state/province, country) | Role or Contribution, eg, chair, principal investigator | Group (if more than 1 Group listed in the byline) and/or Subgroup (eg, Steering Committee) |
|-----------------------------------|------------------|-----------------------|------------------|----------------------------------------------------------------------------------------------------|------------------------------------------|---------------------------------------------------------|--------------------------------------------------------------------------------------------|
| Nathalie                          | Pansu            |                       |                  | Centre Hospitalier Universitaire de Montpellier, Montpellier, France                               | France                                   |                                                         |                                                                                            |
| Aurélie                           | Papadopoulos     |                       |                  | INSERM, Paris, France                                                                              | France                                   |                                                         |                                                                                            |
| Rachael                           | Parke            |                       |                  | Auckland City Hospital (CVICU), Auckland, New Zealand                                              | New Zealand                              |                                                         |                                                                                            |
| Melissa                           | Parker           |                       |                  | McMaster University, Hamilton, Canada                                                              | Canada                                   |                                                         |                                                                                            |
| Jérémie                           | Pasquier         |                       |                  | Centre Hospitalier Universitaire de Martinique, Fort-de-France, Saint Martin (French)              | Saint Martin (French)                    |                                                         |                                                                                            |
| Bruno                             | Pastene          |                       |                  | Hôpital de la Timone, Marseille, France                                                            | France                                   |                                                         |                                                                                            |
| Fabian                            | Patauner         |                       |                  | University of Campania, Carseta, Italy                                                             | Italy                                    |                                                         |                                                                                            |
| Drashti                           | Patel            |                       |                  | Long COVID India - Terna Specialty Hospital and Research Centre, Mumbai, India                     | India                                    |                                                         |                                                                                            |
| Mohan Dass                        | Pathmanathan     |                       |                  | National Institutes of Health (NIH), Ministry of Health Malaysia, Setia Alam, Malaysia             | Malaysia                                 |                                                         |                                                                                            |
| Luís                              | Patrão           |                       |                  | Centro Hospitalar de Tondela-Viseu, Viseu, Portugal                                                | Portugal                                 |                                                         |                                                                                            |
| Patricia                          | Patricio         |                       |                  | Hospital Beatriz Ângelo, Loures, Portugal                                                          | Portugal                                 |                                                         |                                                                                            |
| Lisa                              | Patterson        |                       |                  | Niagara Health, Niagara, Canada                                                                    | Canada                                   |                                                         |                                                                                            |
| Mical                             | Paul             |                       |                  | Rambam Hospital, Haifa, Israel                                                                     | Israel                                   |                                                         |                                                                                            |
| Christelle                        | Paul             |                       |                  | INSERM, Paris, France                                                                              | France                                   |                                                         |                                                                                            |
| Jorge                             | Paulos           |                       |                  | Hospital Curry Cabral - Intensive Care Unit - UCIP7, Lisbon, Portugal                              | Portugal                                 |                                                         |                                                                                            |
| William A.                        | Paxton           |                       |                  | Institute of Infection, Veterinary and Ecological Sciences, University of Liverpool, Liverpool, UK | United Kingdom                           |                                                         |                                                                                            |
| Jean-François                     | Payen            |                       |                  | Centre Hospitalier Universitaire Grenoble-Alpes, Grenoble, France                                  | France                                   |                                                         |                                                                                            |
| Sandra L                          | Peake            |                       |                  | Monash University, Melbourne, Australia                                                            | Australia                                |                                                         |                                                                                            |
| Kalaiarasu                        | Peariasamy       |                       |                  | National Institutes of Health (NIH), Ministry of Health Malaysia, Setia Alam, Malaysia             | Malaysia                                 |                                                         |                                                                                            |
| Miguel                            | Pedreira Jiménez |                       |                  | Hospital 12 de Octubre, Madrid, Spain                                                              | Spain                                    |                                                         |                                                                                            |



| *First Name and Middle Initial(s) | *Last Name     | *Suffix (eg, Jr, III) | Academic Degrees | Institution                                                           | Location (city, state/province, country) | Role or Contribution, eg, chair, principal investigator | Group (if more than 1 Group listed in the byline) and/or Subgroup (eg, Steering Committee) |
|-----------------------------------|----------------|-----------------------|------------------|-----------------------------------------------------------------------|------------------------------------------|---------------------------------------------------------|--------------------------------------------------------------------------------------------|
| Giles J.                          | Peek           |                       |                  | University of Florida, Gainesville, United States of America          | United States of America                 |                                                         |                                                                                            |
| Florent                           | Peelman        |                       |                  | Centre Hospitalier de Périgueux, Périgueux, France                    | France                                   |                                                         |                                                                                            |
| Nathan                            | Peiffer-Smadja |                       |                  | INSERM, Paris, France                                                 | France                                   |                                                         |                                                                                            |
| Vincent                           | Peigne         |                       |                  | Centre Hospitalier Métropole Savoie, Chambéry, France                 | France                                   |                                                         |                                                                                            |
| Mare                              | Pejkovska      |                       |                  | Mount Sinai Hospital, Toronto, Canada                                 | Canada                                   |                                                         |                                                                                            |
| Paolo                             | Pelosi         |                       |                  | San Martino Hospital, Genoa, Italy                                    | Italy                                    |                                                         |                                                                                            |
| Ithan D.                          | Peltan         |                       |                  | US NHLBI PETAL Network, Boston, United States of America              | United States of America                 |                                                         |                                                                                            |
| Rui                               | Pereira        |                       |                  | Hospital Curry Cabral - Intensive Care Unit - UCIP7, Lisbon, Portugal | Portugal                                 |                                                         |                                                                                            |
| Daniel                            | Perez          |                       |                  | Universidad del Cauca, Cauca, Colombia                                | Colombia                                 |                                                         |                                                                                            |
| Thomas                            | Perpoint       |                       |                  | Centre Hospitalier Universitaire de Lyon - HCL, Lyon, France          | France                                   |                                                         |                                                                                            |
| Antonio                           | Pesenti        |                       |                  | Fondazione IRCCS Ca, Milan, Italy                                     | Italy                                    |                                                         |                                                                                            |
| Vincent                           | Pestre         |                       |                  | Centre Hospitalier Henri Duffaut, Avignon, France                     | France                                   |                                                         |                                                                                            |
| Lenka                             | Petrou         |                       |                  | University Hospital Ostrava, Ostrava-Poruba, Czechia                  | Czechia                                  |                                                         |                                                                                            |
| Michele                           | Petrovic       |                       |                  | Humber River Hospital, Toronto, Canada                                | Canada                                   |                                                         |                                                                                            |
| Ventzislava                       | Petrov-Sanchez |                       |                  | INSERM, Paris, France                                                 | France                                   |                                                         |                                                                                            |
| Frank Olav                        | Pettersen      |                       |                  | Oslo University Hospital, Oslo, Norway                                | Norway                                   |                                                         |                                                                                            |
| Gilles                            | Peytavin       |                       |                  | INSERM, Paris, France                                                 | France                                   |                                                         |                                                                                            |
| Ooyanong                          | Phonemixay     |                       |                  | Salavan Provincial Hospital, Salavan, Laos                            | Laos                                     |                                                         |                                                                                            |
| Soulichanya                       | Phoutthavong   |                       |                  | Attapeu Provincial Hospital, Laos                                     | Laos                                     |                                                         |                                                                                            |
| Michael                           | Piagnerelli    |                       |                  | Civil Hospital Marie Curie, Charleroi, Belgium                        | Belgium                                  |                                                         |                                                                                            |
| Walter                            | Picard         |                       |                  | Centre Hospitalier de Pau, Pau, France                                | France                                   |                                                         |                                                                                            |
| Olivier                           | Picone         |                       |                  | INSERM, Paris, France                                                 | France                                   |                                                         |                                                                                            |
| Maria de                          | Piero          |                       |                  | Maastricht University Medical Centre, Maastricht, Netherlands         | Netherlands                              |                                                         |                                                                                            |

| *First Name and Middle Initial(s) | *Last Name       | *Suffix (eg, Jr, III) | Academic Degrees | Institution                                                                                                          | Location (city, state/province, country) | Role or Contribution, eg, chair, principal investigator | Group (if more than 1 Group listed in the byline) and/or Subgroup (eg, Steering Committee) |
|-----------------------------------|------------------|-----------------------|------------------|----------------------------------------------------------------------------------------------------------------------|------------------------------------------|---------------------------------------------------------|--------------------------------------------------------------------------------------------|
| Djura                             | Piersma          |                       |                  | Medisch Spectrum Twente, Zutphen, Netherlands                                                                        | Netherlands                              |                                                         |                                                                                            |
| Carlos                            | Pimentel         |                       |                  | Hospital Curry Cabral - Intensive Care Unit - UCIP7, Lisbon, Portugal                                                | Portugal                                 |                                                         |                                                                                            |
| Raquel                            | Pinto            |                       |                  | Hospital de Curry Cabral - Infectious Diseases, Lisbon, Portugal                                                     | Portugal                                 |                                                         |                                                                                            |
| Catarina                          | Pires            |                       |                  | Hospital Curry Cabral - Intensive Care Unit - UCIP7, Lisbon, Portugal                                                | Portugal                                 |                                                         |                                                                                            |
| Lionel                            | Piroth           |                       |                  | Centre Hospitalier Universitaire Mitterrand Dijon-Bourgogne, Dijon, France                                           | France                                   |                                                         |                                                                                            |
| Ayodhia                           | Pitaloka         |                       |                  | Murni Teguh Memorial Hospital and Bunda Thamrin Hospital, North Sumatera, Indonesia                                  | Indonesia                                |                                                         |                                                                                            |
| Chiara                            | Piubelli         |                       |                  | Department of Infectious, Tropical Diseases and Microbiology, IRCCS Sacro Cuore Don Calabria Hospital, Negrar, Italy | Italy                                    |                                                         |                                                                                            |
| Riinu                             | Pius             |                       |                  | Oxford University (ISARIC4C), Oxford, United Kingdom                                                                 | United Kingdom                           |                                                         |                                                                                            |
| Simone                            | Piva             |                       |                  | University of Brescia, Brescia, Italy                                                                                | Italy                                    |                                                         |                                                                                            |
| Laurent                           | Plantier         |                       |                  | Centre Hospitalier Régional et Universitaire de Tours, Tours, France                                                 | France                                   |                                                         |                                                                                            |
| Hon Shen                          | Png              |                       |                  | Kuala Lumpur Hospital, WPKL, Malaysia                                                                                | Malaysia                                 |                                                         |                                                                                            |
| Julien                            | Poissy           |                       |                  | Centre Hospitalier Universitaire de Lille, Lille, France                                                             | France                                   |                                                         |                                                                                            |
| Ryadh                             | Pokeerbux        |                       |                  | Hôpital Albert Calmette, Lille, France                                                                               | France                                   |                                                         |                                                                                            |
| Maria                             | Pokorska-Spiewak |                       |                  | Department of Children's Infectious Diseases, Warsaw, Poland                                                         | Poland                                   |                                                         |                                                                                            |
| Sergio                            | Poli             |                       |                  | Mount Sinai Medical Center, Miami, FL, United States of America                                                      | United States of America                 |                                                         |                                                                                            |
| Georgios                          | Pollakis         |                       |                  | Institute of Infection, Veterinary and Ecological Sciences, University of Liverpool, Liverpool, UK                   | United Kingdom                           |                                                         |                                                                                            |
| Diane                             | Ponscarne        |                       |                  | Hôpital Saint-Louis AP-HP, Paris, France                                                                             | France                                   |                                                         |                                                                                            |

| *First Name and Middle Initial(s) | *Last Name       | *Suffix (eg, Jr, III) | Academic Degrees | Institution                                                                    | Location (city, state/province, country) | Role or Contribution, eg, chair, principal investigator | Group (if more than 1 Group listed in the byline) and/or Subgroup (eg, Steering Committee) |
|-----------------------------------|------------------|-----------------------|------------------|--------------------------------------------------------------------------------|------------------------------------------|---------------------------------------------------------|--------------------------------------------------------------------------------------------|
| Jolanta                           | Popielska        |                       |                  | Department of Children's Infectious Diseases, Warsaw, Poland                   | Poland                                   |                                                         |                                                                                            |
| Diego Bastos                      | Porto            |                       |                  | Sao Camilo Cura D'ars, Fortaleza, Brazil                                       | Brazil                                   |                                                         |                                                                                            |
| Andra-Maris                       | Post             |                       |                  | North Estonia Medical Centre, Tallin, Estonia                                  | Estonia                                  |                                                         |                                                                                            |
| Douwe F.                          | Postma           |                       |                  | University Medical Center Groningen, Groningen, Netherlands                    | Netherlands                              |                                                         |                                                                                            |
| Pedro                             | Povoa            |                       |                  | Hospital São Francisco Xavier, Lisbon, Portugal                                | Portugal                                 |                                                         |                                                                                            |
| Diana                             | Póvoas           |                       |                  | Hospital de Curry Cabral - Infectious Diseases, Lisbon, Portugal               | Portugal                                 |                                                         |                                                                                            |
| Jeff                              | Powis            |                       |                  | Michael Garron Hospital, Toronto, Canada                                       | Canada                                   |                                                         |                                                                                            |
| Sofia                             | Prapa            |                       |                  | Sotiria General Hospital, Athens, Greece                                       | Greece                                   |                                                         |                                                                                            |
| Viladeth                          | Praphasiri       |                       |                  | Xieng Khouang Provincial Hospital, Phonsavan, Laos                             | Laos                                     |                                                         |                                                                                            |
| Sébastien                         | Preau            |                       |                  | Centre Hospitalier Universitaire de Lille, Lille, France                       | France                                   |                                                         |                                                                                            |
| Christian                         | Prebensen        |                       |                  | Akershus University Hospital, Nordbyhagen, Norway                              | Norway                                   |                                                         |                                                                                            |
| Jean-Charles                      | Preiser          |                       |                  | CUB-Hopital Erasme, Anderlecht, Belgium                                        | Belgium                                  |                                                         |                                                                                            |
| Anton                             | Prinssen         |                       |                  | Canisius Wilhelmina Ziekenhuis, Nijmegen, Netherlands                          | Netherlands                              |                                                         |                                                                                            |
| Mark G.                           | Pritchard        |                       |                  | ISARIC, Pandemic Sciences Institute, University of Oxford, UK                  | United Kingdom                           |                                                         |                                                                                            |
| Gamage Dona Dilanthi              | Priyadarshani    |                       |                  | CCA Network                                                                    | Unknown                                  |                                                         |                                                                                            |
| Lucia                             | Proença          |                       |                  | Hospital de São José -U.U.M., Lisbon, Portugal                                 | Portugal                                 |                                                         |                                                                                            |
| Sravva                            | Pudota           |                       |                  | University Hospital - Limerick, Limerick, Ireland                              | Ireland                                  |                                                         |                                                                                            |
| Bambang                           | Pujo Semedi      |                       |                  | RSUD Dr. Soetomo, Surabaya, Indonesia                                          | Indonesia                                |                                                         |                                                                                            |
| Luisa                             | Quesada          |                       |                  | Mount Sinai Medical Center, Miami, FL, United States of America                | United States of America                 |                                                         |                                                                                            |
| Vilmaris                          | Quinones-Cardona |                       |                  | St Christopher's Hospital for Children, Philadelphia, United States of America | United States of America                 |                                                         |                                                                                            |

| *First Name and Middle Initial(s) | *Last Name      | *Suffix (eg, Jr, III) | Academic Degrees | Institution                                                                                                                                                                                                            | Location (city, state/province, country) | Role or Contribution, eg, chair, principal investigator | Group (if more than 1 Group listed in the byline) and/or Subgroup (eg, Steering Committee) |
|-----------------------------------|-----------------|-----------------------|------------------|------------------------------------------------------------------------------------------------------------------------------------------------------------------------------------------------------------------------|------------------------------------------|---------------------------------------------------------|--------------------------------------------------------------------------------------------|
| Víctor                            | Quirós González |                       |                  | Hospital 12 de Octubre, Madrid, Spain                                                                                                                                                                                  | Spain                                    |                                                         |                                                                                            |
| Else                              | Quist-Paulsen   |                       |                  | Oslo University Hospital, Oslo, Norway                                                                                                                                                                                 | Norway                                   |                                                         |                                                                                            |
| Mohammed                          | Quraishi        |                       |                  | Presbyterian Hospital Services, Albuquerque, United States of America                                                                                                                                                  | United States of America                 |                                                         |                                                                                            |
| Fadi                              | Qutishat        |                       |                  | Galway University Hospital, Galway, Ireland                                                                                                                                                                            | Ireland                                  |                                                         |                                                                                            |
| Maia                              | Rabaa           |                       |                  | Pratama Rada Bolo Hospital, Karitas Hospital and Waikabubak Hospital, Sumba, Indonesia                                                                                                                                 | Indonesia                                |                                                         |                                                                                            |
| Christian                         | Rabaud          |                       |                  | Centre Hospitalier Régional et Universitaire de Nancy - Hôpitaux de Brabois, Nancy, France                                                                                                                             | France                                   |                                                         |                                                                                            |
| Aldo                              | Rafael          |                       |                  | Baylor University Medical Centre, Dallas, United States of America                                                                                                                                                     | United States of America                 |                                                         |                                                                                            |
| Marie                             | Rafiq           |                       |                  | Hôpital Purpan, Toulouse, France                                                                                                                                                                                       | France                                   |                                                         |                                                                                            |
| Mutia                             | Rahardjani      |                       |                  | Murni Teguh Memorial Hospital and Bunda Thamrin Hospital, North Sumatera, Indonesia                                                                                                                                    | Indonesia                                |                                                         |                                                                                            |
| Rozanah Abd                       | Rahman          |                       |                  | Permai Hospital, Johor, Malaysia                                                                                                                                                                                       | Malaysia                                 |                                                         |                                                                                            |
| Ahmad Kashfi Haji Ab              | Rahman          |                       |                  | Sultanah Nur Zahirah Hospital, Terengganu, Malaysia                                                                                                                                                                    | Malaysia                                 |                                                         |                                                                                            |
| Fernando                          | Rainieri        |                       |                  | Hospital de Clínicas, Buenos Aires, Argentina                                                                                                                                                                          | Argentina                                |                                                         |                                                                                            |
| Giri Shan                         | Rajahram        |                       |                  | Tawau Hospital, Sabah, Malaysia                                                                                                                                                                                        | Malaysia                                 |                                                         |                                                                                            |
| Nagarajan                         | Ramakrishnan    |                       |                  | Apollo Hospitals Chennai, Chennai, Tamil Nadu, India                                                                                                                                                                   | India                                    |                                                         |                                                                                            |
| José                              | Ramalho         |                       |                  | Hospital Curry Cabral - Intensive Care Unit - UCIP7, Lisbon, Portugal                                                                                                                                                  | Portugal                                 |                                                         |                                                                                            |
| Ahmad Afiq                        | Ramli           |                       |                  | Sungai Buloh Hospital, Selangor, Malaysia                                                                                                                                                                              | Malaysia                                 |                                                         |                                                                                            |
| Blandine                          | Rammaert        |                       |                  | Centre Hospitalier Universitaire de Poitiers, Poitiers, France                                                                                                                                                         | France                                   |                                                         |                                                                                            |
| Grazielle Viana                   | Ramos           |                       |                  | National Institute of Infectious Disease Evandro Chagas, Oswaldo Cruz Foundation (INI-FIOCRUZ), Ministry of Health, and D'Or Institute of Research and Education (IDOR), Rio de Janeiro, Gaspar Viana Pavilion, Brazil | Brazil                                   |                                                         |                                                                                            |

| *First Name and Middle Initial(s) | *Last Name | *Suffix (eg, Jr, III) | Academic Degrees | Institution                                                                                   | Location (city, state/province, country) | Role or Contribution, eg, chair, principal investigator | Group (if more than 1 Group listed in the byline) and/or Subgroup (eg, Steering Committee) |
|-----------------------------------|------------|-----------------------|------------------|-----------------------------------------------------------------------------------------------|------------------------------------------|---------------------------------------------------------|--------------------------------------------------------------------------------------------|
| Rajavardhan                       | Rangappa   |                       |                  | Manipal Hospital Whitefield, Bangalore, India                                                 | India                                    |                                                         |                                                                                            |
| Ritika                            | Ranjan     |                       |                  | Galway University Hospital, Galway, Ireland                                                   | Ireland                                  |                                                         |                                                                                            |
| Christophe                        | Rapp       |                       |                  | Hôpital Américain de Paris, Neuilly-sur-Seine, France                                         | France                                   |                                                         |                                                                                            |
| Aasiyah                           | Rashan     |                       |                  | Network for Improving Critical care Systems and Training, Colombo, Sri Lanka                  | Unknown                                  |                                                         |                                                                                            |
| Thalha                            | Rashan     |                       |                  | CCA Network                                                                                   | Unknown                                  |                                                         |                                                                                            |
| Menaldi                           | Rasmin     |                       |                  | Persahabatan Hospital, Jakarta, Indonesia                                                     | Indonesia                                |                                                         |                                                                                            |
| Indrek                            | Rätsep     |                       |                  | Clinic of Anesthesiology and Intensive Care, North Estonia Medical Centre, Tallinn, Estonia   | Estonia                                  |                                                         |                                                                                            |
| Cornelius                         | Rau        |                       |                  | University Children's Hospital, University Medical Center Hamburg-Eppendorf, Hamburg, Germany | Germany                                  |                                                         |                                                                                            |
| Tharmini                          | Ravi       |                       |                  | Sungai Buloh Hospital, Selangor, Malaysia                                                     | Malaysia                                 |                                                         |                                                                                            |
| Andre                             | Real       |                       |                  | Hospital de Abrantes - ICU, Abrantes, Portugal                                                | Portugal                                 |                                                         |                                                                                            |
| Stanislas                         | Rebaudet   |                       |                  | Hôpital Européen Marseille, Marseille, France                                                 | France                                   |                                                         |                                                                                            |
| Sarah                             | Redl       |                       |                  | Centre Hospitalier Agen-Nérac, Agen, France                                                   | France                                   |                                                         |                                                                                            |
| Brenda                            | Reeve      |                       |                  | Brantford General Hospital, Brantford, Canada                                                 | Canada                                   |                                                         |                                                                                            |
| Dag Henrik                        | Reikvam    |                       |                  | Oslo University Hospital, Oslo, Norway                                                        | Norway                                   |                                                         |                                                                                            |
| Renato                            | Reis       |                       |                  | Hospital Santa Maria, Centro Hospitalar Universitário Lisboa Norte, Amadora, Portugal         | Portugal                                 |                                                         |                                                                                            |
| Jordi                             | Rello      |                       |                  | Vall d'Hebron Institute of Research, Barcelona, Spain                                         | Spain                                    |                                                         |                                                                                            |
| Jonathan                          | Remppis    |                       |                  | University Hospital of Tübingen, Tübingen, Germany                                            | Germany                                  |                                                         |                                                                                            |
| Martine                           | Remy       |                       |                  | Centre Hospitalier Universitaire de Lille, Lille, France                                      | France                                   |                                                         |                                                                                            |
| Hongru                            | Ren        |                       |                  | University of Manitoba, Manitoba, Canada                                                      | Canada                                   |                                                         |                                                                                            |
| Hanna                             | Renk       |                       |                  | University Hospital of Tübingen, Tübingen, Germany                                            | Germany                                  |                                                         |                                                                                            |

| *First Name and Middle Initial(s) | *Last Name   | *Suffix (eg, Jr, III) | Academic Degrees | Institution                                                                                 | Location (city, state/province, country) | Role or Contribution, eg, chair, principal investigator | Group (if more than 1 Group listed in the byline) and/or Subgroup (eg, Steering Committee) |
|-----------------------------------|--------------|-----------------------|------------------|---------------------------------------------------------------------------------------------|------------------------------------------|---------------------------------------------------------|--------------------------------------------------------------------------------------------|
| Anne-Sophie                       | Resseguier   |                       |                  | Centre Hospitalier Emile Roux, Le Puy-en-Velay, France                                      | France                                   |                                                         |                                                                                            |
| Matthieu                          | Revest       |                       |                  | Centre Hospitalier Universitaire Rennes (Hôpital Pontchaillou), Rennes, France              | France                                   |                                                         |                                                                                            |
| Oleksa                            | Rewa         |                       |                  | University of Alberta Adult ICU, Edmonton, Canada                                           | Canada                                   |                                                         |                                                                                            |
| Luis Felipe                       | Reyes        |                       |                  | Universidad de La Sabana, Chia, Colombia                                                    | Colombia                                 |                                                         |                                                                                            |
| Maria Ines                        | Ribeiro      |                       |                  | Hospital Espírito Santo de Évora, Évora, Portugal                                           | Portugal                                 |                                                         |                                                                                            |
| Antonia                           | Ricchiuto    |                       |                  | Università Cattolica del Sacro Cuore, Rome, Italy                                           | Italy                                    |                                                         |                                                                                            |
| David                             | Richardson   |                       |                  | William Osler Health Sciences System - Etobicoke General Hospital, Toronto, Canada          | Canada                                   |                                                         |                                                                                            |
| Denise                            | Richardson   |                       |                  | University of Cincinnati, Cincinnati, United States of America                              | United States of America                 |                                                         |                                                                                            |
| Laurent                           | Richier      |                       |                  | Centre Hospitalier Intercommunal Villeneuve-Saint-Georges, Villeneuve-Saint-Georges, France | France                                   |                                                         |                                                                                            |
| Siti Nurul Atikah Ahmad           | Ridzuan      |                       |                  | Sultanah Nur Zahirah Hospital, Terengganu, Malaysia                                         | Malaysia                                 |                                                         |                                                                                            |
| Ana L                             | Rios         |                       |                  | Centro Hospitalar Vila Nova de Gaia/Espinho, Espinho, Portugal                              | Portugal                                 |                                                         |                                                                                            |
| Asgar                             | Rishu        |                       |                  | Sunnybrook Health Sciences Centre, Toronto, Canada                                          | Canada                                   |                                                         |                                                                                            |
| Patrick                           | Rispal       |                       |                  | Centre Hospitalier Agen-Nérac, Agen, France                                                 | France                                   |                                                         |                                                                                            |
| Karine                            | Risso        |                       |                  | Centre Hospitalier Universitaire de Nice (Hôpital Archet), Nice, France                     | France                                   |                                                         |                                                                                            |
| Maria Angelica                    | Rivera Nuñez |                       |                  | La Paz Hospital, Madrid, Spain                                                              | Spain                                    |                                                         |                                                                                            |
| Chiara                            | Robba        |                       |                  | San Martino Hospital, Genoa, Italy                                                          | Italy                                    |                                                         |                                                                                            |
| André                             | Roberto      |                       |                  | Hospital de São José -U.U.M., Lisbon, Portugal                                              | Portugal                                 |                                                         |                                                                                            |
| Charles                           | Roberts      |                       |                  | Clinical Services Department Fajara, Gambia                                                 | Gambia                                   |                                                         |                                                                                            |
| David L.                          | Robertson    |                       |                  | MRC-University of Glasgow Centre for Virus Research, 464 Bearsden Road, Glasgow, UK         | United Kingdom                           |                                                         |                                                                                            |

| *First Name and Middle Initial(s) | *Last Name         | *Suffix (eg, Jr, III) | Academic Degrees | Institution                                                                              | Location (city, state/province, country) | Role or Contribution, eg, chair, principal investigator | Group (if more than 1 Group listed in the byline) and/or Subgroup (eg, Steering Committee) |
|-----------------------------------|--------------------|-----------------------|------------------|------------------------------------------------------------------------------------------|------------------------------------------|---------------------------------------------------------|--------------------------------------------------------------------------------------------|
| Olivier                           | Robineau           |                       |                  | Centre Hospitalier de Tourcoing, Tourcoing, France                                       | France                                   |                                                         |                                                                                            |
| Anna                              | Roca               |                       |                  | Clinical Services Department Fajara, Gambia                                              | Gambia                                   |                                                         |                                                                                            |
| Ferran                            | Roche-Campo        |                       |                  | Hospital Verge de la Cinta, Tortosa, Spain                                               | Spain                                    |                                                         |                                                                                            |
| Paola                             | Rodari             |                       |                  | Ospedale Sacro Cuore Don Calabria, Negrar Di Valpolicella, Italy                         | Italy                                    |                                                         |                                                                                            |
| Simão                             | Rodeia             |                       |                  | Hospital de São José -U.U.M., Lisbon, Portugal                                           | Portugal                                 |                                                         |                                                                                            |
| Bernhard                          | Roessler           |                       |                  | Medical University of Vienna, Vienna, Austria                                            | Austria                                  |                                                         |                                                                                            |
| Claire                            | Roger              |                       |                  | CHU Carémeau, Nimes, France                                                              | France                                   |                                                         |                                                                                            |
| Pierre-Marie                      | Roger              |                       |                  | Centre Hospitalier Universitaire de Guadeloupe, Pointe-à-Pitre, Guadeloupe               | Guadeloupe                               |                                                         |                                                                                            |
| Emmanuel                          | Roilides           |                       |                  | Hippokration Hospital, Thessaloniki, Greece                                              | Greece                                   |                                                         |                                                                                            |
| Amanda                            | Rojek              |                       |                  | Royal Melbourne Hospital, Melbourne, Australia                                           | United Kingdom                           |                                                         |                                                                                            |
| Roberto                           | Roncon-Albuquerque | Jr                    |                  | São João Hospital Centre, Porto, Portugal                                                | Portugal                                 |                                                         |                                                                                            |
| Mélanie                           | Roriz              |                       |                  | Centre Hospitalier Agen-Nérac, Agen, France                                              | France                                   |                                                         |                                                                                            |
| Manuel                            | Rosa-Calatrava     |                       |                  | INSERM, Paris, France                                                                    | France                                   |                                                         |                                                                                            |
| Michael                           | Rose               |                       |                  | McLeod Healthcare System, Florence, United States of America                             | United States of America                 |                                                         |                                                                                            |
| Dorothea                          | Rosenberger        |                       |                  | University of Utah, Salt Lake City, United States of America                             | United States of America                 |                                                         |                                                                                            |
| Andrea                            | Rossanese          |                       |                  | Ospedale Sacro Cuore Don Calabria, Negrar Di Valpolicella, Italy                         | Italy                                    |                                                         |                                                                                            |
| Matteo                            | Rossetti           |                       |                  | Istituto Mediterraneo per i Trapianti e Terapie ad Alta Specializzazione, Palermo, Italy | Italy                                    |                                                         |                                                                                            |
| Patrick                           | Rossignol          |                       |                  | INSERM, Paris, France                                                                    | France                                   |                                                         |                                                                                            |
| Carine                            | Roy                |                       |                  | INSERM, Paris, France                                                                    | France                                   |                                                         |                                                                                            |
| Benoît                            | Roze               |                       |                  | Centre Hospitalier de Saintonge, Saintes, France                                         | France                                   |                                                         |                                                                                            |
| Desy                              | Rusmawatingtyas    |                       |                  | Dr Sardjito Government Hospital (Paediatric), Yogyakarta, Indonesia                      | Indonesia                                |                                                         |                                                                                            |

| *First Name and Middle Initial(s) | *Last Name          | *Suffix (eg, Jr, III) | Academic Degrees | Institution                                                                                                                                 | Location (city, state/province, country) | Role or Contribution, eg, chair, principal investigator | Group (if more than 1 Group listed in the byline) and/or Subgroup (eg, Steering Committee) |
|-----------------------------------|---------------------|-----------------------|------------------|---------------------------------------------------------------------------------------------------------------------------------------------|------------------------------------------|---------------------------------------------------------|--------------------------------------------------------------------------------------------|
| Clark D.                          | Russell             |                       |                  | Centre for Inflammation Research, The Queen's Medical Research Institute, University of Edinburgh, 47 Little France Crescent, Edinburgh, UK | United Kingdom                           |                                                         |                                                                                            |
| Maeve                             | Ryan                |                       |                  | Galway University Hospital, Galway, Ireland                                                                                                 | Ireland                                  |                                                         |                                                                                            |
| Steffi                            | Ryckaert            |                       |                  | AZ Maria Middelaes, Gent, Belgium                                                                                                           | Belgium                                  |                                                         |                                                                                            |
| Aleksander                        | Rygh Holten         |                       |                  | Oslo University Hospital, Oslo, Norway                                                                                                      | Norway                                   |                                                         |                                                                                            |
| Isabela                           | Saba                |                       |                  | Mount Sinai Medical Center, Miami, FL, United States of America                                                                             | United States of America                 |                                                         |                                                                                            |
| Musharaf                          | Sadat               |                       |                  | King Abdulaziz Medical City, Riyadh, Saudi Arabia                                                                                           | Saudi Arabia                             |                                                         |                                                                                            |
| Valla                             | Sahraei             |                       |                  | Lions Gate Hospital, Vancouver, Canada                                                                                                      | Canada                                   |                                                         |                                                                                            |
| Pranya                            | Sakiyalak           |                       |                  | Siriraj Piyamaharajkarun Hospital (SiPH), Bangkok, Thailand                                                                                 | Thailand                                 |                                                         |                                                                                            |
| Leonardo                          | Salazar             |                       |                  | Fundación Cardiovascular de Colombia, Floridablanca, Colombia                                                                               | Colombia                                 |                                                         |                                                                                            |
| Gabriele                          | Sales               |                       |                  | Ospedale Molinette, Torino, Italy                                                                                                           | Italy                                    |                                                         |                                                                                            |
| Charlotte                         | Salmon Gandonniere  |                       |                  | Centre Hospitalier Régional et Universitaire de Tours, Tours, France                                                                        | France                                   |                                                         |                                                                                            |
| Hélène                            | Salvator            |                       |                  | Hôpital Foch, Suresnes, France                                                                                                              | France                                   |                                                         |                                                                                            |
| Emely                             | Sanchez             |                       |                  | University of Nebraska Medical Centre                                                                                                       | United States of America                 |                                                         |                                                                                            |
| Olivier                           | Sanchez             |                       |                  | Hôpital Européen Georges-Pompidou AP-HP, Paris, France                                                                                      | France                                   |                                                         |                                                                                            |
| Kizy                              | Sanchez de Oliveira |                       |                  | Hospital Sirio-Libanes, Sao Paulo, Brazil                                                                                                   | Brazil                                   |                                                         |                                                                                            |
| Angel                             | Sanchez-Miralles    |                       |                  | Hospital Universitari Sant Joan D'Alacant, Alicante, Spain                                                                                  | Spain                                    |                                                         |                                                                                            |
| Vanessa                           | Sancho-Shimizu      |                       |                  | Department of Pediatrics and Virology, St Mary's Medical School Bldg, Imperial College London, London, UK                                   | United Kingdom                           |                                                         |                                                                                            |
| Gyan                              | Sandhu              |                       |                  | Unity Health Toronto, Toronto, Canada                                                                                                       | Canada                                   |                                                         |                                                                                            |
| Zulfiqar                          | Sandhu              |                       |                  | Wexford General Hospital, Wexford, Ireland                                                                                                  | Ireland                                  |                                                         |                                                                                            |



| *First Name and Middle Initial(s) | *Last Name            | *Suffix (eg, Jr, III) | Academic Degrees | Institution                                                                           | Location (city, state/province, country) | Role or Contribution, eg, chair, principal investigator | Group (if more than 1 Group listed in the byline) and/or Subgroup (eg, Steering Committee) |
|-----------------------------------|-----------------------|-----------------------|------------------|---------------------------------------------------------------------------------------|------------------------------------------|---------------------------------------------------------|--------------------------------------------------------------------------------------------|
| Pierre-François                   | Sandrine              |                       |                  | Centre Hospitalier Universitaire de Martinique, Fort-de-France, Saint Martin (French) | Saint Martin (French)                    |                                                         |                                                                                            |
| Marlene                           | Santos                |                       |                  | Unity Health Toronto, Toronto, Canada                                                 | Canada                                   |                                                         |                                                                                            |
| Shirley                           | Sarfo-Mensah          |                       |                  | The Ottawa Hospital, Ottawa, Canada                                                   | Canada                                   |                                                         |                                                                                            |
| Bruno                             | Sarmiento<br>Banheiro |                       |                  | Centro Hospitalar Universitário do Algarve, Portimão, Portugal                        | Portugal                                 |                                                         |                                                                                            |
| Iam Claire E.                     | Sarmiento             |                       |                  | Northwell Health, New York, United States of America                                  | United States of America                 |                                                         |                                                                                            |
| Benjamine                         | Sarton                |                       |                  | Hôpital Purpan, Toulouse, France                                                      | France                                   |                                                         |                                                                                            |
| Ankana                            | Satya                 |                       |                  | Long COVID India - Terna Specialty Hospital and Research Centre, Mumbai, India        | India                                    |                                                         |                                                                                            |
| Sree                              | Satyapriya            |                       |                  | Ohio State University, Columbus, United States of America                             | United States of America                 |                                                         |                                                                                            |
| Rumaisah                          | Satyawati             |                       |                  | RSPI Prof Dr Sulianti Saroso, Jakarta, Indonesia                                      | Indonesia                                |                                                         |                                                                                            |
| Egle                              | Saviciute             |                       |                  | Oxford University (ISARIC4C), Oxford, United Kingdom                                  | United Kingdom                           |                                                         |                                                                                            |
| Parthena                          | Savvidou              |                       |                  | Hippokration Hospital, Thessaloniki, Greece                                           | Greece                                   |                                                         |                                                                                            |
| Yen Tsen                          | Saw                   |                       |                  | Queen Elizabeth Hospital, Sabah, Malaysia                                             | Malaysia                                 |                                                         |                                                                                            |
| Justin                            | Schaffer              |                       |                  | The Heart Hospital Baylor Plano, Plano, United States of America                      | United States of America                 |                                                         |                                                                                            |
| Tjard                             | Schermer              |                       |                  | Gelre Hospitals, Zutphen, Netherlands                                                 | Netherlands                              |                                                         |                                                                                            |
| Arnaud                            | Scherpereel           |                       |                  | Hôpital Albert Calmette, Lille, France                                                | France                                   |                                                         |                                                                                            |
| Marion                            | Schneider             |                       |                  | INSERM, Paris, France                                                                 | France                                   |                                                         |                                                                                            |
| Michael                           | Schwameis             |                       |                  | Medical University of Vienna, Vienna, Austria                                         | Austria                                  |                                                         |                                                                                            |
| Gary                              | Schwartz              |                       |                  | Baylor AllSaints Medical Centre, Fort Worth, United States of America                 | United States of America                 |                                                         |                                                                                            |
| Janet T.                          | Scott                 |                       |                  | MRC-University of Glasgow Centre for Virus Research, 464 Bearsden Road, Glasgow, UK   | United Kingdom                           |                                                         |                                                                                            |
| James                             | Scott-Brown           |                       |                  | Oxford University (ISARIC4C), Oxford, United Kingdom                                  | United Kingdom                           |                                                         |                                                                                            |

| *First Name and Middle Initial(s) | *Last Name       | *Suffix (eg, Jr, III) | Academic Degrees | Institution                                                                                                                             | Location (city, state/province, country) | Role or Contribution, eg, chair, principal investigator | Group (if more than 1 Group listed in the byline) and/or Subgroup (eg, Steering Committee) |
|-----------------------------------|------------------|-----------------------|------------------|-----------------------------------------------------------------------------------------------------------------------------------------|------------------------------------------|---------------------------------------------------------|--------------------------------------------------------------------------------------------|
| Nicholas                          | Sedillot         |                       |                  | Centre Hospitalier de Bourg-en-Bresse, Bourg-en-Bresse, France                                                                          | France                                   |                                                         |                                                                                            |
| Tamara                            | Seitz            |                       |                  | Sozialmedizinisches Zentrum Sud, Vienna, Austria                                                                                        | Austria                                  |                                                         |                                                                                            |
| Mageswari                         | Selvarajoo       |                       |                  | Sungai Buloh Hospital, Selangor, Malaysia                                                                                               | Malaysia                                 |                                                         |                                                                                            |
| Malcolm G.                        | Semple           |                       |                  | Institute of Infection, Veterinary and Ecological Sciences, Faculty of Health and Life Sciences, University of Liverpool, Liverpool, UK | United Kingdom                           |                                                         |                                                                                            |
| Rasidah Bt                        | Senian           |                       |                  | Kuala Lumpur Hospital, WPKL, Malaysia                                                                                                   | Malaysia                                 |                                                         |                                                                                            |
| Eric                              | Senneville       |                       |                  | Centre Hospitalier de Tourcoing, Tourcoing, France                                                                                      | France                                   |                                                         |                                                                                            |
| Claudia                           | Sepulveda        |                       |                  | Instituto Nacional Del Tórax, Santiago, Chile                                                                                           | Chile                                    |                                                         |                                                                                            |
| Filipa                            | Sequeira         |                       |                  | Centro Hospitalar de Leiria, Leiria, Portugal                                                                                           | Portugal                                 |                                                         |                                                                                            |
| Tânia                             | Sequeira         |                       |                  | Hospital Curry Cabral - Intensive Care Unit - UCIP7, Lisbon, Portugal                                                                   | Portugal                                 |                                                         |                                                                                            |
| Ary                               | Serpa Neto       |                       |                  | Monash University, Melbourne, Australia                                                                                                 | Australia                                |                                                         |                                                                                            |
| Pablo                             | Serrano Balazote |                       |                  | Hospital 12 de Octubre, Madrid, Spain                                                                                                   | Spain                                    |                                                         |                                                                                            |
| Ellen                             | Shadowitz        |                       |                  | Sunnybrook Health Sciences Centre, Toronto, Canada                                                                                      | Canada                                   |                                                         |                                                                                            |
| Syamin Asyraf                     | Shahidan         |                       |                  | Kuala Lumpur Hospital, WPKL, Malaysia                                                                                                   | Malaysia                                 |                                                         |                                                                                            |
| Anuraj                            | Shankar          |                       |                  | Murni Teguh Memorial Hospital and Bunda Thamrin Hospital, North Sumatera, Indonesia                                                     | Indonesia                                |                                                         |                                                                                            |
| Shaikh                            | Sharjeel         |                       |                  | Wexford General Hospital, Wexford, Ireland                                                                                              | Ireland                                  |                                                         |                                                                                            |
| Pratima                           | Sharma           |                       |                  | University of Michigan Schools of Medicine & Public Health, Michigan, USA                                                               | United States of America                 |                                                         |                                                                                            |
| Catherine A.                      | Shaw             |                       |                  | Oxford University (ISARIC4C), Oxford, United Kingdom                                                                                    | United Kingdom                           |                                                         |                                                                                            |
| Victoria                          | Shaw             |                       |                  | Oxford University (ISARIC4C), Oxford, United Kingdom                                                                                    | United Kingdom                           |                                                         |                                                                                            |
| John Robert                       | Sheenan          |                       |                  | Galway University Hospital, Galway, Ireland                                                                                             | Ireland                                  |                                                         |                                                                                            |

| *First Name and Middle Initial(s) | *Last Name   | *Suffix (eg, Jr, III) | Academic Degrees | Institution                                                                    | Location (city, state/province, country) | Role or Contribution, eg, chair, principal investigator | Group (if more than 1 Group listed in the byline) and/or Subgroup (eg, Steering Committee) |
|-----------------------------------|--------------|-----------------------|------------------|--------------------------------------------------------------------------------|------------------------------------------|---------------------------------------------------------|--------------------------------------------------------------------------------------------|
| Rohan                             | Shetty       |                       |                  | Long COVID India - Terna Specialty Hospital and Research Centre, Mumbai, India | India                                    |                                                         |                                                                                            |
| Dr. Rajesh Mohan                  | Shetty       |                       |                  | Manipal Hospital Whitefield, Bangalore, India                                  | India                                    |                                                         |                                                                                            |
| Mohiuddin                         | Shiekh       |                       |                  | CCA Network                                                                    | Unknown                                  |                                                         |                                                                                            |
| Nobuaki                           | Shime        |                       |                  | Hiroshima University, Hiroshima, Japan                                         | Japan                                    |                                                         |                                                                                            |
| Hiroaki                           | Shimizu      |                       |                  | Hyogo Prefectural Kakogawa Medical Center, Hyogo, Japan                        | Japan                                    |                                                         |                                                                                            |
| Keiki                             | Shimizu      |                       |                  | Tokyo Metropolitan Tama Medical Center, Tokyo, Japan                           | Japan                                    |                                                         |                                                                                            |
| Sally                             | Shrapnel     |                       |                  | University of Queensland, Brisbane, Australia                                  | Australia                                |                                                         |                                                                                            |
| Hoi Ping                          | Shum         |                       |                  | Pamela Youde Nethersole Eastern Hospital, Chai Wan, China                      | China                                    |                                                         |                                                                                            |
| Nassima                           | Si Mohammed  |                       |                  | INSERM, Paris, France                                                          | France                                   |                                                         |                                                                                            |
| Ng Yong                           | Siang        |                       |                  | Permai Hospital, Johor, Malaysia                                               | Malaysia                                 |                                                         |                                                                                            |
| Jeanne                            | Sibiude      |                       |                  | Hôpital Louis-Mourier, Colombes, France                                        | France                                   |                                                         |                                                                                            |
| Bountoy                           | Sibounheuang |                       |                  | Salavan Provincial Hospital, Salavan, Laos                                     | Laos                                     |                                                         |                                                                                            |
| Atif                              | Siddiqui     |                       |                  | Grand River Hospital, Kitchener, Canada                                        | Canada                                   |                                                         |                                                                                            |
| Louise                            | Sigfrid      |                       |                  | ISARIC, Pandemic Sciences Institute, University of Oxford, UK                  | United Kingdom                           |                                                         |                                                                                            |
| Fatoumata                         | Sillah       |                       |                  | Clinical Services Department Fajara, Gambia                                    | Gambia                                   |                                                         |                                                                                            |
| Piret                             | Sillaots     |                       |                  | North Estonia Medical Centre, Tallin, Estonia                                  | Estonia                                  |                                                         |                                                                                            |
| Catarina                          | Silva        |                       |                  | Centro Hospital e Universitário de Coimbra, Coimbra, Portugal                  | Portugal                                 |                                                         |                                                                                            |
| Rogério                           | Silva        |                       |                  | Unidade Local de Saúde de Alto Minho, Viana Do Castelo, Portugal               | Portugal                                 |                                                         |                                                                                            |
| Maria Joao                        | Silva        |                       |                  | Centro Hospitalar Universitário do Porto (CHUP), Porto, Portugal               | Portugal                                 |                                                         |                                                                                            |
| Benedict                          | Sim Lim Heng |                       |                  | Hospital Sungai Buloh, Ministry of Health, Selangor, Malaysia                  | Malaysia                                 |                                                         |                                                                                            |
| Wai Ching                         | Sin          |                       |                  | Queen Mary Hospital, Pok Fu Lam, China                                         | China                                    |                                                         |                                                                                            |
| Dario                             | Sinatti      |                       |                  | Università Cattolica del Sacro Cuore, Rome, Italy                              | Italy                                    |                                                         |                                                                                            |

| *First Name and Middle Initial(s) | *Last Name | *Suffix (eg, Jr, III) | Academic Degrees | Institution                                                                                                                                                                   | Location (city, state/province, country) | Role or Contribution, eg, chair, principal investigator | Group (if more than 1 Group listed in the byline) and/or Subgroup (eg, Steering Committee) |
|-----------------------------------|------------|-----------------------|------------------|-------------------------------------------------------------------------------------------------------------------------------------------------------------------------------|------------------------------------------|---------------------------------------------------------|--------------------------------------------------------------------------------------------|
| Punam                             | Singh      |                       |                  | University Hospital - Waterford, Waterford, Ireland                                                                                                                           | Ireland                                  |                                                         |                                                                                            |
| Mahendra                          | Singh      |                       |                  | Department of Community and Family Medicine, AIIMS, Rishikesh, India                                                                                                          | India                                    |                                                         |                                                                                            |
| Pompini Agustina                  | Sitompul   |                       |                  | RSPI Prof Dr Sulianti Saroso, Jakarta, Indonesia                                                                                                                              | Indonesia                                |                                                         |                                                                                            |
| Karisha                           | Sivam      |                       |                  | Sungai Buloh Hospital, Selangor, Malaysia                                                                                                                                     | Malaysia                                 |                                                         |                                                                                            |
| Vegard                            | Skogen     |                       |                  | University Hospital of North Norway, Tromsø, Norway                                                                                                                           | Norway                                   |                                                         |                                                                                            |
| Sue                               | Smith      |                       |                  | ISARIC Global Support Centre, Oxford, United Kingdom                                                                                                                          | United Kingdom                           |                                                         |                                                                                            |
| Benjamin                          | Smood      |                       |                  | Perelman School of Medicine at the University of Pennsylvania, Philadelphia, United States of America                                                                         | United States of America                 |                                                         |                                                                                            |
| Coilin                            | Smyth      |                       |                  | University Hospital - Waterford, Waterford, Ireland                                                                                                                           | Ireland                                  |                                                         |                                                                                            |
| Morgane                           | Snacken    |                       |                  | CUB-Hopital Erasme, Anderlecht, Belgium                                                                                                                                       | Belgium                                  |                                                         |                                                                                            |
| Dominic                           | So         |                       |                  | Princess Margaret Hospital, Kwai Hung, China                                                                                                                                  | China                                    |                                                         |                                                                                            |
| Tze Vee                           | Soh        |                       |                  | Tengku Ampuan Afzan Hospital, Pahang, Malaysia                                                                                                                                | Malaysia                                 |                                                         |                                                                                            |
| Lene Bergendal                    | Solberg    |                       |                  | The Norwegian Corona Cohort, Oslo, Norway                                                                                                                                     | Norway                                   |                                                         |                                                                                            |
| Joshua                            | Solomon    |                       |                  | McGill University Health Centre, Montreal, Canada                                                                                                                             | Canada                                   |                                                         |                                                                                            |
| Tom                               | Solomon    |                       |                  | NIHR Health Protection Research Unit, Institute of Infection, Veterinary and Ecological Sciences, Faculty of Health and Life Sciences, University of Liverpool, Liverpool, UK | United Kingdom                           |                                                         |                                                                                            |
| Emily                             | Somers     |                       |                  | University of Michigan Schools of Medicine & Public Health, Michigan, USA                                                                                                     | United States of America                 |                                                         |                                                                                            |
| Agnès                             | Sommet     |                       |                  | Centre Hospitalier Universitaire Toulouse (Larrey), Toulouse, France                                                                                                          | France                                   |                                                         |                                                                                            |

| *First Name and Middle Initial(s) | *Last Name   | *Suffix (eg, Jr, III) | Academic Degrees | Institution                                                                                           | Location (city, state/province, country) | Role or Contribution, eg, chair, principal investigator | Group (if more than 1 Group listed in the byline) and/or Subgroup (eg, Steering Committee) |
|-----------------------------------|--------------|-----------------------|------------------|-------------------------------------------------------------------------------------------------------|------------------------------------------|---------------------------------------------------------|--------------------------------------------------------------------------------------------|
| Rima                              | Song         |                       |                  | Middlemore Hospital (Canties Manukan Health), Otahuhu, New Zealand                                    | New Zealand                              |                                                         |                                                                                            |
| Myung Jin                         | Song         |                       |                  | Seoul National University Bundang Hospital, Seoul, South Korea                                        | South Korea                              |                                                         |                                                                                            |
| Tae                               | Song         |                       |                  | University of Chicago, Chicago, United States of America                                              | United States of America                 |                                                         |                                                                                            |
| Jack                              | Song Chia    |                       |                  | Galway University Hospital, Galway, Ireland                                                           | Ireland                                  |                                                         |                                                                                            |
| Arne                              | Søraas       |                       |                  | The Norwegian Corona Cohort, Oslo, Norway                                                             | Norway                                   |                                                         |                                                                                            |
| Albert                            | Sotto        |                       |                  | Centre Hospitalier Universitaire de Nîmes, Nîmes, France                                              | France                                   |                                                         |                                                                                            |
| Edouard                           | Soum         |                       |                  | Centre Hospitalier de Périgueux, Périgueux, France                                                    | France                                   |                                                         |                                                                                            |
| Marta                             | Sousa        |                       |                  | Hospital Santa Maria, Centro Hospitalar Universitário Lisboa Norte, Amadora, Portugal                 | Portugal                                 |                                                         |                                                                                            |
| Ana Chora                         | Sousa        |                       |                  | Hospital Espírito Santo de Évora, Évora, Portugal                                                     | Portugal                                 |                                                         |                                                                                            |
| Maria                             | Sousa Uva    |                       |                  | Hospital Santa Maria, Centro Hospitalar Universitário Lisboa Norte, Amadora, Portugal                 | Portugal                                 |                                                         |                                                                                            |
| Vicente                           | Souza-Dantas |                       |                  | Hospital Universitário Clementino Fraga Filho, Rio de Janeiro, Brazil                                 | Brazil                                   |                                                         |                                                                                            |
| Alexandra                         | Sperry       |                       |                  | Perelman School of Medicine at the University of Pennsylvania, Philadelphia, United States of America | United States of America                 |                                                         |                                                                                            |
| Elisabetta                        | Spinuzza     |                       |                  | University Hospital Policlinico Paolo Giaccone, Palermo, Italy                                        | Italy                                    |                                                         |                                                                                            |
| B. P. Sanka Ruwan                 | Sri Darshana |                       |                  | CCA Network                                                                                           | Unknown                                  |                                                         |                                                                                            |
| Shiranee                          | Sriskandan   |                       |                  | Department of Infectious Disease, Imperial College London, London, UK                                 | United Kingdom                           |                                                         |                                                                                            |
| Sarah                             | Stabler      |                       |                  | Centre Hospitalier Universitaire de Lille, Lille, France                                              | France                                   |                                                         |                                                                                            |
| Thomas                            | Staudinger   |                       |                  | Medical University of Vienna, Vienna, Austria                                                         | Austria                                  |                                                         |                                                                                            |
| Stephanie-Susanne                 | Stecher      |                       |                  | LMU Hospital Munich, Medical Department II, Campus Großhadern, Munich, Germany                        | Germany                                  |                                                         |                                                                                            |

| *First Name and Middle Initial(s) | *Last Name     | *Suffix (eg, Jr, III) | Academic Degrees | Institution                                                                                                                   | Location (city, state/province, country) | Role or Contribution, eg, chair, principal investigator | Group (if more than 1 Group listed in the byline) and/or Subgroup (eg, Steering Committee) |
|-----------------------------------|----------------|-----------------------|------------------|-------------------------------------------------------------------------------------------------------------------------------|------------------------------------------|---------------------------------------------------------|--------------------------------------------------------------------------------------------|
| Trude                             | Steinsvik      |                       |                  | Baerum Sykehus, Gjøttum, Norway                                                                                               | Norway                                   |                                                         |                                                                                            |
| Ymkje                             | Stienstra      |                       |                  | University Medical Center Groningen, Groningen, Netherlands                                                                   | Netherlands                              |                                                         |                                                                                            |
| Birgitte                          | Stiksrud       |                       |                  | Oslo University Hospital, Oslo, Norway                                                                                        | Norway                                   |                                                         |                                                                                            |
| Eva                               | Stolz          |                       |                  | Beaumont Hospital, Dublin, Ireland                                                                                            | Ireland                                  |                                                         |                                                                                            |
| Amy                               | Stone          |                       |                  | Cork University Hospital, Cork, Ireland                                                                                       | Ireland                                  |                                                         |                                                                                            |
| Adrian                            | Streinu-Cercel |                       |                  | National Institute for Infectious Diseases Matei Bals, Bucharest, Romania                                                     | Romania                                  |                                                         |                                                                                            |
| Anca                              | Streinu-Cercel |                       |                  | Carol Davila University of Medicine and Pharmacy, Bucharest, Romania                                                          | Romania                                  |                                                         |                                                                                            |
| Ami                               | Stuart         |                       |                  | University of Utah, Salt Lake City, United States of America                                                                  | United States of America                 |                                                         |                                                                                            |
| David                             | Stuart         |                       |                  | Division of Structural Biology, The Wellcome Centre for Human Genetics, University of Oxford, Headington, Oxford, OX3 7BN, UK | United Kingdom                           |                                                         |                                                                                            |
| Richa                             | Su             |                       |                  | Hôpital Bichat Claude-Bernard AP-HP, Paris, France                                                                            | France                                   |                                                         |                                                                                            |
| Decy                              | Subekti        |                       |                  | Murni Teguh Memorial Hospital and Bunda Thamrin Hospital, North Sumatera, Indonesia                                           | Indonesia                                |                                                         |                                                                                            |
| Gabriel                           | Suen           |                       |                  | Sturgeon Community Hospital, St Albert, Canada                                                                                | Canada                                   |                                                         |                                                                                            |
| Jacky Y.                          | Suen           |                       |                  | University of Queensland, Brisbane, Australia                                                                                 | Australia                                |                                                         |                                                                                            |
| Prasanth                          | Sukumar        |                       |                  | St Vincents University Hospital, Dublin, Ireland                                                                              | Ireland                                  |                                                         |                                                                                            |
| Asfia                             | Sultana        |                       |                  | St Joseph's Health Center, Sherbrooke, Canada                                                                                 | Canada                                   |                                                         |                                                                                            |
| Charlotte                         | Summers        |                       |                  | Department of Medicine, University of Cambridge, Cambridge, Cambridgeshire, UK                                                | United Kingdom                           |                                                         |                                                                                            |
| Dubravka                          | Supic          |                       |                  | Connolly Hospital Blanchardstown, Dublin, Ireland                                                                             | Ireland                                  |                                                         |                                                                                            |
| Deepashankari                     | Suppiah        |                       |                  | Sarawak General Hospital, Sarawak, Malaysia                                                                                   | Malaysia                                 |                                                         |                                                                                            |
| Magdalena                         | Surovcová      |                       |                  | University Hospital Ostrava, Ostrava-Poruba, Czechia                                                                          | Czechia                                  |                                                         |                                                                                            |

| *First Name and Middle Initial(s) | *Last Name   | *Suffix (eg, Jr, III) | Academic Degrees | Institution                                                                         | Location (city, state/province, country) | Role or Contribution, eg, chair, principal investigator | Group (if more than 1 Group listed in the byline) and/or Subgroup (eg, Steering Committee) |
|-----------------------------------|--------------|-----------------------|------------------|-------------------------------------------------------------------------------------|------------------------------------------|---------------------------------------------------------|--------------------------------------------------------------------------------------------|
| Atie                              | Suwarti      |                       |                  | Murni Teguh Memorial Hospital and Bunda Thamrin Hospital, North Sumatera, Indonesia | Indonesia                                |                                                         |                                                                                            |
| Andrey                            | Svistunov    |                       |                  | Sechenov University, Moscow, Russia                                                 | Russia                                   |                                                         |                                                                                            |
| Sarah                             | Syahrin      |                       |                  | Sungai Buloh Hospital, Selangor, Malaysia                                           | Malaysia                                 |                                                         |                                                                                            |
| Konstantinos                      | Syrigos      |                       |                  | Sotiria General Hospital, Athens, Greece                                            | Greece                                   |                                                         |                                                                                            |
| Jaques                            | Sztajn bok   |                       |                  | Instituto de Infectologia Emílio Ribas, Sao Paulo, Brazil                           | Brazil                                   |                                                         |                                                                                            |
| Konstanty                         | Szuldrzynski |                       |                  | University Hospital in Krakow, Krakow, Poland                                       | Poland                                   |                                                         |                                                                                            |
| Shirin                            | Tabrizi      |                       |                  | McGill University Health Centre, Montreal, Canada                                   | Canada                                   |                                                         |                                                                                            |
| Fabio S.                          | Taccone      |                       |                  | CUB-Hôpital Erasme, Bruxelles, Belgium                                              | Belgium                                  |                                                         |                                                                                            |
| Lysa                              | Tagherset    |                       |                  | INSERM, Paris, France                                                               | France                                   |                                                         |                                                                                            |
| Shahdattul Mawarni                | Taib         |                       |                  | Kuala Lumpur Hospital, WPKL, Malaysia                                               | Malaysia                                 |                                                         |                                                                                            |
| Ewa                               | Talarek      |                       |                  | Department of Children's Infectious Diseases, Warsaw, Poland                        | Poland                                   |                                                         |                                                                                            |
| Sara                              | Taleb        |                       |                  | Hamad General Hospital, Doha, Qatar                                                 | Qatar                                    |                                                         |                                                                                            |
| Jelmer                            | Talsma       |                       |                  | Gelre Hospitals, Zutphen, Netherlands                                               | Netherlands                              |                                                         |                                                                                            |
| Renaud                            | Tamisier     |                       |                  | Centre Hospitalier Universitaire Grenoble-Alpes_FU, Grenoble, France                | France                                   |                                                         |                                                                                            |
| Maria Lawrensia                   | Tampubolon   |                       |                  | RSPI Prof Dr Sulianti Saroso, Jakarta, Indonesia                                    | Indonesia                                |                                                         |                                                                                            |
| Kim Keat                          | Tan          |                       |                  | Sungai Buloh Hospital, Selangor, Malaysia                                           | Malaysia                                 |                                                         |                                                                                            |
| Yan Chyi                          | Tan          |                       |                  | Sungai Buloh Hospital, Selangor, Malaysia                                           | Malaysia                                 |                                                         |                                                                                            |
| Hiroyuki                          | Tanaka       |                       |                  | Kyoto Medical Centre, Kyoto, Japan                                                  | Japan                                    |                                                         |                                                                                            |
| Taku                              | Tanaka       |                       |                  | Nagoya University Hospital, Nagoya, Japan                                           | Japan                                    |                                                         |                                                                                            |
| Hayato                            | Taniguchi    |                       |                  | Yokohama City University Medical Center, Yokohama, Japan                            | Japan                                    |                                                         |                                                                                            |
| Coralie                           | Tardivon     |                       |                  | INSERM, Paris, France                                                               | France                                   |                                                         |                                                                                            |
| Pierre                            | Tattevin     |                       |                  | Centre Hospitalier Universitaire Rennes (Hôpital Pontchaillou), Rennes, France      | France                                   |                                                         |                                                                                            |
| M Azhari                          | Taufik       |                       |                  | Fatmawati Hospital, Jakarta, Indonesia                                              | Indonesia                                |                                                         |                                                                                            |
| Hassan                            | Tawfik       |                       |                  | Galway University Hospital, Galway, Ireland                                         | Ireland                                  |                                                         |                                                                                            |

| *First Name and Middle Initial(s) | *Last Name      | *Suffix (eg, Jr, III) | Academic Degrees | Institution                                                                                            | Location (city, state/province, country) | Role or Contribution, eg, chair, principal investigator | Group (if more than 1 Group listed in the byline) and/or Subgroup (eg, Steering Committee) |
|-----------------------------------|-----------------|-----------------------|------------------|--------------------------------------------------------------------------------------------------------|------------------------------------------|---------------------------------------------------------|--------------------------------------------------------------------------------------------|
| Tze Yuan                          | Tee             |                       |                  | Tawau Hospital, Sabah, Malaysia                                                                        | Malaysia                                 |                                                         |                                                                                            |
| João                              | Teixeira        |                       |                  | Hospital Curry Cabral - Intensive Care Unit - UCIP7, Lisbon, Portugal                                  | Portugal                                 |                                                         |                                                                                            |
| Sofia                             | Tejada          |                       |                  | Hospital Universitario de Alava, Araba, Spain                                                          | Spain                                    |                                                         |                                                                                            |
| Marie-Capucine                    | Tellier         |                       |                  | INSERM, Paris, France                                                                                  | France                                   |                                                         |                                                                                            |
| Sze Kye                           | Teoh            |                       |                  | Raja Perempuan Zainab II Hospital, Kelantan, Malaysia                                                  | Malaysia                                 |                                                         |                                                                                            |
| Vanessa                           | Teotonio        |                       |                  | Complexo Hospitalar Dr. Clementino Fraga, João Pessoa city, Brazil                                     | Brazil                                   |                                                         |                                                                                            |
| François                          | Téoulé          |                       |                  | INSERM, Paris, France                                                                                  | France                                   |                                                         |                                                                                            |
| Olivier                           | Terrier         |                       |                  | INSERM, Paris, France                                                                                  | France                                   |                                                         |                                                                                            |
| Nicolas                           | Terzi           |                       |                  | Centre Hospitalier Universitaire Grenoble-Alpes, Grenoble, France                                      | France                                   |                                                         |                                                                                            |
| Hubert                            | Tessier-Grenier |                       |                  | Centre hospitalier de l'université de Montréal, Montreal, Canada                                       | Canada                                   |                                                         |                                                                                            |
| Adrian                            | Tey             |                       |                  | University Hospital - Limerick, Limerick, Ireland                                                      | Ireland                                  |                                                         |                                                                                            |
| Alif Adlan Mohd                   | Thabit          |                       |                  | Sungai Buloh Hospital, Selangor, Malaysia                                                              | Malaysia                                 |                                                         |                                                                                            |
| Zhang Duan                        | Tham            |                       |                  | Kuala Lumpur Hospital, WPKL, Malaysia                                                                  | Malaysia                                 |                                                         |                                                                                            |
| Suvintheran                       | Thangavelu      |                       |                  | Sungai Buloh Hospital, Selangor, Malaysia                                                              | Malaysia                                 |                                                         |                                                                                            |
| Elmi                              | Theron          |                       |                  | Galway University Hospital, Galway, Ireland                                                            | Ireland                                  |                                                         |                                                                                            |
| Vincent                           | Thibault        |                       |                  | Centre Hospitalier Universitaire Rennes (Hôpital Pontchaillou), Rennes, France                         | France                                   |                                                         |                                                                                            |
| Simon-Djamel                      | Thiberville     |                       |                  | Centre Hospitalier Louis Raffalli, Manosque, France                                                    | France                                   |                                                         |                                                                                            |
| Benoît                            | Thill           |                       |                  | Centre Hospitalier de Béziers, Béziers, France                                                         | France                                   |                                                         |                                                                                            |
| Jananee                           | Thirumanickam   |                       |                  | Sungai Buloh Hospital, Selangor, Malaysia                                                              | Malaysia                                 |                                                         |                                                                                            |
| Shaun                             | Thompson        |                       |                  | University of Nebraska Medical Center, Omaha, United States of America                                 | United States of America                 |                                                         |                                                                                            |
| Niamh                             | Thompson        |                       |                  | Clinical Services Department Fajara, Gambia                                                            | Gambia                                   |                                                         |                                                                                            |
| David                             | Thomson         |                       |                  | Division of Critical Care, University of Cape Town and Groote Schuur Hospital, Cape Town, South Africa | South Africa                             |                                                         |                                                                                            |



| *First Name and Middle Initial(s) | *Last Name         | *Suffix (eg, Jr, III) | Academic Degrees | Institution                                                                              | Location (city, state/province, country) | Role or Contribution, eg, chair, principal investigator | Group (if more than 1 Group listed in the byline) and/or Subgroup (eg, Steering Committee) |
|-----------------------------------|--------------------|-----------------------|------------------|------------------------------------------------------------------------------------------|------------------------------------------|---------------------------------------------------------|--------------------------------------------------------------------------------------------|
| Emma C.                           | Thomson            |                       |                  | MRC-University of Glasgow Centre for Virus Research, 464 Bearsden Road, Glasgow, UK      | United Kingdom                           |                                                         |                                                                                            |
| Mathew                            | Thorpe             |                       |                  | Oxford University (ISARIC4C), Oxford, United Kingdom                                     | United Kingdom                           |                                                         |                                                                                            |
| Surain Raaj Thanga                | Thurai             |                       |                  | Sungai Buloh Hospital, Selangor, Malaysia                                                | Malaysia                                 |                                                         |                                                                                            |
| Ryan S.                           | Thwaites           |                       |                  | Oxford University (ISARIC4C), Oxford, United Kingdom                                     | United Kingdom                           |                                                         |                                                                                            |
| Paul                              | Tierney            |                       |                  | Tallaght University Hospital, Dublin, Ireland                                            | Ireland                                  |                                                         |                                                                                            |
| Vadim                             | Tieroshyn          |                       |                  | Lugansk State Medical University - Department of Internal Medicine No2, Lugansk, Ukraine | Ukraine                                  |                                                         |                                                                                            |
| Peter S                           | Timashev           |                       |                  | Sechenov University, Moscow, Russia                                                      | Russia                                   |                                                         |                                                                                            |
| Jean-François                     | Timsit             |                       |                  | INSERM, Paris, France                                                                    | France                                   |                                                         |                                                                                            |
| Noémie                            | Tissot             |                       |                  | Centre Hospitalier Universitaire de Besançon, Besançon, France                           | France                                   |                                                         |                                                                                            |
| Fiona                             | Toal               |                       |                  | St Vincents University Hospital, Dublin, Ireland                                         | Ireland                                  |                                                         |                                                                                            |
| Jordan Zhien Yang                 | Toh                |                       |                  | Kuala Lumpur Hospital, WPKL, Malaysia                                                    | Malaysia                                 |                                                         |                                                                                            |
| Maria                             | Toki               |                       |                  | Sotiria General Hospital, Athens, Greece                                                 | Greece                                   |                                                         |                                                                                            |
| Kristian                          | Tonby              |                       |                  | Oslo University Hospital, Oslo, Norway                                                   | Norway                                   |                                                         |                                                                                            |
| Sia Loong                         | Tonnii             |                       |                  | Sarawak General Hospital, Sarawak, Malaysia                                              | Malaysia                                 |                                                         |                                                                                            |
| Marta                             | Torre              |                       |                  | Hospital Curry Cabral - Intensive Care Unit - UCIP7, Lisbon, Portugal                    | Portugal                                 |                                                         |                                                                                            |
| Margarida                         | Torres             |                       |                  | Hospital de Curry Cabral - Infectious Diseases, Lisbon, Portugal                         | Portugal                                 |                                                         |                                                                                            |
| Antoni                            | Torres             |                       |                  | Hospital Clinic, Barcelona, Spain                                                        | Spain                                    |                                                         |                                                                                            |
| Rosario Maria                     | Torres Santos-Olmo |                       |                  | La Paz Hospital, Madrid, Spain                                                           | Spain                                    |                                                         |                                                                                            |
| Hernando                          | Torres-Zevallos    |                       |                  | Clínica Internacional, Lima, Peru                                                        | Peru                                     |                                                         |                                                                                            |
| Michael                           | Towers             |                       |                  | Beaumont Hospital, Dublin, Ireland                                                       | Ireland                                  |                                                         |                                                                                            |
| Tony                              | Trapani            |                       |                  | Albury Wodonga Health, Albury, Australia                                                 | Australia                                |                                                         |                                                                                            |

| *First Name and Middle Initial(s) | *Last Name | *Suffix (eg, Jr, III) | Academic Degrees | Institution                                                                                            | Location (city, state/province, country) | Role or Contribution, eg, chair, principal investigator | Group (if more than 1 Group listed in the byline) and/or Subgroup (eg, Steering Committee) |
|-----------------------------------|------------|-----------------------|------------------|--------------------------------------------------------------------------------------------------------|------------------------------------------|---------------------------------------------------------|--------------------------------------------------------------------------------------------|
| Cécile                            | Tromeur    |                       |                  | Centre Hospitalier Universitaire de Brest, Brest, France                                               | France                                   |                                                         |                                                                                            |
| Ioannis                           | Trontzas   |                       |                  | Sotiria General Hospital, Athens, Greece                                                               | Greece                                   |                                                         |                                                                                            |
| Tiffany                           | Trouillon  |                       |                  | Centre Hospitalier Universitaire de Saint-Étienne, Saint-Étienne, France                               | France                                   |                                                         |                                                                                            |
| Jeanne                            | Truong     |                       |                  | Hôpital Robert-Debré AP-HP, Paris, France                                                              | France                                   |                                                         |                                                                                            |
| Christelle                        | Tual       |                       |                  | INSERM, Paris, France                                                                                  | France                                   |                                                         |                                                                                            |
| Sarah                             | Tubiana    |                       |                  | INSERM, Paris, France                                                                                  | France                                   |                                                         |                                                                                            |
| Helen                             | Tuite      |                       |                  | Galway University Hospital, Galway, Ireland                                                            | Ireland                                  |                                                         |                                                                                            |
| Alexis F.                         | Turgeon    |                       |                  | Hôpital de l'Enfant-Jésus, Quebec, Canada                                                              | Canada                                   |                                                         |                                                                                            |
| Jean-Marie                        | Turmel     |                       |                  | Centre Hospitalier Universitaire de Martinique, Fort-de-France, Saint Martin (French)                  | Saint Martin (French)                    |                                                         |                                                                                            |
| Lance C.W.                        | Turtle     |                       |                  | Oxford University (ISARIC4C), Oxford, United Kingdom                                                   | United Kingdom                           |                                                         |                                                                                            |
| Anders                            | Tveita     |                       |                  | Baerum Sykehus, Gjøttum, Norway                                                                        | Norway                                   |                                                         |                                                                                            |
| Pawel                             | Twardowski |                       |                  | Dunedin Public Hospital, Dunedin, New Zealand                                                          | New Zealand                              |                                                         |                                                                                            |
| Makoto                            | Uchiyama   |                       |                  | Legacy Emanuel Medical Center, Portland, United States of America                                      | United States of America                 |                                                         |                                                                                            |
| PG Ishara                         | Udayanga   |                       |                  | CCA Network                                                                                            | Unknown                                  |                                                         |                                                                                            |
| Andrew                            | Udy        |                       |                  | Monash University, Melbourne, Australia                                                                | Australia                                |                                                         |                                                                                            |
| Roman                             | Ullrich    |                       |                  | Medical University of Vienna, Vienna, Austria                                                          | Austria                                  |                                                         |                                                                                            |
| Alberto                           | Uribe      |                       |                  | Ohio State University, Columbus, United States of America                                              | United States of America                 |                                                         |                                                                                            |
| Asad                              | Usman      |                       |                  | Perelman School of Medicine at the University of Pennsylvania, Philadelphia, United States of America  | United States of America                 |                                                         |                                                                                            |
| Timothy M.                        | Uyeki      |                       |                  | WHO-ISARIC Clinical Characterisation Protocol & SPRINT-SARI, United Kingdom                            | United Kingdom                           |                                                         |                                                                                            |
| Michel                            | Vaillant   |                       |                  | Competence Centre for Methodology and Statistics, Luxembourg Institute of Health, Strassen, Luxembourg | Luxembourg                               |                                                         |                                                                                            |

| *First Name and Middle Initial(s) | *Last Name        | *Suffix (eg, Jr, III) | Academic Degrees | Institution                                                           | Location (city, state/province, country) | Role or Contribution, eg, chair, principal investigator | Group (if more than 1 Group listed in the byline) and/or Subgroup (eg, Steering Committee) |
|-----------------------------------|-------------------|-----------------------|------------------|-----------------------------------------------------------------------|------------------------------------------|---------------------------------------------------------|--------------------------------------------------------------------------------------------|
| Cristinava                        | Vajdovics         |                       |                  | University Hospital, Kerry, Ireland                                   | Ireland                                  |                                                         |                                                                                            |
| Piero                             | Valentini         |                       |                  | Università Cattolica del Sacro Cuore, Rome, Italy                     | Italy                                    |                                                         |                                                                                            |
| Luís                              | Val-Flores        |                       |                  | Hospital Curry Cabral - Intensive Care Unit - UCIP7, Lisbon, Portugal | Portugal                                 |                                                         |                                                                                            |
| Stijn                             | Van de Velde      |                       |                  | AZ Maria Middelaes, Gent, Belgium                                     | Belgium                                  |                                                         |                                                                                            |
| Marcel                            | van den Berge     |                       |                  | ADRZ, Amsterdam, Netherlands                                          | Netherlands                              |                                                         |                                                                                            |
| Machteld                          | van der Feltz     |                       |                  | Alrijne Hospital, Leiden, Netherlands                                 | Netherlands                              |                                                         |                                                                                            |
| Job                               | van der Palen     |                       |                  | Medisch Spectrum Twente, Zutphen, Netherlands                         | Netherlands                              |                                                         |                                                                                            |
| Paul                              | van der Valk      |                       |                  | Medisch Spectrum Twente, Zutphen, Netherlands                         | Netherlands                              |                                                         |                                                                                            |
| Nicky                             | Van Der Vekens    |                       |                  | AZ Maria Middelaes, Gent, Belgium                                     | Belgium                                  |                                                         |                                                                                            |
| Peter                             | Van der Voort     |                       |                  | University Medical Center Groningen, Groningen, Netherlands           | Netherlands                              |                                                         |                                                                                            |
| Sylvie                            | Van Der Werf      |                       |                  | INSERM, Paris, France                                                 | France                                   |                                                         |                                                                                            |
| Laura                             | van Gulik         |                       |                  | Meander Medical Centre, Amersfoort, Netherlands                       | Netherlands                              |                                                         |                                                                                            |
| Jarne                             | Van Hattem        |                       |                  | Tergooi Hospital, Hilversum, Netherlands                              | Netherlands                              |                                                         |                                                                                            |
| Carolien                          | van Netten        |                       |                  | Adrz, Goes, Netherlands                                               | Netherlands                              |                                                         |                                                                                            |
| Frank                             | van Someren Gréve |                       |                  | PREPARE and RECOVER EU Consortium, Belgium                            | Belgium                                  |                                                         |                                                                                            |
| Ilonka                            | van Veen          |                       |                  | Medisch Spectrum Twente, Zutphen, Netherlands                         | Netherlands                              |                                                         |                                                                                            |
| Hugo                              | Van Willigen      |                       |                  | PREPARE and RECOVER EU Consortium, Belgium                            | Belgium                                  |                                                         |                                                                                            |
| Noémie                            | Vanel             |                       |                  | INSERM, Paris, France                                                 | France                                   |                                                         |                                                                                            |
| Henk                              | Vanoverschelde    |                       |                  | AZ Maria Middelaes, Gent, Belgium                                     | Belgium                                  |                                                         |                                                                                            |
| Michael                           | Varrone           |                       |                  | Northwell Health, New York, United States of America                  | United States of America                 |                                                         |                                                                                            |
| Shoban Raj                        | Vasudayan         |                       |                  | Tuanku Ja'afar, Negeri Sembilan, Malaysia                             | Malaysia                                 |                                                         |                                                                                            |

| *First Name and Middle Initial(s) | *Last Name   | *Suffix (eg, Jr, III) | Academic Degrees | Institution                                                                              | Location (city, state/province, country) | Role or Contribution, eg, chair, principal investigator | Group (if more than 1 Group listed in the byline) and/or Subgroup (eg, Steering Committee) |
|-----------------------------------|--------------|-----------------------|------------------|------------------------------------------------------------------------------------------|------------------------------------------|---------------------------------------------------------|--------------------------------------------------------------------------------------------|
| Charline                          | Vauchy       |                       |                  | Centre Hospitalier Universitaire de Besançon, Besançon, France                           | France                                   |                                                         |                                                                                            |
| Pavan Kumar                       | Vecham       |                       |                  | Apollo Hospitals Chennai, Chennai, India                                                 | India                                    |                                                         |                                                                                            |
| Shaminee                          | Veeran       |                       |                  | Sungai Buloh Hospital, Selangor, Malaysia                                                | Malaysia                                 |                                                         |                                                                                            |
| Aurélie                           | Veislinger   |                       |                  | INSERM, Paris, France                                                                    | France                                   |                                                         |                                                                                            |
| Sebastian                         | Vencken      |                       |                  | St Vincents University Hospital, Dublin, Ireland                                         | Ireland                                  |                                                         |                                                                                            |
| Sara                              | Ventura      |                       |                  | Hospital de São José -U.U.M., Lisbon, Portugal                                           | Portugal                                 |                                                         |                                                                                            |
| Annelies                          | Verbon       |                       |                  | Erasmus Medical Centre, Rotterdam, Netherlands                                           | Netherlands                              |                                                         |                                                                                            |
| José Ernesto                      | Vidal        |                       |                  | Instituto de Infectologia Emílio Ribas, Sao Paulo, Brazil                                | Brazil                                   |                                                         |                                                                                            |
| César                             | Vieira       |                       |                  | Hospital Curry Cabral - Intensive Care Unit - UCIP7, Lisbon, Portugal                    | Portugal                                 |                                                         |                                                                                            |
| Judit                             | Villar       |                       |                  | Hospital del Mar, Barcelona, Spain                                                       | Spain                                    |                                                         |                                                                                            |
| Pierre-Marc                       | Villeneuve   |                       |                  | Grey Nun's Community Hospital, Edmonton, Canada                                          | Canada                                   |                                                         |                                                                                            |
| Andrea                            | Villoldo     |                       |                  | Mar del Plata Medical Foundation Private Community Hospital, Mar Del Plata, Argentina    | Argentina                                |                                                         |                                                                                            |
| Gayatri                           | Vishwanathan |                       |                  | Long COVID India - Terna Specialty Hospital and Research Centre, Mumbai, India           | India                                    |                                                         |                                                                                            |
| Benoit                            | Visseaux     |                       |                  | INSERM, Paris, France                                                                    | France                                   |                                                         |                                                                                            |
| Hannah                            | Visser       |                       |                  | Beatrix ziekenhuis, Gorinchem, Netherlands                                               | Netherlands                              |                                                         |                                                                                            |
| Chiara                            | Vitiello     |                       |                  | Istituto Mediterraneo per i Trapianti e Terapie ad Alta Specializzazione, Palermo, Italy | Italy                                    |                                                         |                                                                                            |
| Manivanh                          | Vongsouvath  |                       |                  | Salavan Provincial Hospital, Salavan, Laos                                               | Laos                                     |                                                         |                                                                                            |
| Harald                            | Vonkeman     |                       |                  | Medisch Spectrum Twente, Zutphen, Netherlands                                            | Netherlands                              |                                                         |                                                                                            |
| Fanny                             | Vuotto       |                       |                  | Centre Hospitalier Universitaire de Lille, Lille, France                                 | France                                   |                                                         |                                                                                            |
| Noor Hidayu                       | Wahab        |                       |                  | Kuala Lumpur Hospital, WPKL, Malaysia                                                    | Malaysia                                 |                                                         |                                                                                            |
| Suhaila Abdul                     | Wahab        |                       |                  | Tuanku Fauziah Hospital, Perlis, Malaysia                                                | Malaysia                                 |                                                         |                                                                                            |

| *First Name and Middle Initial(s) | *Last Name | *Suffix (eg, Jr, III) | Academic Degrees | Institution                                                                            | Location (city, state/province, country) | Role or Contribution, eg, chair, principal investigator | Group (if more than 1 Group listed in the byline) and/or Subgroup (eg, Steering Committee) |
|-----------------------------------|------------|-----------------------|------------------|----------------------------------------------------------------------------------------|------------------------------------------|---------------------------------------------------------|--------------------------------------------------------------------------------------------|
| Nadirah Abdul                     | Wahid      |                       |                  | Sungai Buloh Hospital, Selangor, Malaysia                                              | Malaysia                                 |                                                         |                                                                                            |
| Marina                            | Wainstein  |                       |                  | Caja Nacional De Salud, Trinidad, Bolivia                                              | Bolivia                                  |                                                         |                                                                                            |
| Laura                             | Walsh      |                       |                  | Galway University Hospital, Galway, Ireland                                            | Ireland                                  |                                                         |                                                                                            |
| Chih-Hsien                        | Wang       |                       |                  | National Taiwan University Hospital, Taipei City, Taiwan                               | Taiwan                                   |                                                         |                                                                                            |
| Steve                             | Webb       |                       |                  | WHO-ISARIC Clinical Characterisation Protocol & SPRINT-SARI, United Kingdom            | United Kingdom                           |                                                         |                                                                                            |
| Jia                               | Wei        |                       |                  | Big Data Institute, Nuffield Department of Medicine, University of Oxford, Oxford, UK  | United Kingdom                           |                                                         |                                                                                            |
| Katharina                         | Weil       |                       |                  | University Hospital Dusseldorf, Dusseldorf, Germany                                    | Germany                                  |                                                         |                                                                                            |
| Tan Pei                           | Wen        |                       |                  | Tuanku Ja'afar, Negeri Sembilan, Malaysia                                              | Malaysia                                 |                                                         |                                                                                            |
| Sanne                             | Wesselius  |                       |                  | Franciscus Gasthuis & Vlietland, Rotterdam, Netherlands                                | Netherlands                              |                                                         |                                                                                            |
| T. Eoin                           | West       |                       |                  | University of Washington Medical Center - Northwest, Seattle, United States of America | United States of America                 |                                                         |                                                                                            |
| Murray                            | Wham       |                       |                  | Oxford University (ISARIC4C), Oxford, United Kingdom                                   | United Kingdom                           |                                                         |                                                                                            |
| Bryan                             | Whelan     |                       |                  | Sligo University Hospital (Saoilta), Sligo, Ireland                                    | Ireland                                  |                                                         |                                                                                            |
| Nicole                            | White      |                       |                  | University of Queensland, Brisbane, Australia                                          | Australia                                |                                                         |                                                                                            |
| Paul Henri                        | Wicky      |                       |                  | Hôpital Bichat Claude-Bernard AP-HP, Paris, France                                     | France                                   |                                                         |                                                                                            |
| Aurélie                           | Wiedemann  |                       |                  | INSERM, Paris, France                                                                  | France                                   |                                                         |                                                                                            |
| Surya Otto                        | Wijaya     |                       |                  | RSPI Prof Dr Sulianti Saroso, Jakarta, Indonesia                                       | Indonesia                                |                                                         |                                                                                            |
| Keith                             | Wille      |                       |                  | University of Alabama at Birmingham Hospital, Birmingham, United States of America     | United States of America                 |                                                         |                                                                                            |
| Sue                               | Willems    |                       |                  | Royal Columbian Hospital, Vancouver, Canada                                            | Canada                                   |                                                         |                                                                                            |
| Bailey                            | Williams   |                       |                  | University of Nebraska Medical Centre                                                  | United States of America                 |                                                         |                                                                                            |

| *First Name and Middle Initial(s) | *Last Name     | *Suffix (eg, Jr, III) | Academic Degrees | Institution                                                                                                                                               | Location (city, state/province, country) | Role or Contribution, eg, chair, principal investigator | Group (if more than 1 Group listed in the byline) and/or Subgroup (eg, Steering Committee) |
|-----------------------------------|----------------|-----------------------|------------------|-----------------------------------------------------------------------------------------------------------------------------------------------------------|------------------------------------------|---------------------------------------------------------|--------------------------------------------------------------------------------------------|
| Virginie                          | Williams       |                       |                  | Hospital du Sacre Coeur, Montreal, Canada                                                                                                                 | Canada                                   |                                                         |                                                                                            |
| Patricia J                        | Williams       |                       |                  | Monash University, Melbourne, Australia                                                                                                                   | Australia                                |                                                         |                                                                                            |
| Jessica                           | Wittman        |                       |                  | Royal Columbian Hospital, Vancouver, Canada                                                                                                               | Canada                                   |                                                         |                                                                                            |
| Calvin                            | Wong           |                       |                  | Universitair Ziekenhuis, Gent, Belgium                                                                                                                    | Belgium                                  |                                                         |                                                                                            |
| Xin Ci                            | Wong           |                       |                  | Digital Health Research and Innovation Unit, Institute for Clinical Research, National Institutes of Health (NIH), Ministry of Health, Selangor, Malaysia | Malaysia                                 |                                                         |                                                                                            |
| Yew Sing                          | Wong           |                       |                  | Sungai Buloh Hospital, Selangor, Malaysia                                                                                                                 | Malaysia                                 |                                                         |                                                                                            |
| Teck Fung                         | Wong           |                       |                  | Sarawak General Hospital, Sarawak, Malaysia                                                                                                               | Malaysia                                 |                                                         |                                                                                            |
| Natalie                           | Wright         |                       |                  | St Bernard's Hospital, Gibraltar, Gibraltar                                                                                                               | Gibraltar                                |                                                         |                                                                                            |
| Lim Saio                          | Xian           |                       |                  | Pulau Pinang Hospital, Pulau Pinang, Malaysia                                                                                                             | Malaysia                                 |                                                         |                                                                                            |
| Ioannis                           | Xynogalas      |                       |                  | Sotiria General Hospital, Athens, Greece                                                                                                                  | Greece                                   |                                                         |                                                                                            |
| Siti Rohani Binti Mohd            | Yakop          |                       |                  | Kuala Lumpur Hospital, WPKL, Malaysia                                                                                                                     | Malaysia                                 |                                                         |                                                                                            |
| Masaki                            | Yamazaki       |                       |                  | Kyoto Prefectural University of Medicine, Kyoto, Japan                                                                                                    | Japan                                    |                                                         |                                                                                            |
| Elizabeth                         | Yarad          |                       |                  | Monash University, Melbourne, Australia                                                                                                                   | Australia                                |                                                         |                                                                                            |
| Yazdan                            | Yazdanpanah    |                       |                  | INSERM, Paris, France                                                                                                                                     | France                                   |                                                         |                                                                                            |
| Nicholas                          | Yee Liang Hing |                       |                  | Kuala Lumpur Hospital, WPKL, Malaysia                                                                                                                     | Malaysia                                 |                                                         |                                                                                            |
| Cécile                            | Yelnik         |                       |                  | Hôpital Albert Calmette, Lille, France                                                                                                                    | France                                   |                                                         |                                                                                            |
| Chian Hui                         | Yeoh           |                       |                  | Sultanah Bahiyah Hospital, Kedah, Malaysia                                                                                                                | Malaysia                                 |                                                         |                                                                                            |
| Stephanie                         | Yerkovich      |                       |                  | University of Queensland, Brisbane, Australia                                                                                                             | Australia                                |                                                         |                                                                                            |
| Touxiong                          | Yiaye          |                       |                  | Xieng Khouang Provincial Hospital, Phonsavan, Laos                                                                                                        | Laos                                     |                                                         |                                                                                            |
| Toshiki                           | Yokoyama       |                       |                  | Kouritu Tousei Hospital, Seto City, Japan                                                                                                                 | Japan                                    |                                                         |                                                                                            |
| Hodane                            | Yonis          |                       |                  | Hôpital Lyon Sud - HCL, Lyon, France                                                                                                                      | France                                   |                                                         |                                                                                            |
| Obada                             | Yousif         |                       |                  | Wexford General Hospital, Wexford, Ireland                                                                                                                | Ireland                                  |                                                         |                                                                                            |
| Saptadi                           | Yulianto       |                       |                  | PICU Saiful Anwar Hospital, Malang, Indonesia                                                                                                             | Indonesia                                |                                                         |                                                                                            |
| Akram                             | Zaaqq          |                       |                  | MedStar Washington Hospital Centre, Washington, United States of America                                                                                  | United States of America                 |                                                         |                                                                                            |

| *First Name and Middle Initial(s) | *Last Name  | *Suffix (eg, Jr, III) | Academic Degrees | Institution                                                  | Location (city, state/province, country) | Role or Contribution, eg, chair, principal investigator | Group (if more than 1 Group listed in the byline) and/or Subgroup (eg, Steering Committee) |
|-----------------------------------|-------------|-----------------------|------------------|--------------------------------------------------------------|------------------------------------------|---------------------------------------------------------|--------------------------------------------------------------------------------------------|
| Marion                            | Zabbe       |                       |                  | Centre Hospitalier de Périgueux, Périgueux, France           | France                                   |                                                         |                                                                                            |
| Kai                               | Zacharowski |                       |                  | Uniklinik University Hospital, Frankfurt, Germany            | Germany                                  |                                                         |                                                                                            |
| Masliza                           | Zahid       |                       |                  | Sultanah Aminah Hospital, Johor, Malaysia                    | Malaysia                                 |                                                         |                                                                                            |
| Maram                             | Zahran      |                       |                  | Rambam Hospital, Haifa, Israel                               | Israel                                   |                                                         |                                                                                            |
| Nor Zaila Binti                   | Zaidan      |                       |                  | Melaka Hospital, Melaka, Malaysia                            | Malaysia                                 |                                                         |                                                                                            |
| Maria                             | Zambon      |                       |                  | Oxford University (ISARIC4C), Oxford, United Kingdom         | United Kingdom                           |                                                         |                                                                                            |
| Miguel                            | Zambrano    |                       |                  | Instituto Nacional Del Tórax, Santiago, Chile                | Chile                                    |                                                         |                                                                                            |
| Alberto                           | Zanella     |                       |                  | Fondazione IRCCS Ca, Milan, Italy                            | Italy                                    |                                                         |                                                                                            |
| Konrad                            | Zawadka     |                       |                  | Department of Children's Infectious Diseases, Warsaw, Poland | Poland                                   |                                                         |                                                                                            |
| Nurul                             | Zaynah      |                       |                  | Kuala Lumpur Hospital, WPKL, Malaysia                        | Malaysia                                 |                                                         |                                                                                            |
| Hiba                              | Zayyad      |                       |                  | The Baruch Padeh Medical Center Poriya, Tiberias, Israel     | Israel                                   |                                                         |                                                                                            |
| Alexander                         | Zoufaly     |                       |                  | Sozialmedizinisches Zentrum Sud, Vienna, Austria             | Austria                                  |                                                         |                                                                                            |
| David                             | Zucman      |                       |                  | Hôpital Foch, Suresnes, France                               | France                                   |                                                         |                                                                                            |
