# Supplementary material for: Implementation of Recommendations on the Use of Corticosteroids in Severe COVID-19
Source: PubMed Central journal article supplement (PMC10751594; doi:10.1001/jamanetworkopen.2023.46502), 2023-12-26
Supplement: jamanetwopen-e2346502-s003.pdf [file jamanetwopen-e2346502-s003.pdf]

## Data Sharing Statement

Camirand-Lemyre. Implementation of Recommendations on the Use of Corticosteroids in Severe COVID-19. *JAMA Netw Open*. Published December 26, 2023.  
doi:10.1001/jamanetworkopen.2023.46502

### Data

**Data available:** Yes

**Data types:** Deidentified participant data, Data dictionary

**How to access data:** The data that underpin this analysis are highly detailed clinical data on individuals hospitalised with COVID-19. Due to the sensitive nature of these data and the associated privacy concerns, they are available via a governed data access mechanism following review of a data access committee. Data can be requested via the IDDO COVID-19 Data Sharing Platform (<http://www.iddo.org/covid-19>). The Data Access Application, Terms of Access and details of the Data Access Committee are available on the website. Briefly, the requirements for access are a request from a qualified researcher working with a legal entity who have a health and/or research remit; a scientifically valid reason for data access which adheres to appropriate ethical principles. The full terms are at:

<https://www.iddo.org/document/covid-19-data-access-guidelines>. A small subset of sites who contributed data to this analysis have not agreed to pooled data sharing as above. In the case of requiring access to these data, please contact the corresponding author in the first instance who will look to facilitate access.

**When available:** With publication

### Supporting Documents

**Document types:** Statistical/analytic code

**How to access documents:** After data-sharing agreement is approved by ISARIC, the analytic code will be made available by Pr. Félix Camirand-Lemyre ([Felix.Camirand.Lemyre@USherbrooke.ca](mailto:Felix.Camirand.Lemyre@USherbrooke.ca))

**When available:** With publication

### Additional Information

**Who can access the data:** After data-sharing agreement is approved by ISARIC

**Types of analyses:** For any purpose approved by ISARIC

**Mechanisms of data availability:** Following fulfilment of ISARIC conditions and requirements (<https://isaric.org/partner-analyses-guidance/>)
